# Supplementary material for: Design, synthesis, molecular-docking and antimycobacterial evaluation of some novel 1,2,3-triazolyl xanthenones
Source: Royal Society of Chemistry journal article supplement (doi:10.1039/c6md00593d), 2017-01-01

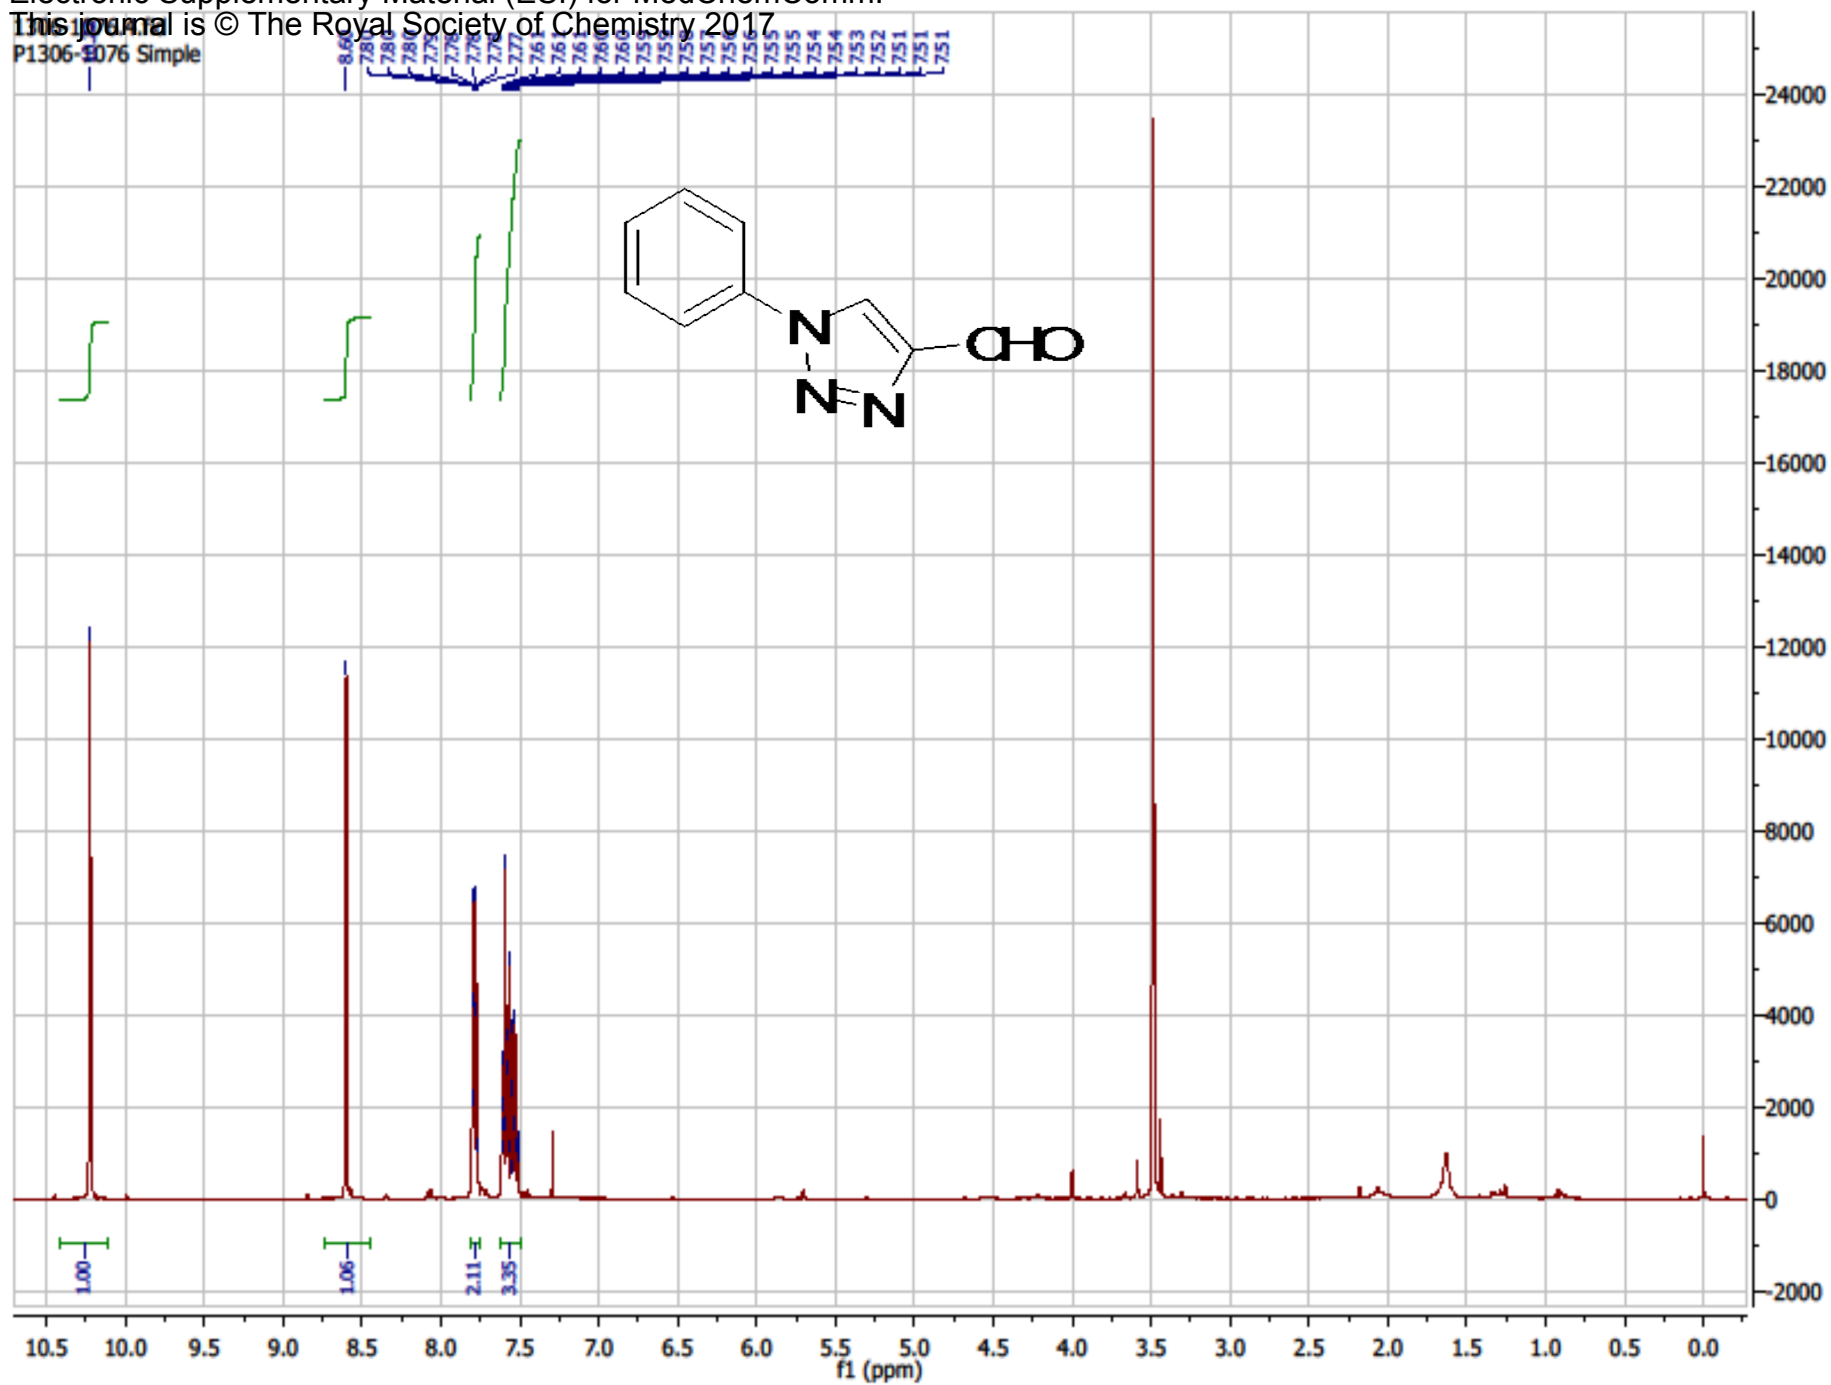

1307-1005.1.fid  
C1307-1005 Simple

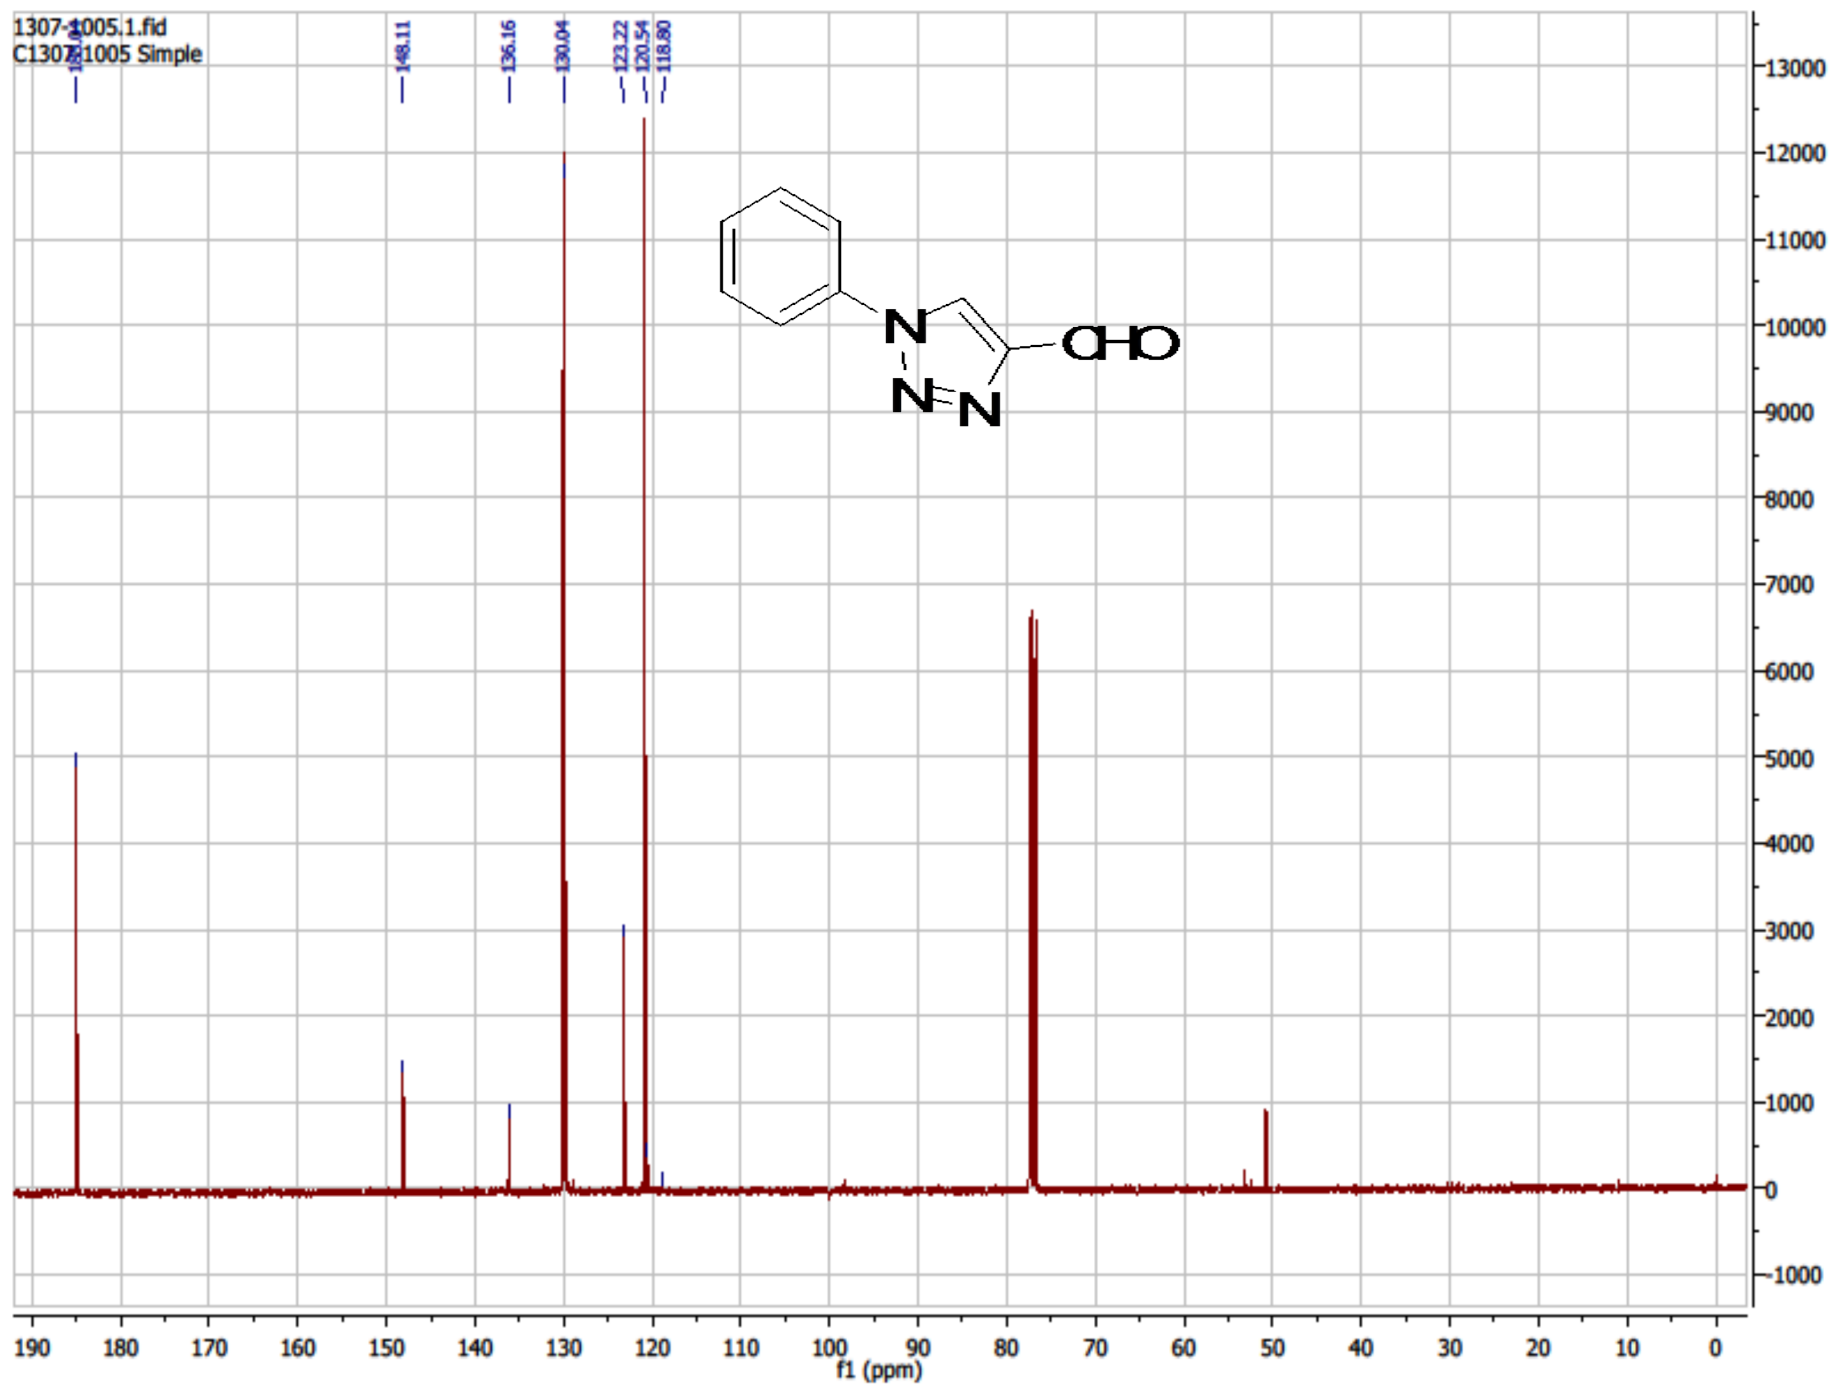

1306-1074.3.fid  
P1306-1074 O-Cl

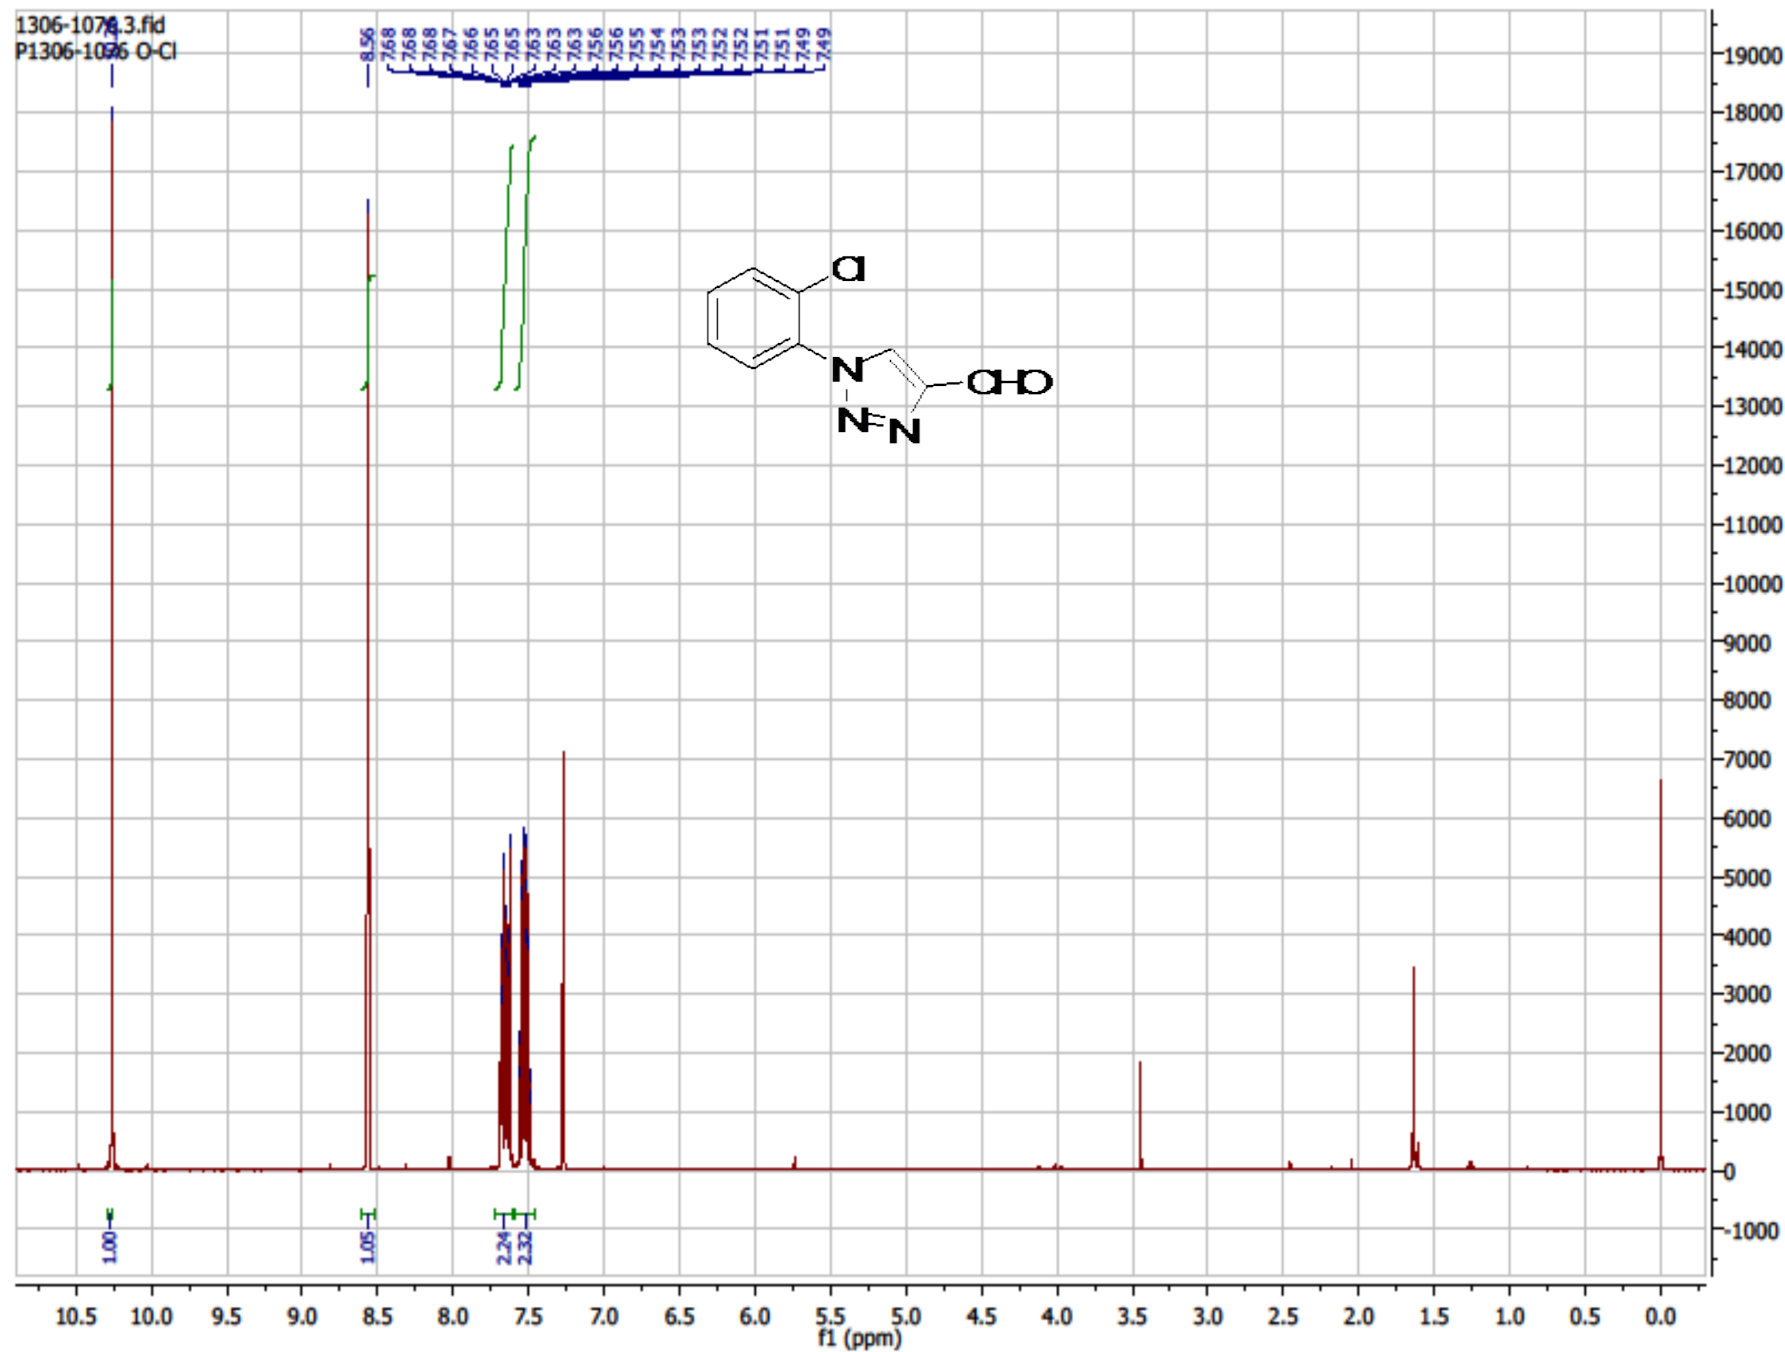

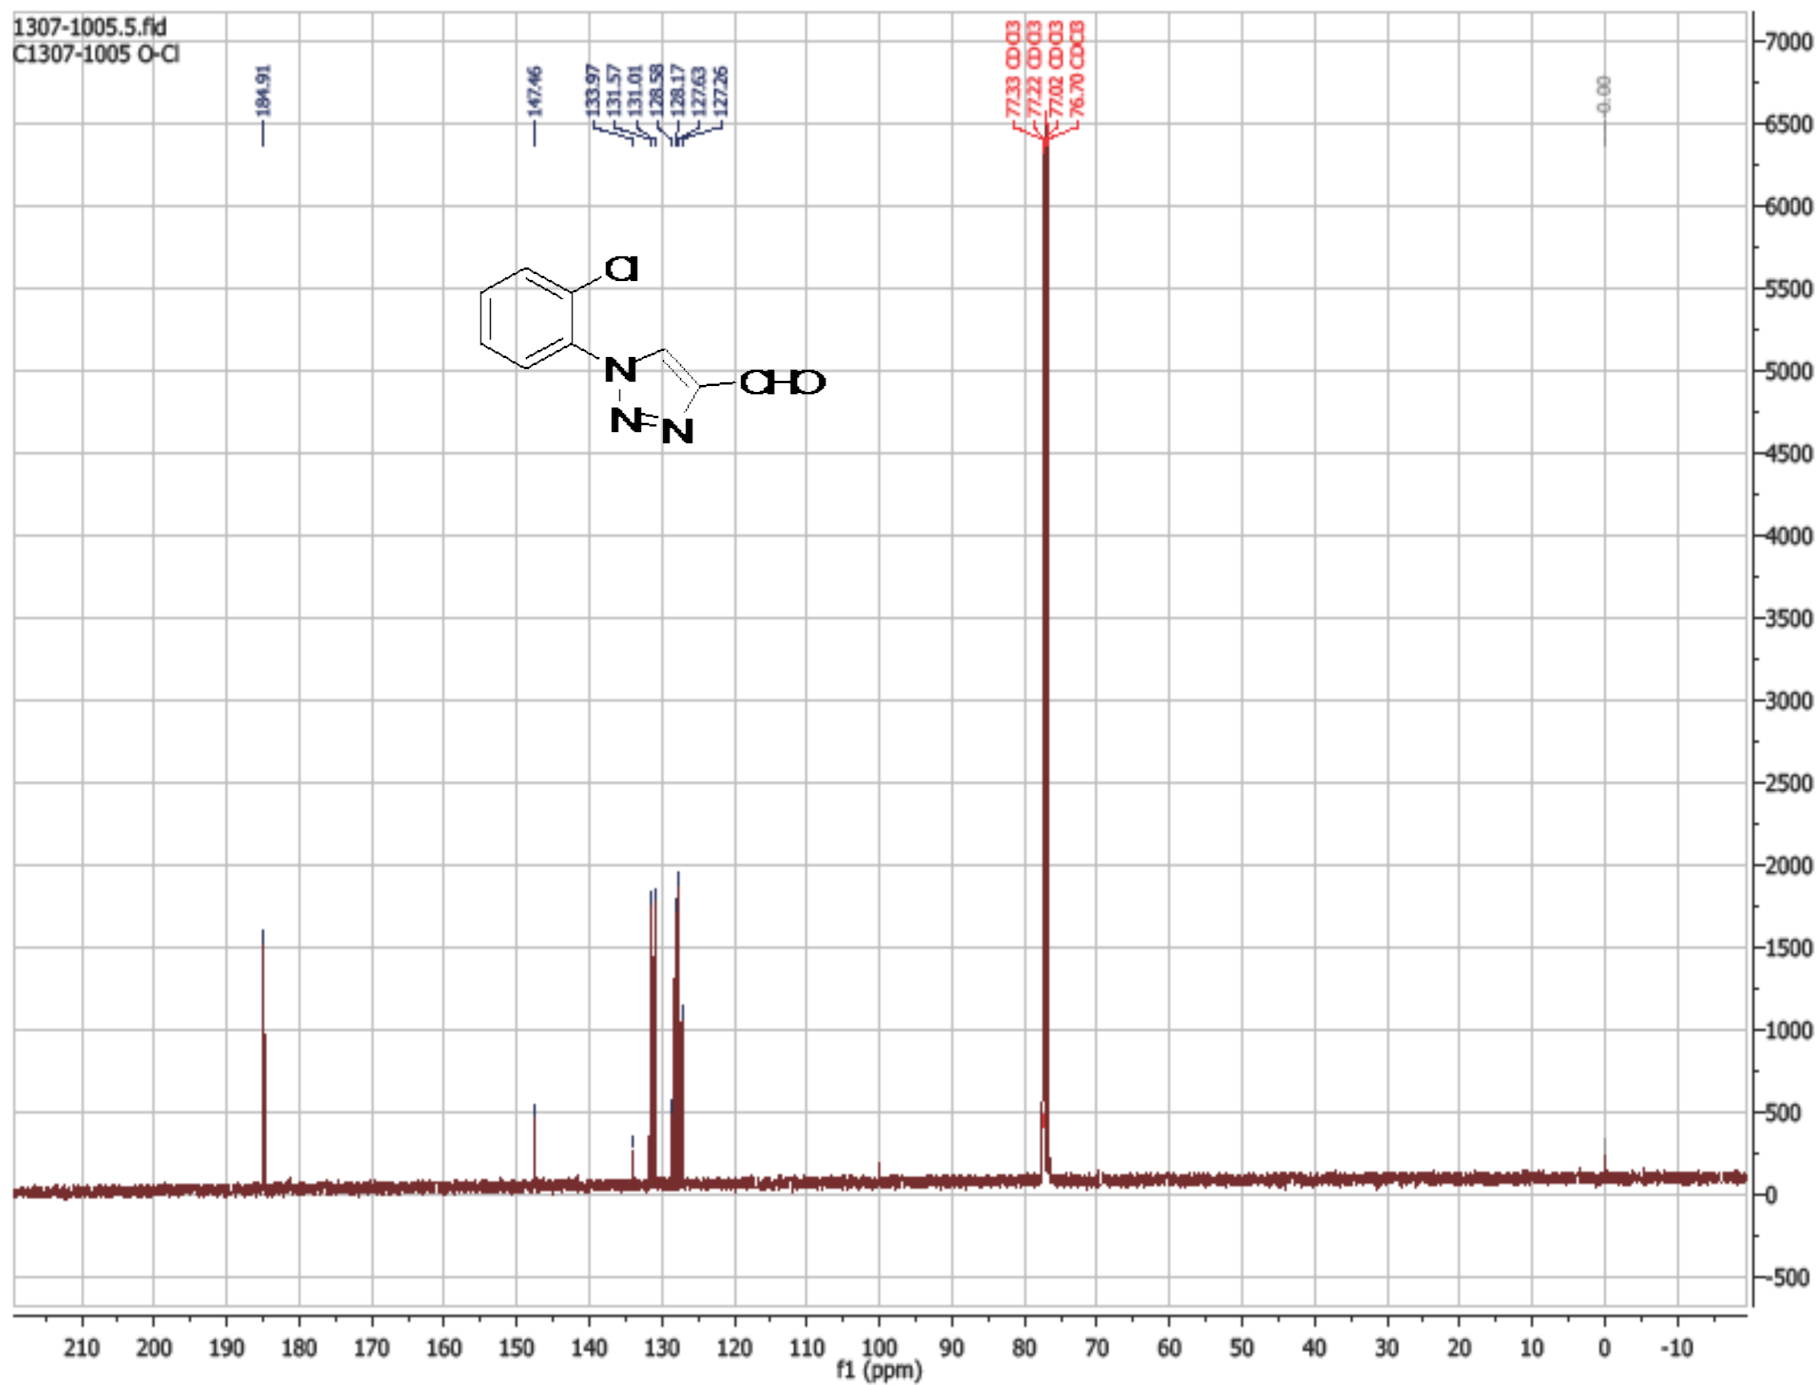



1306-1076.5.fid  
P1306-1076 P-Cl

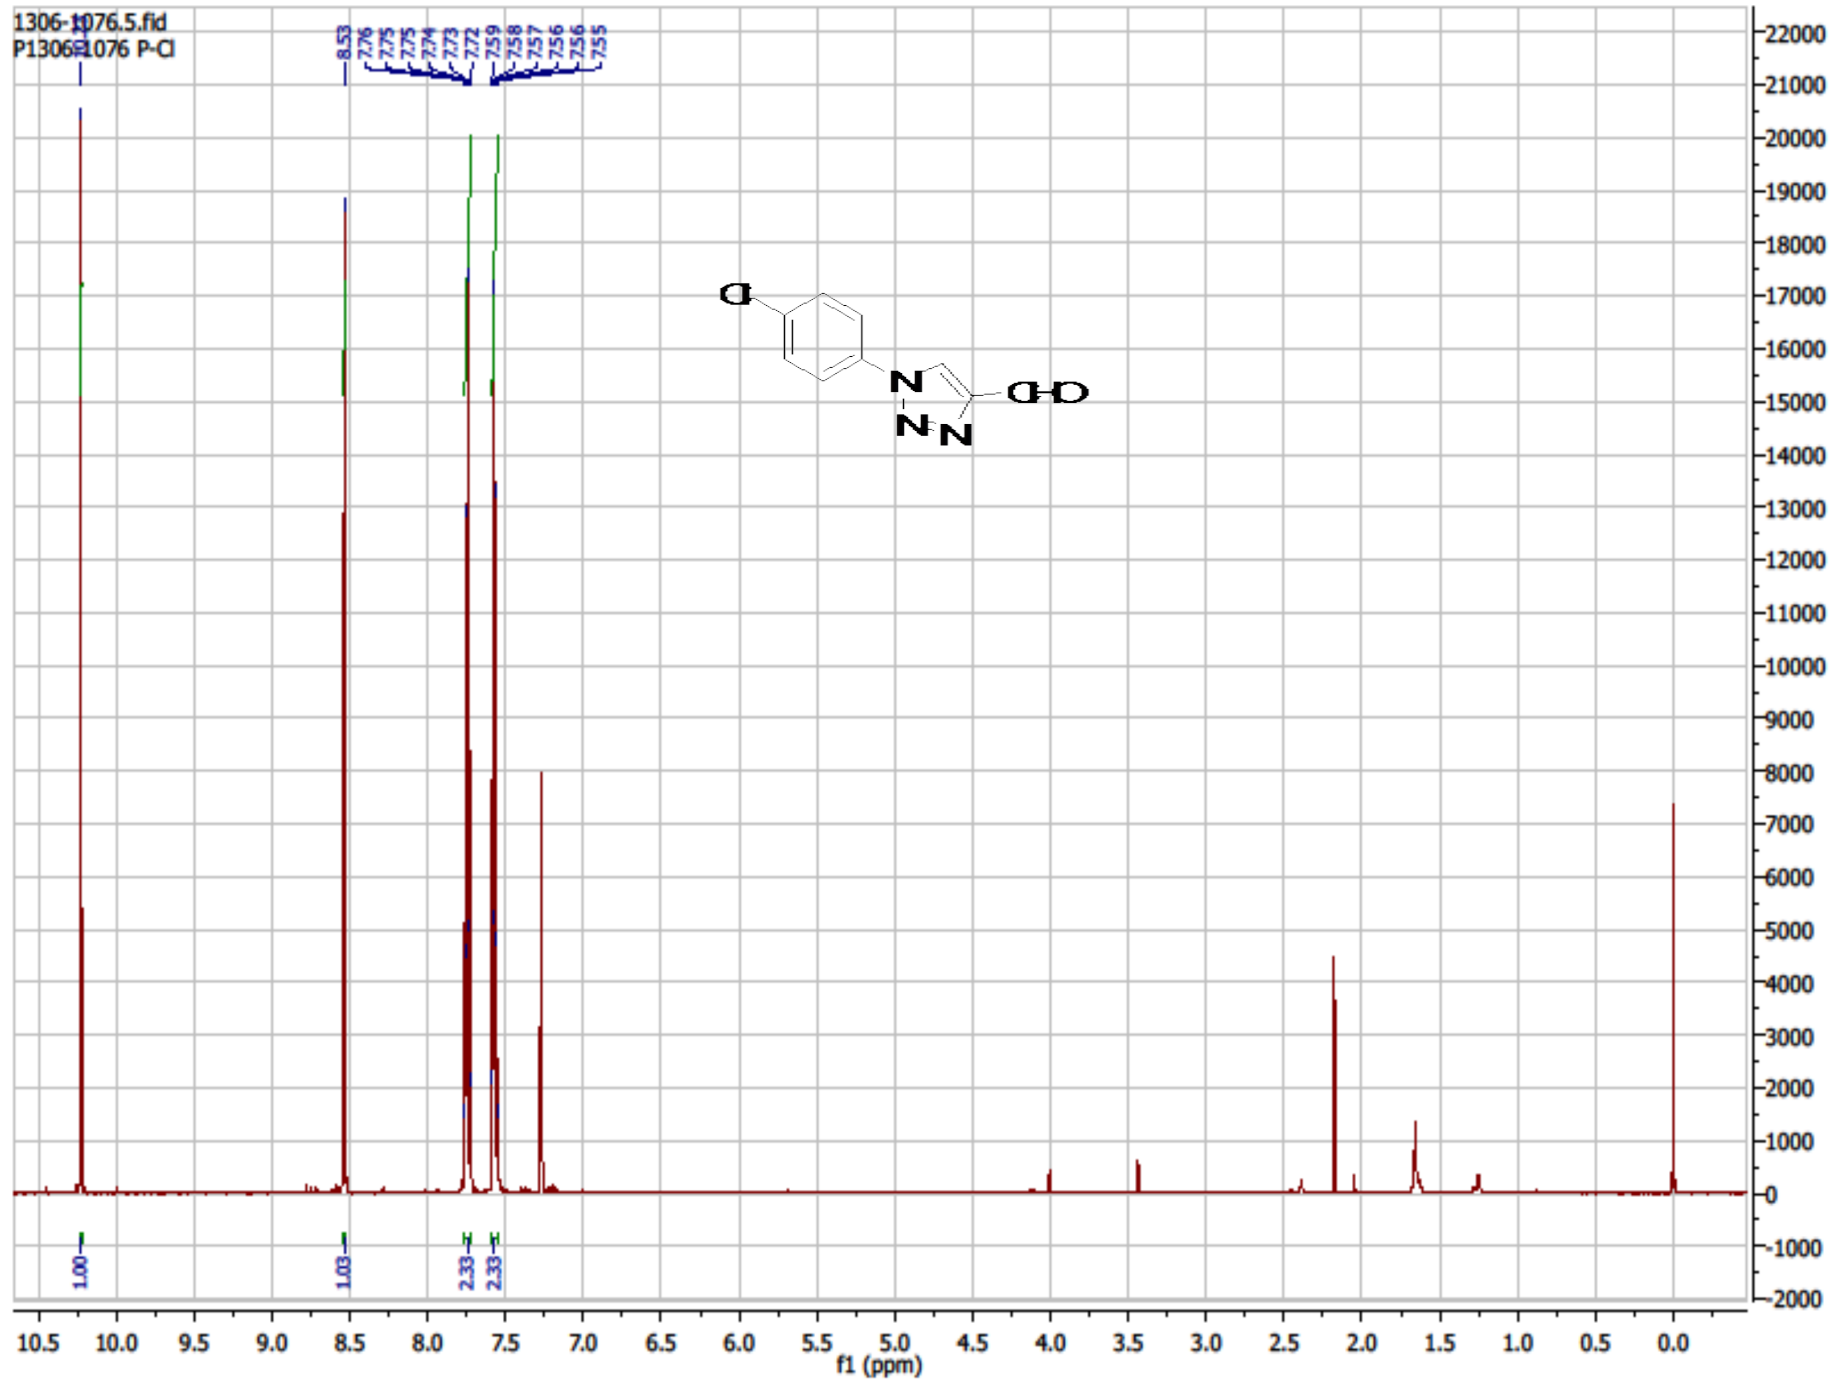

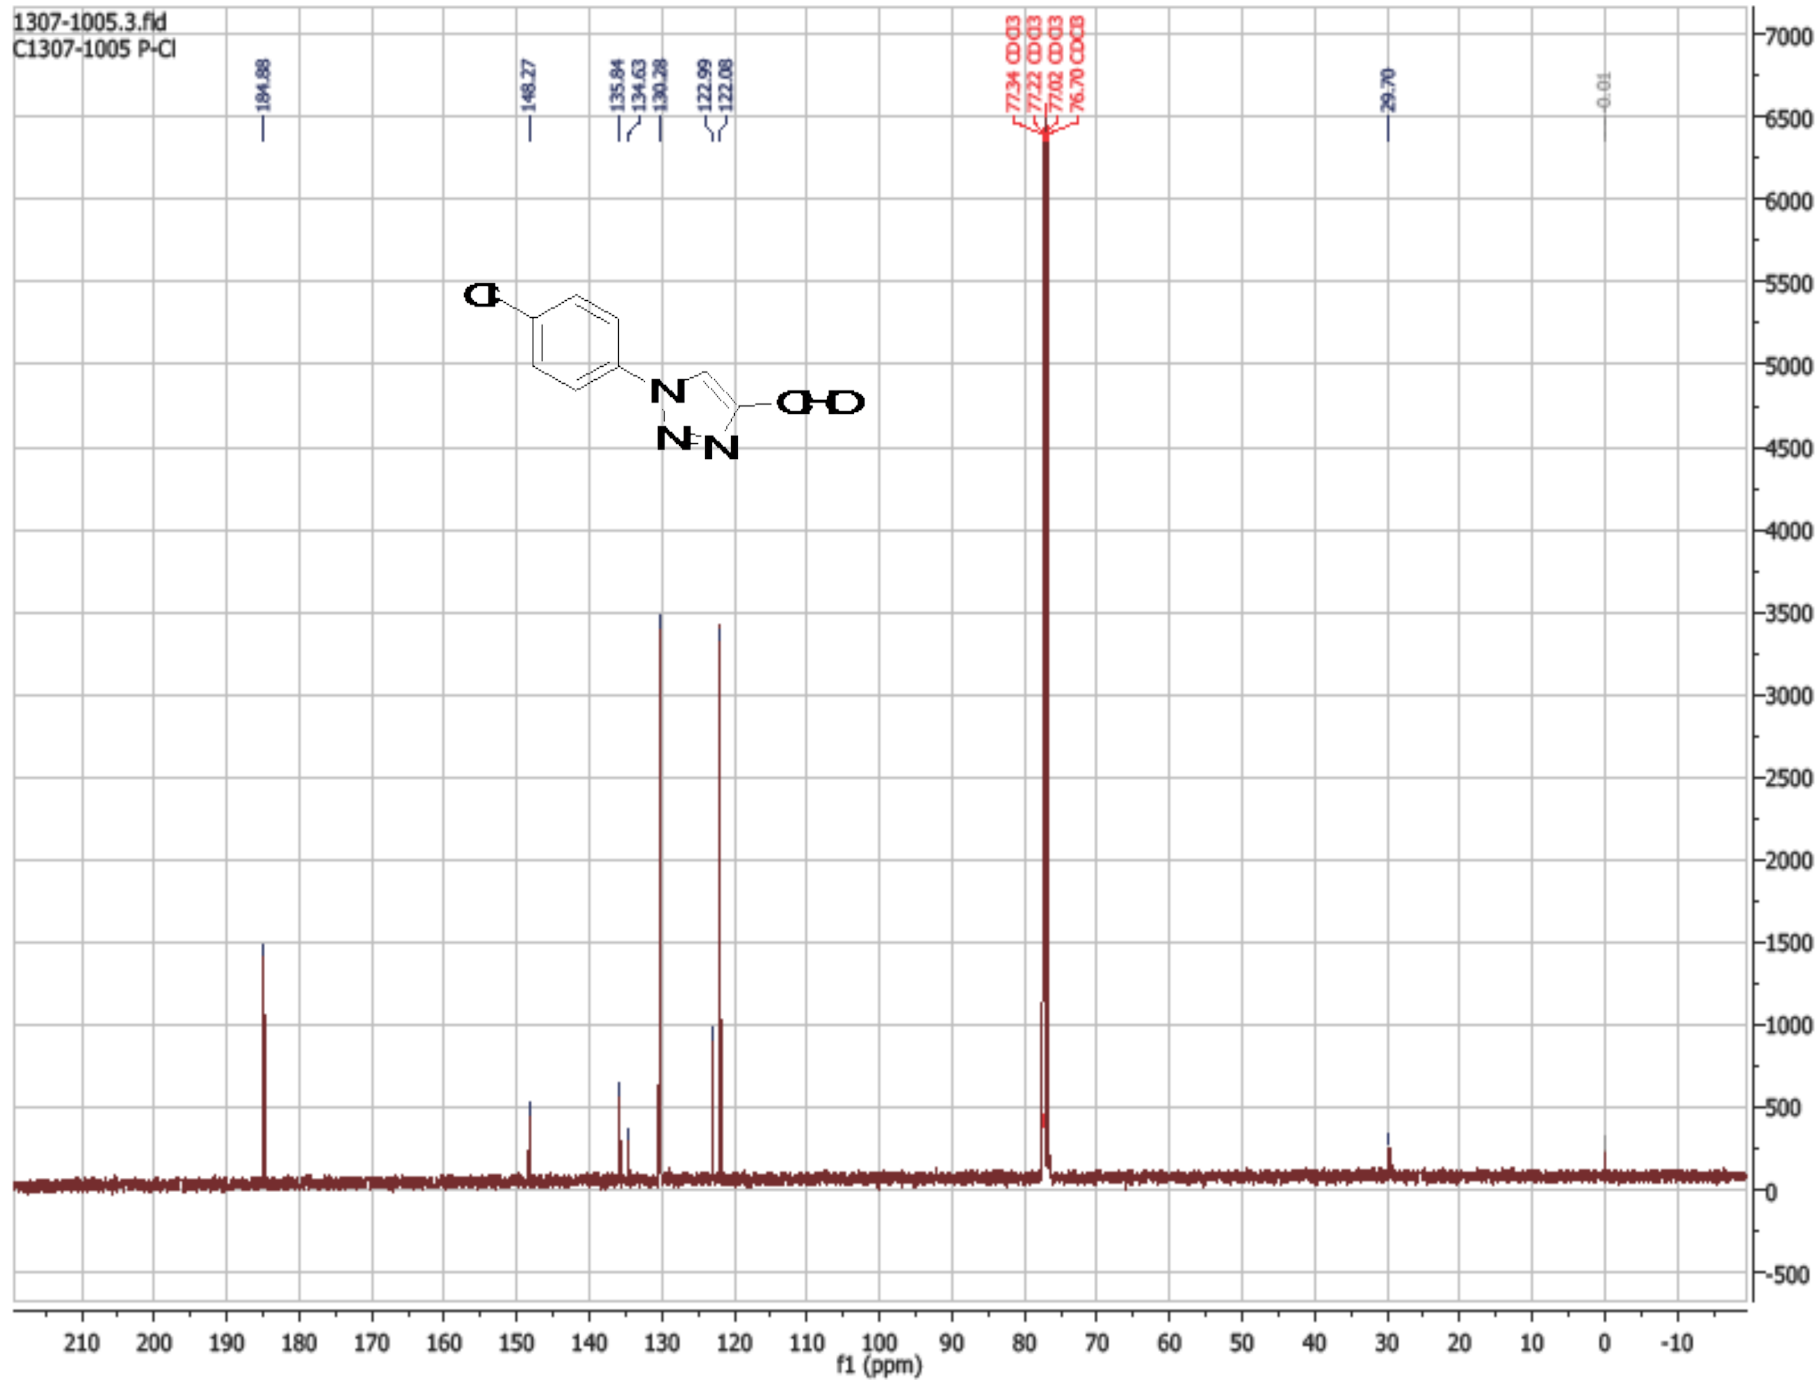

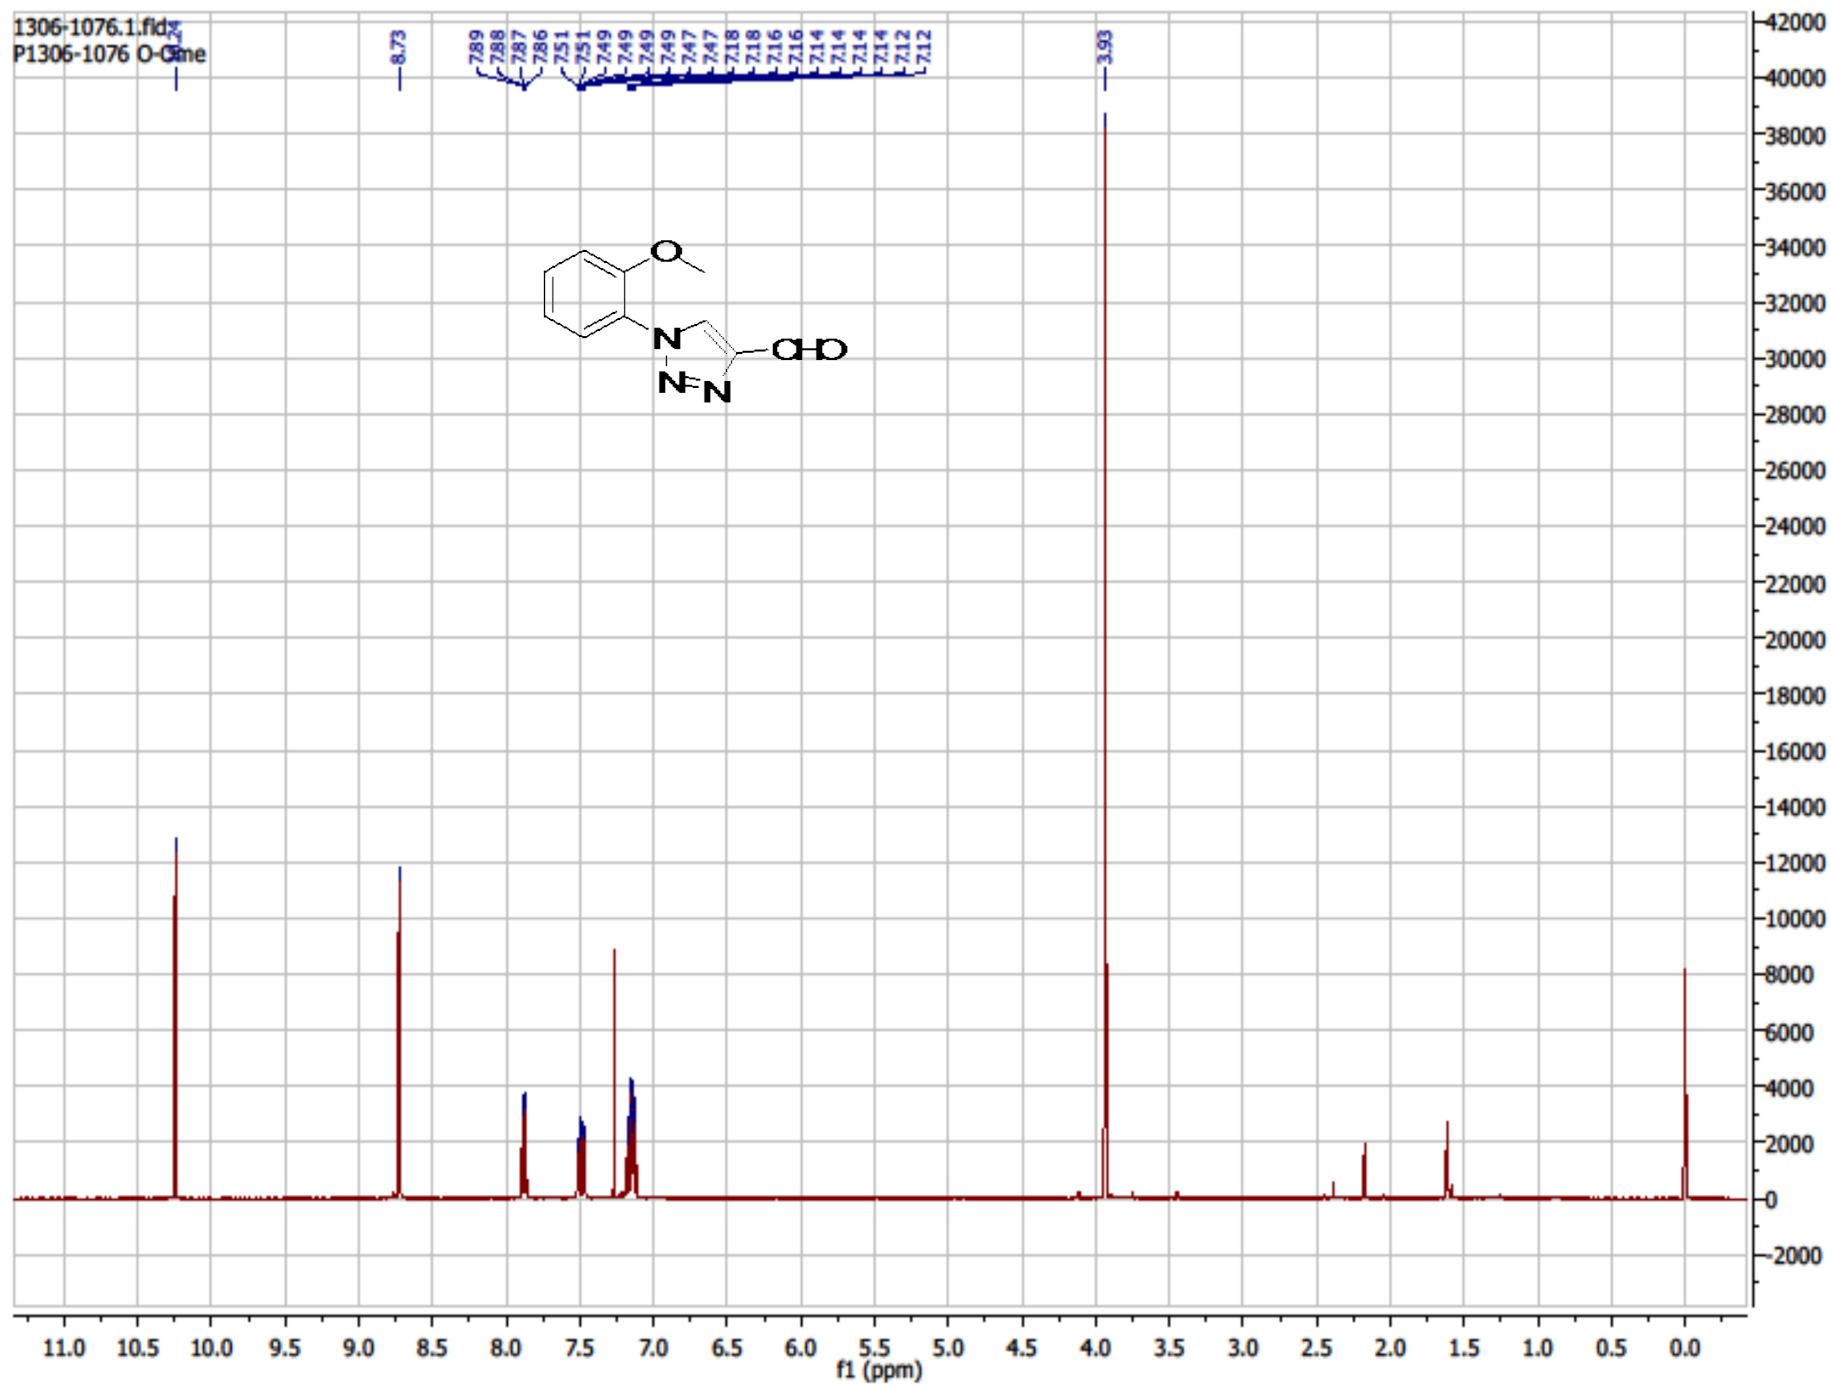

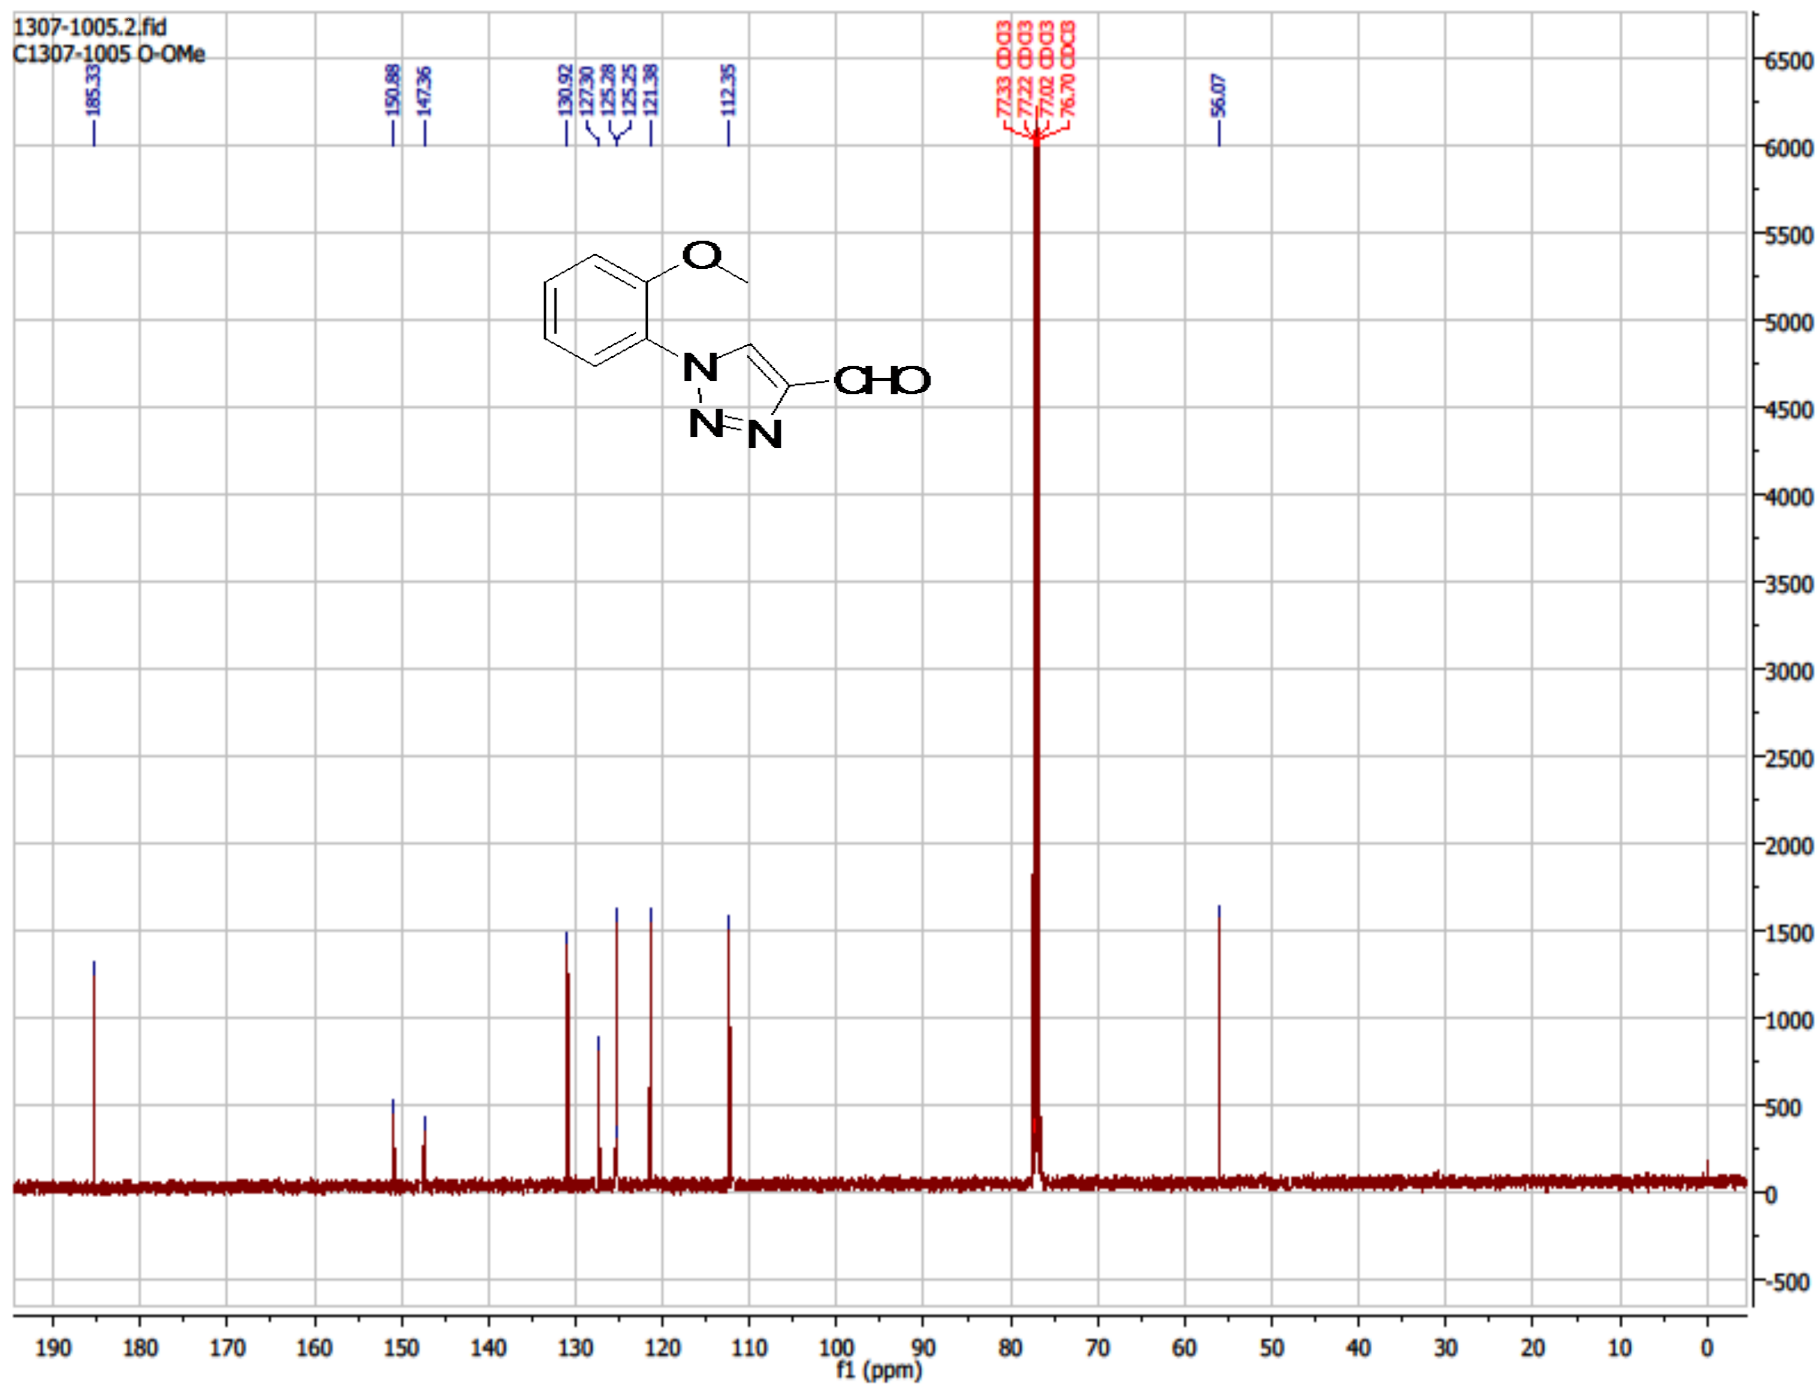

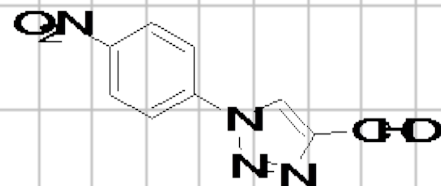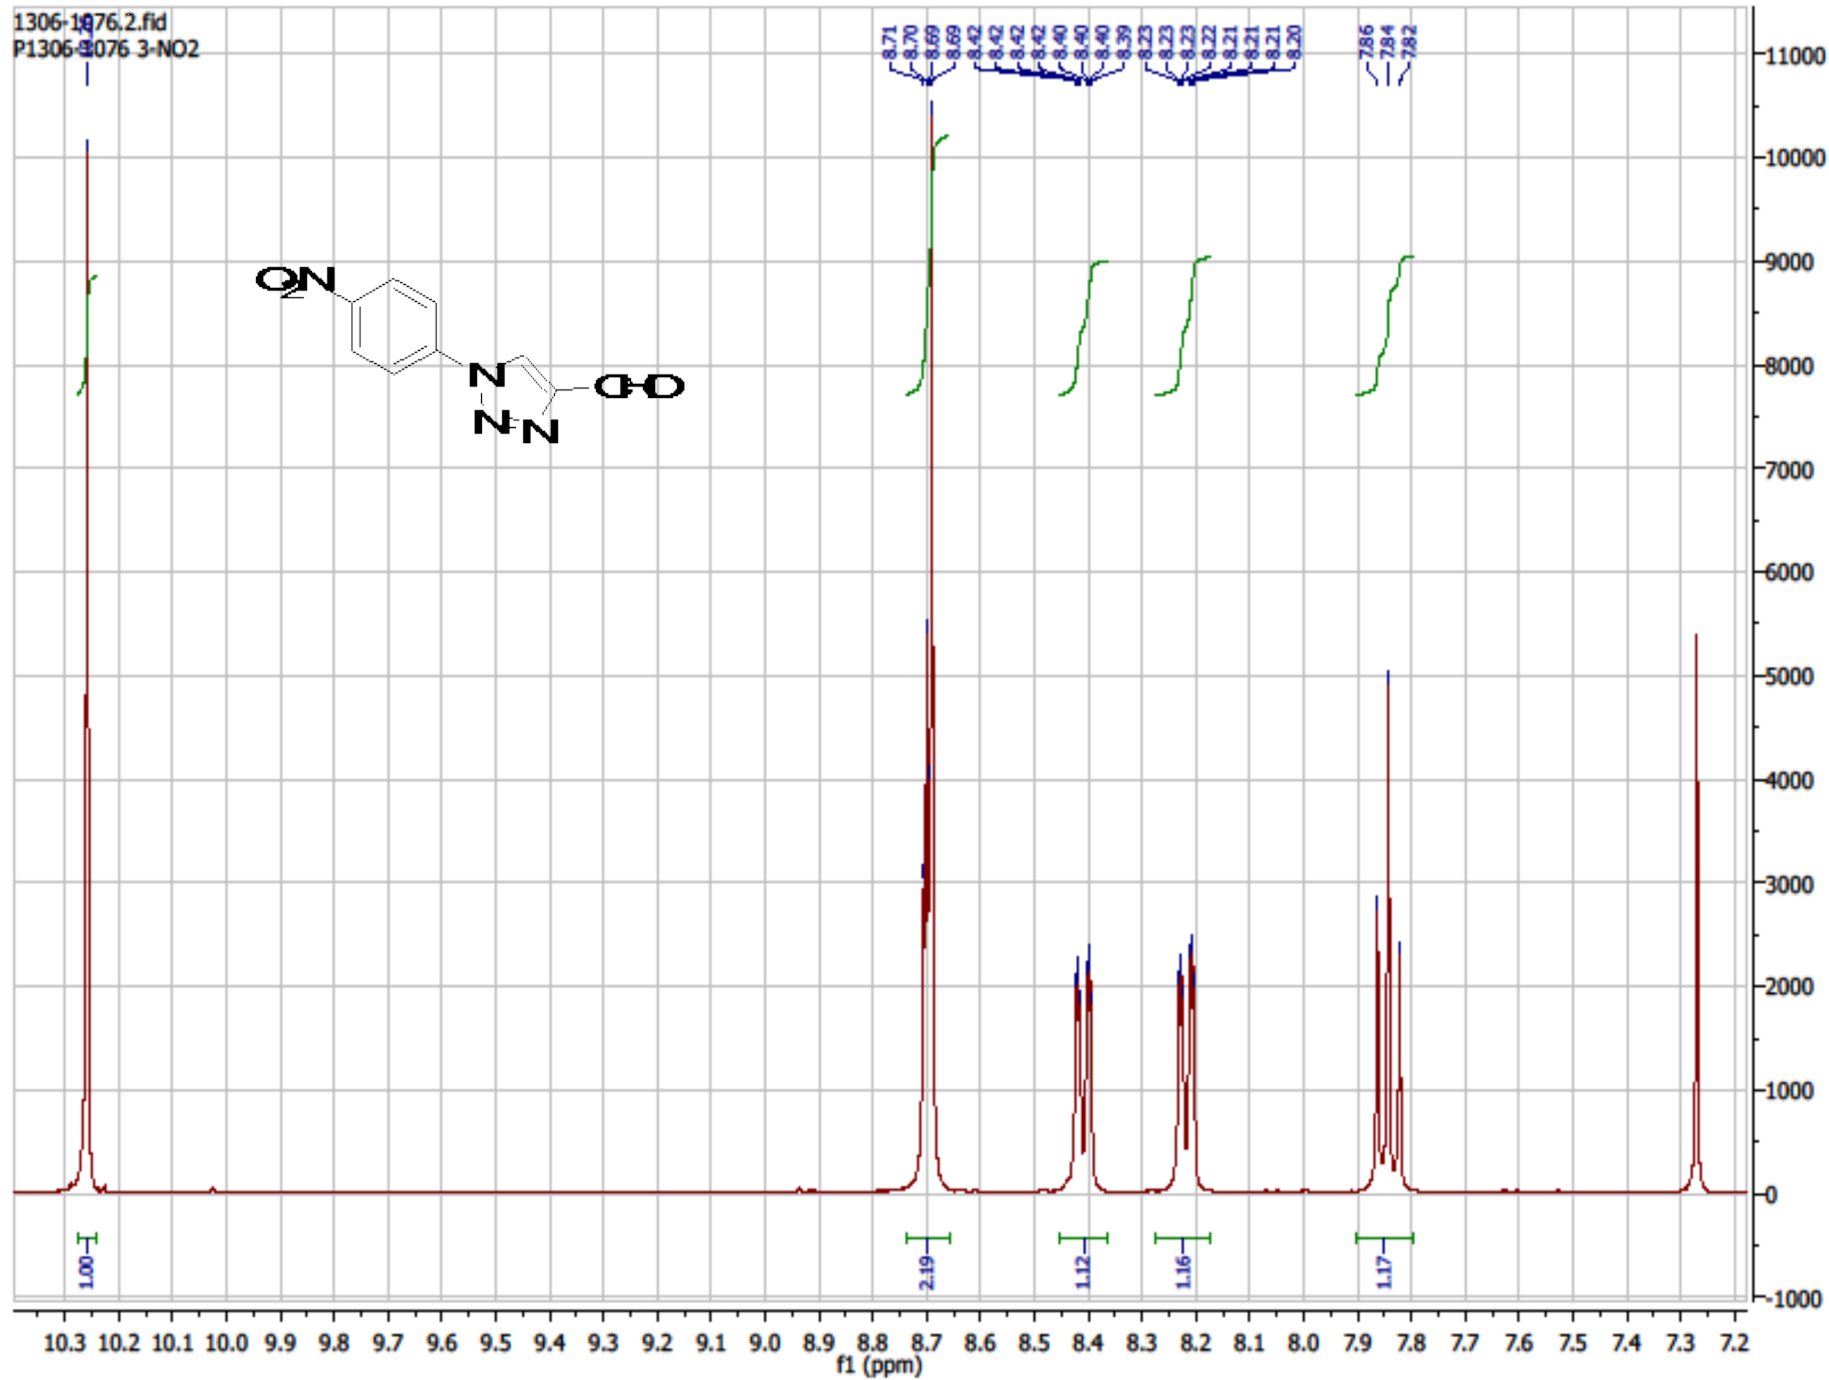

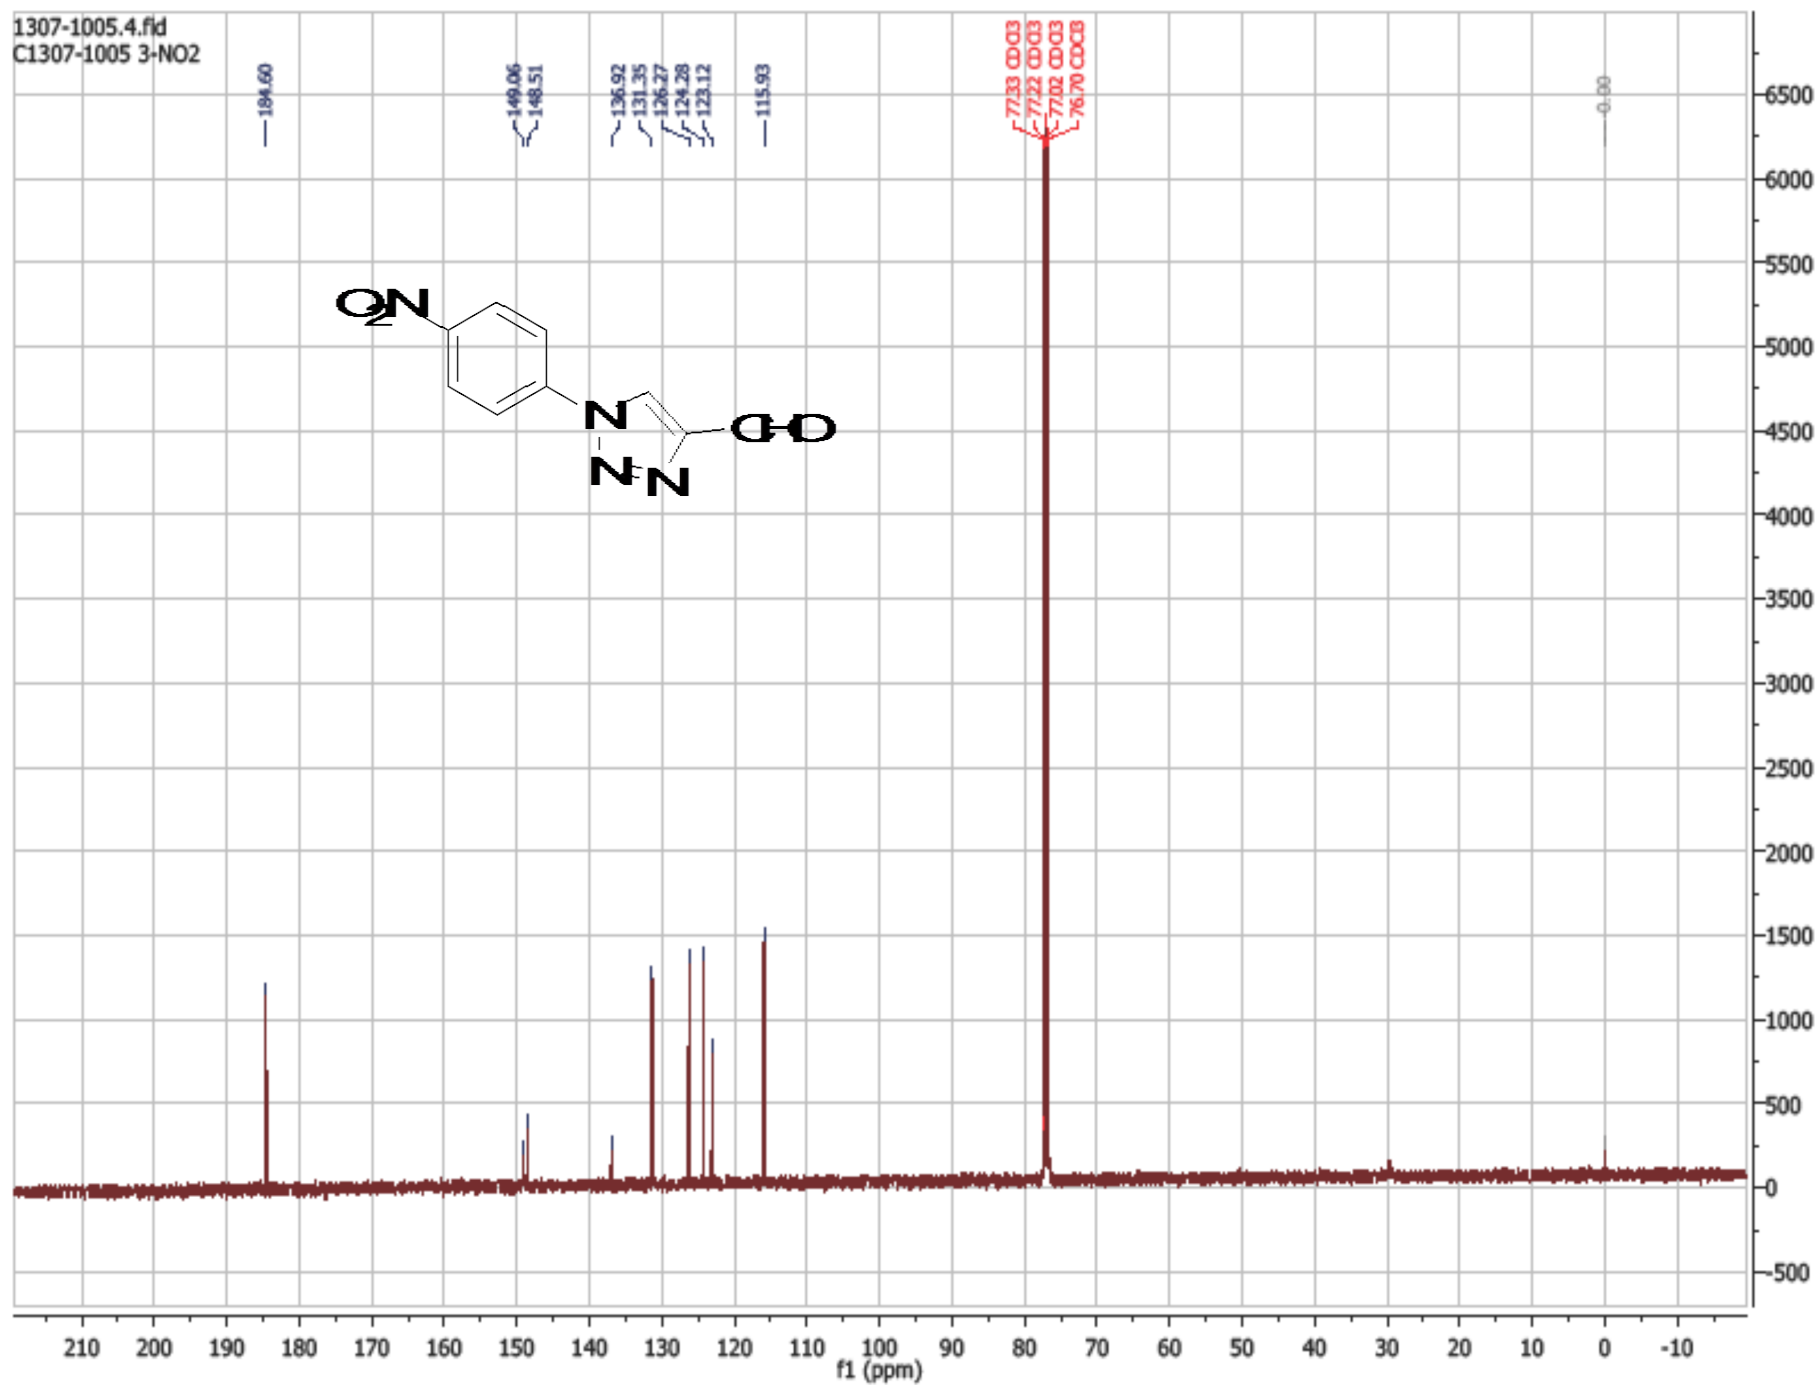

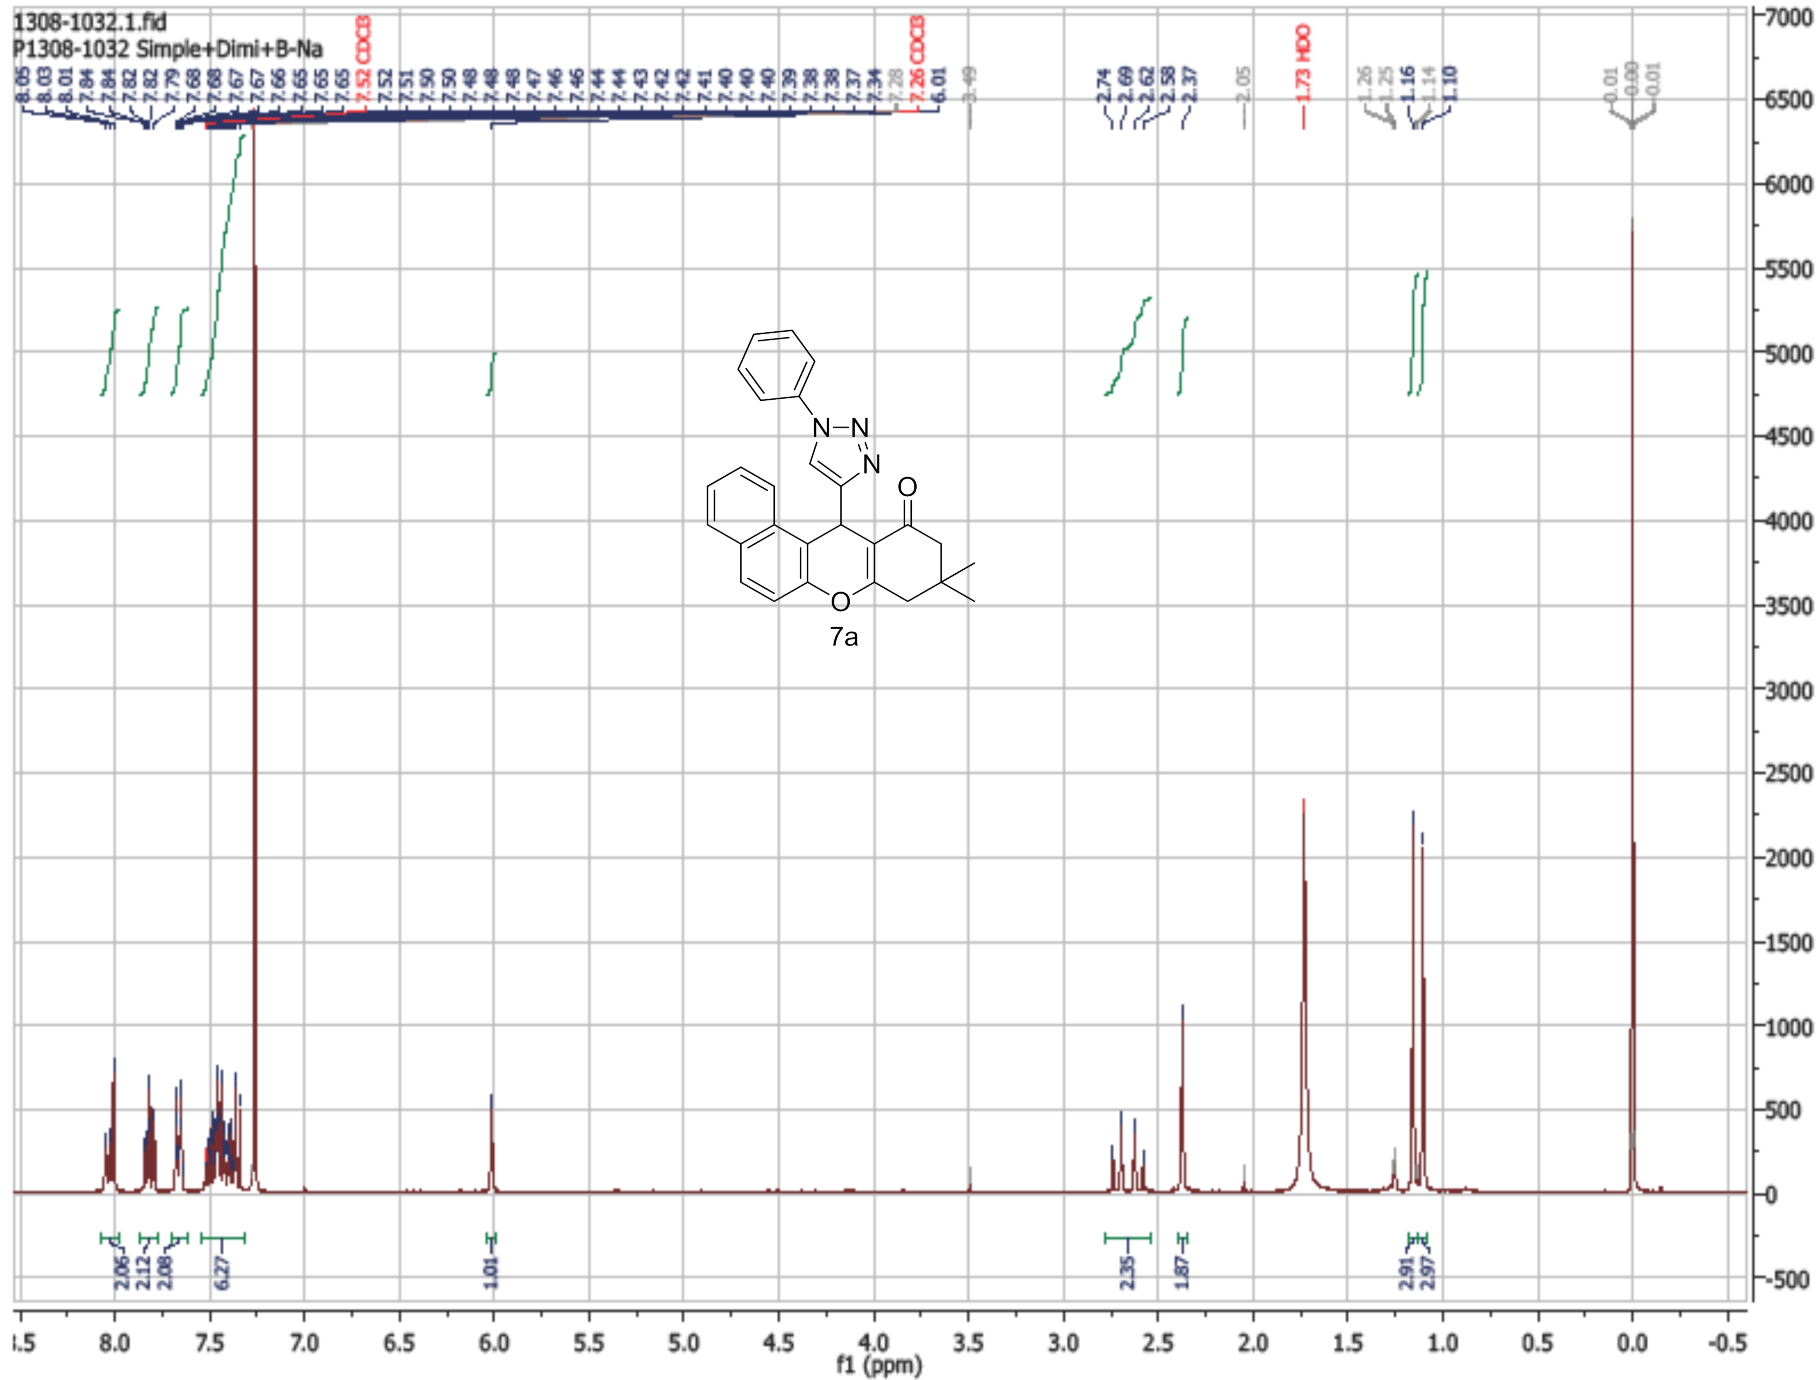

1309-1008.3.fid  
C1309-1008 Simple+Dimi+B-Nap

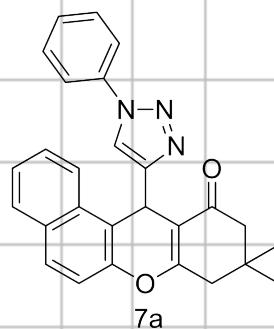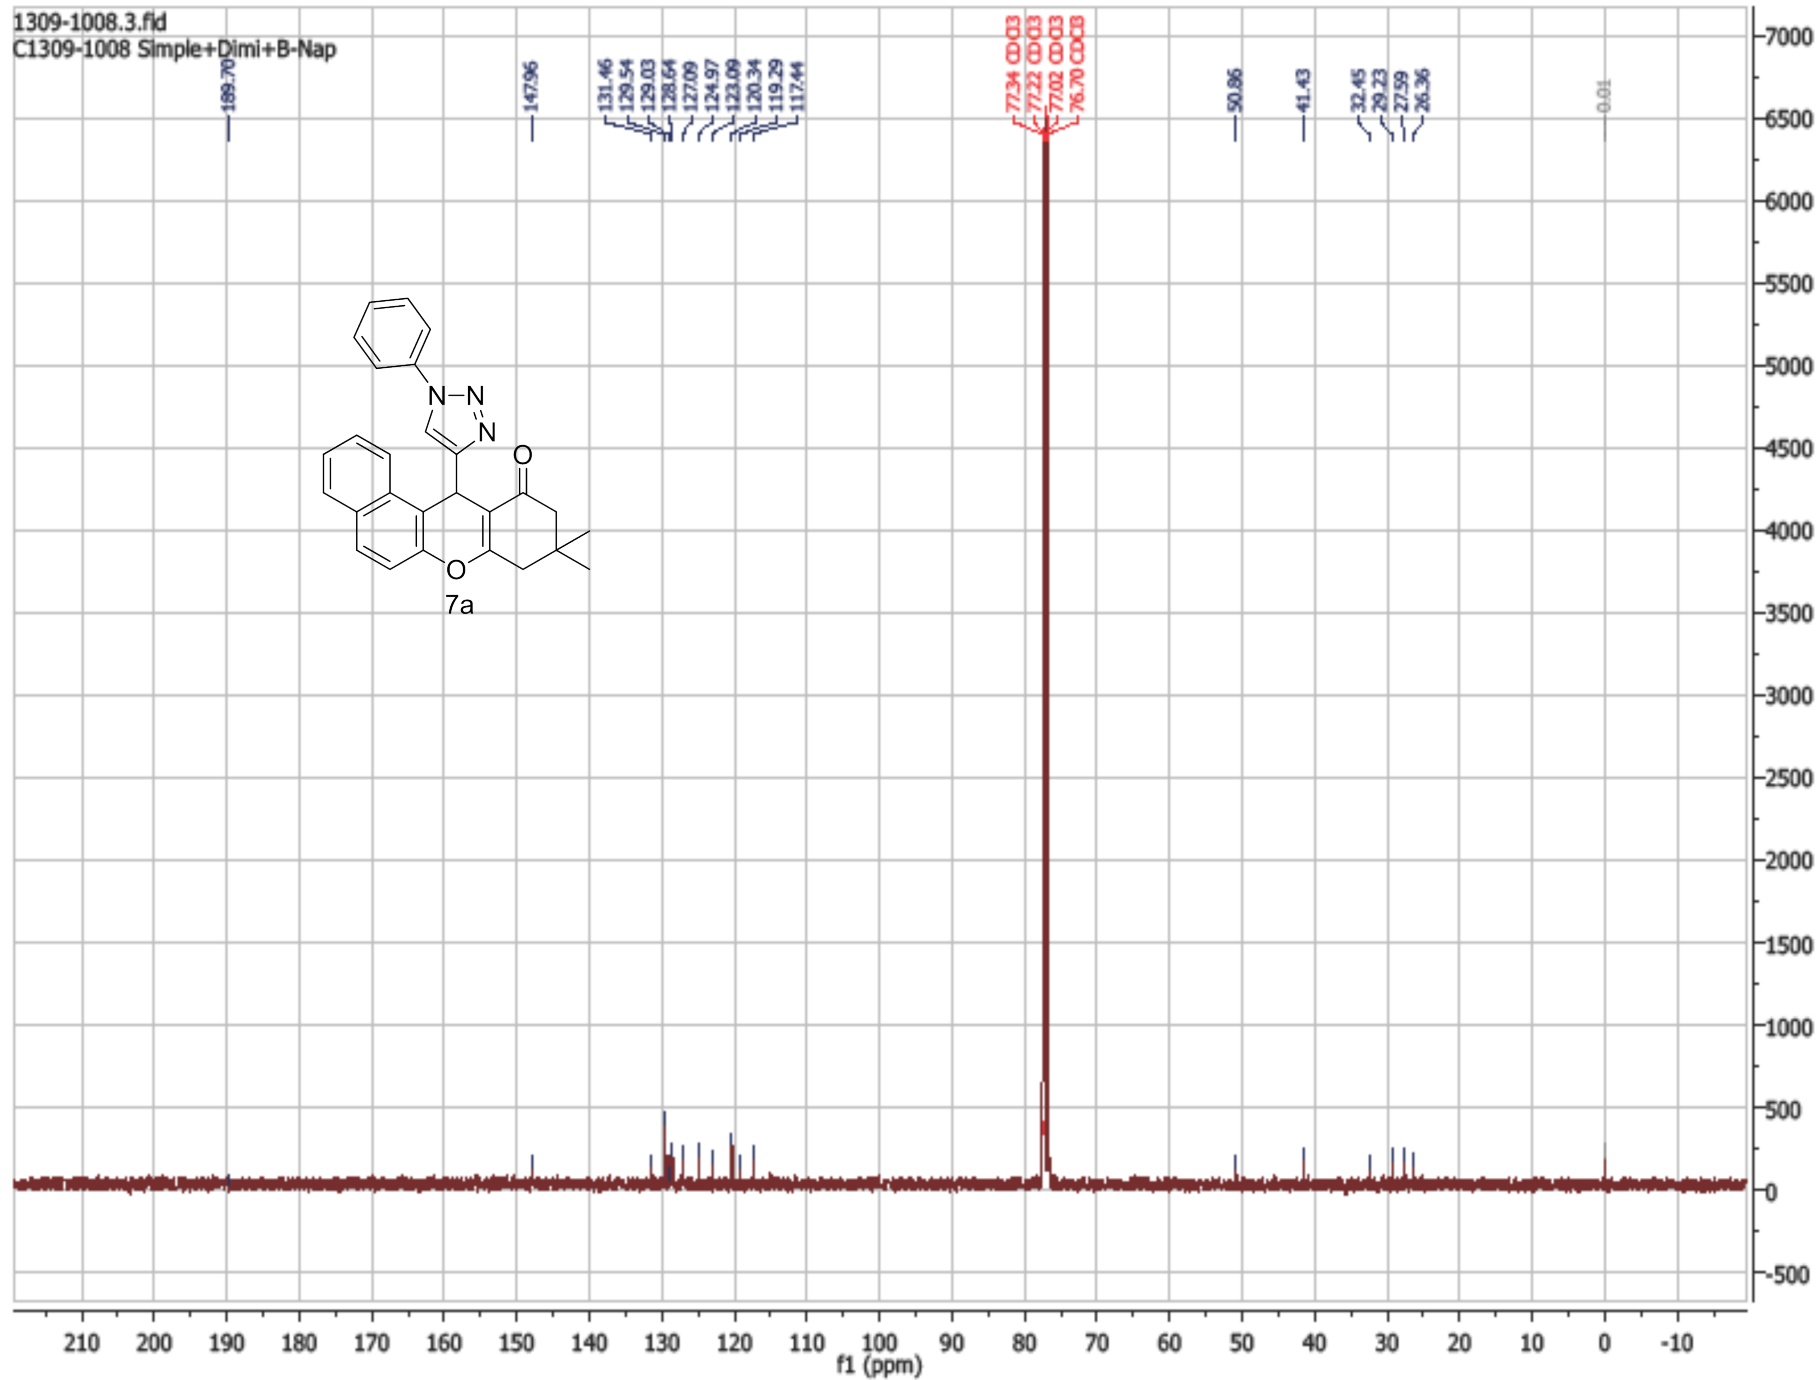



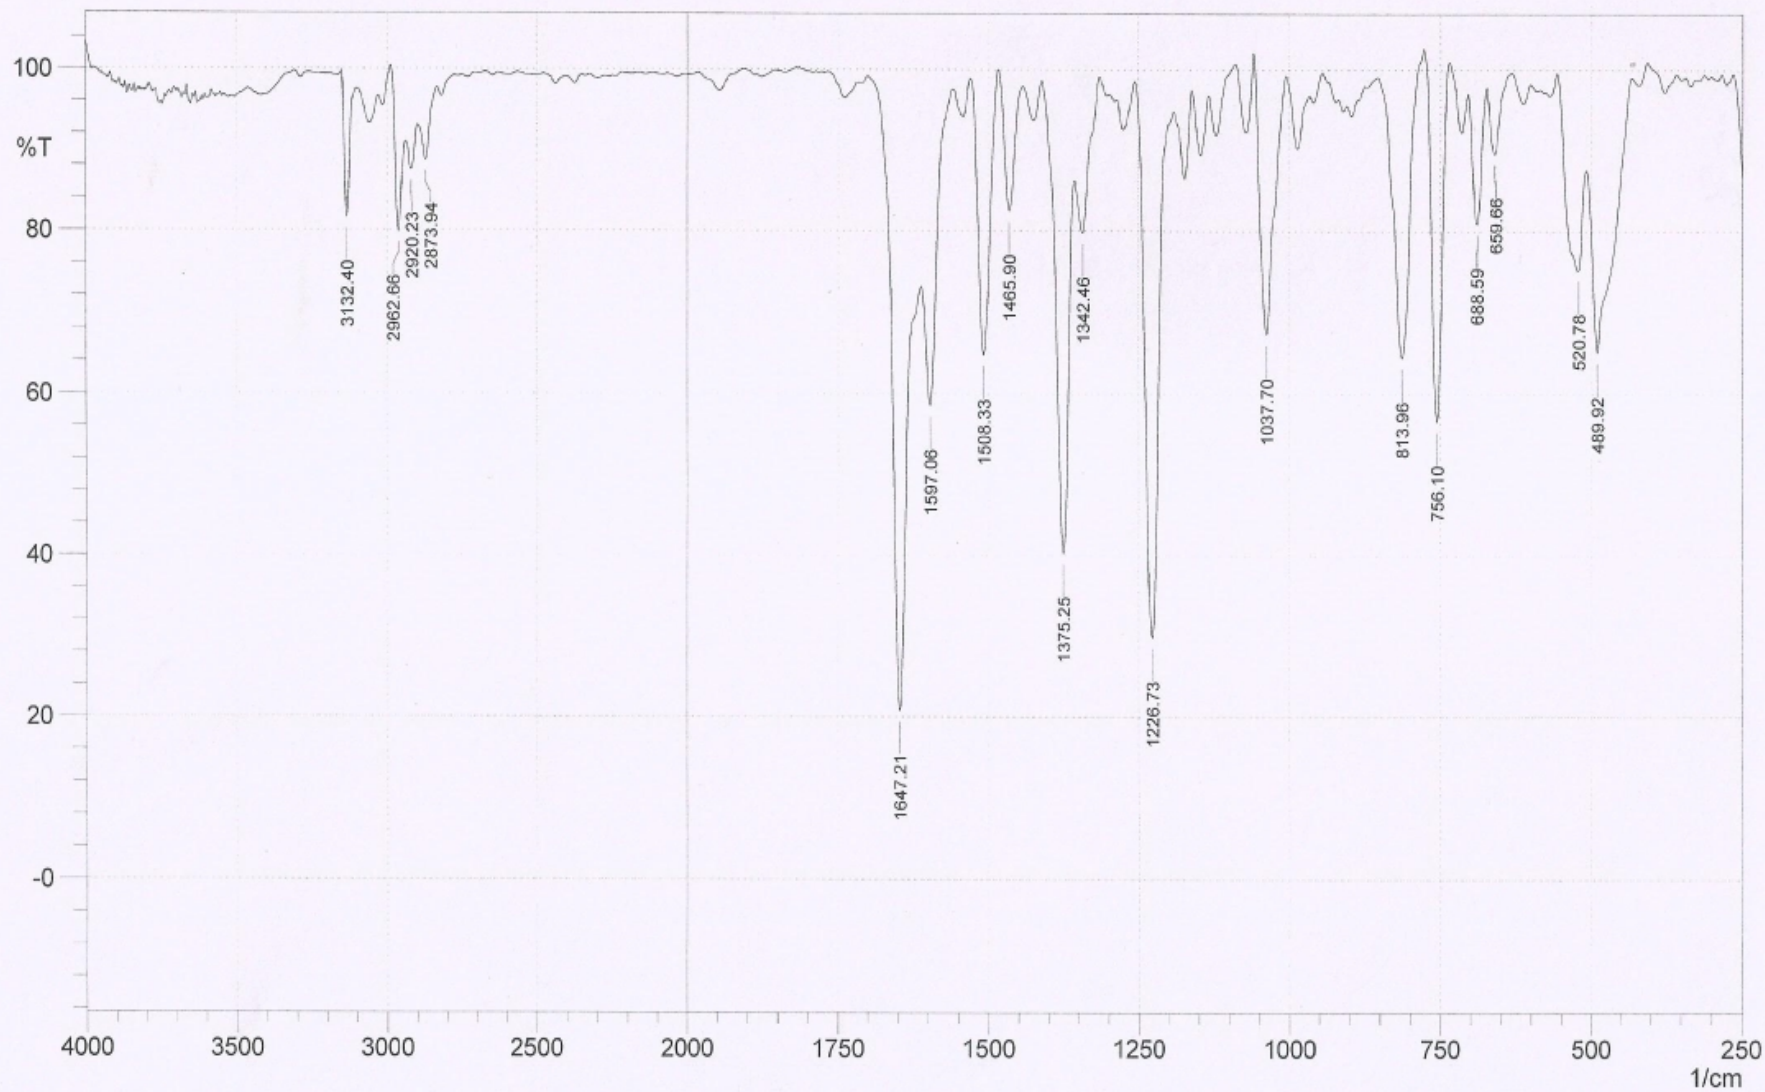

Comment;

No. of Scans;

Resolution;

Apodization;

Date/Time; 3/8/2016 2:26:51 PM

User; user

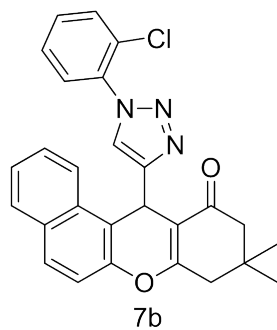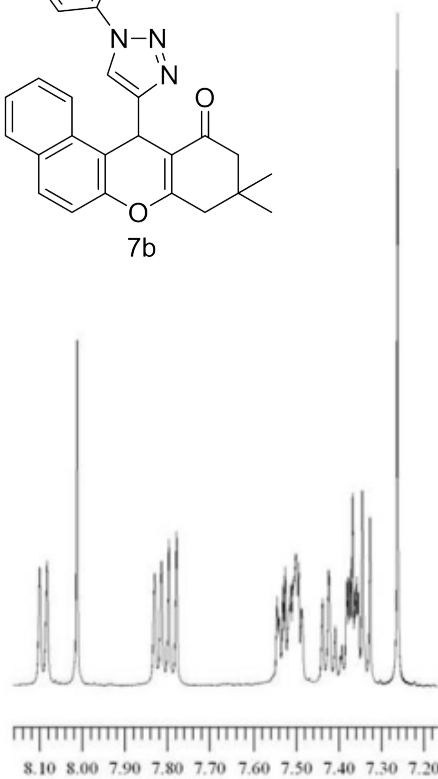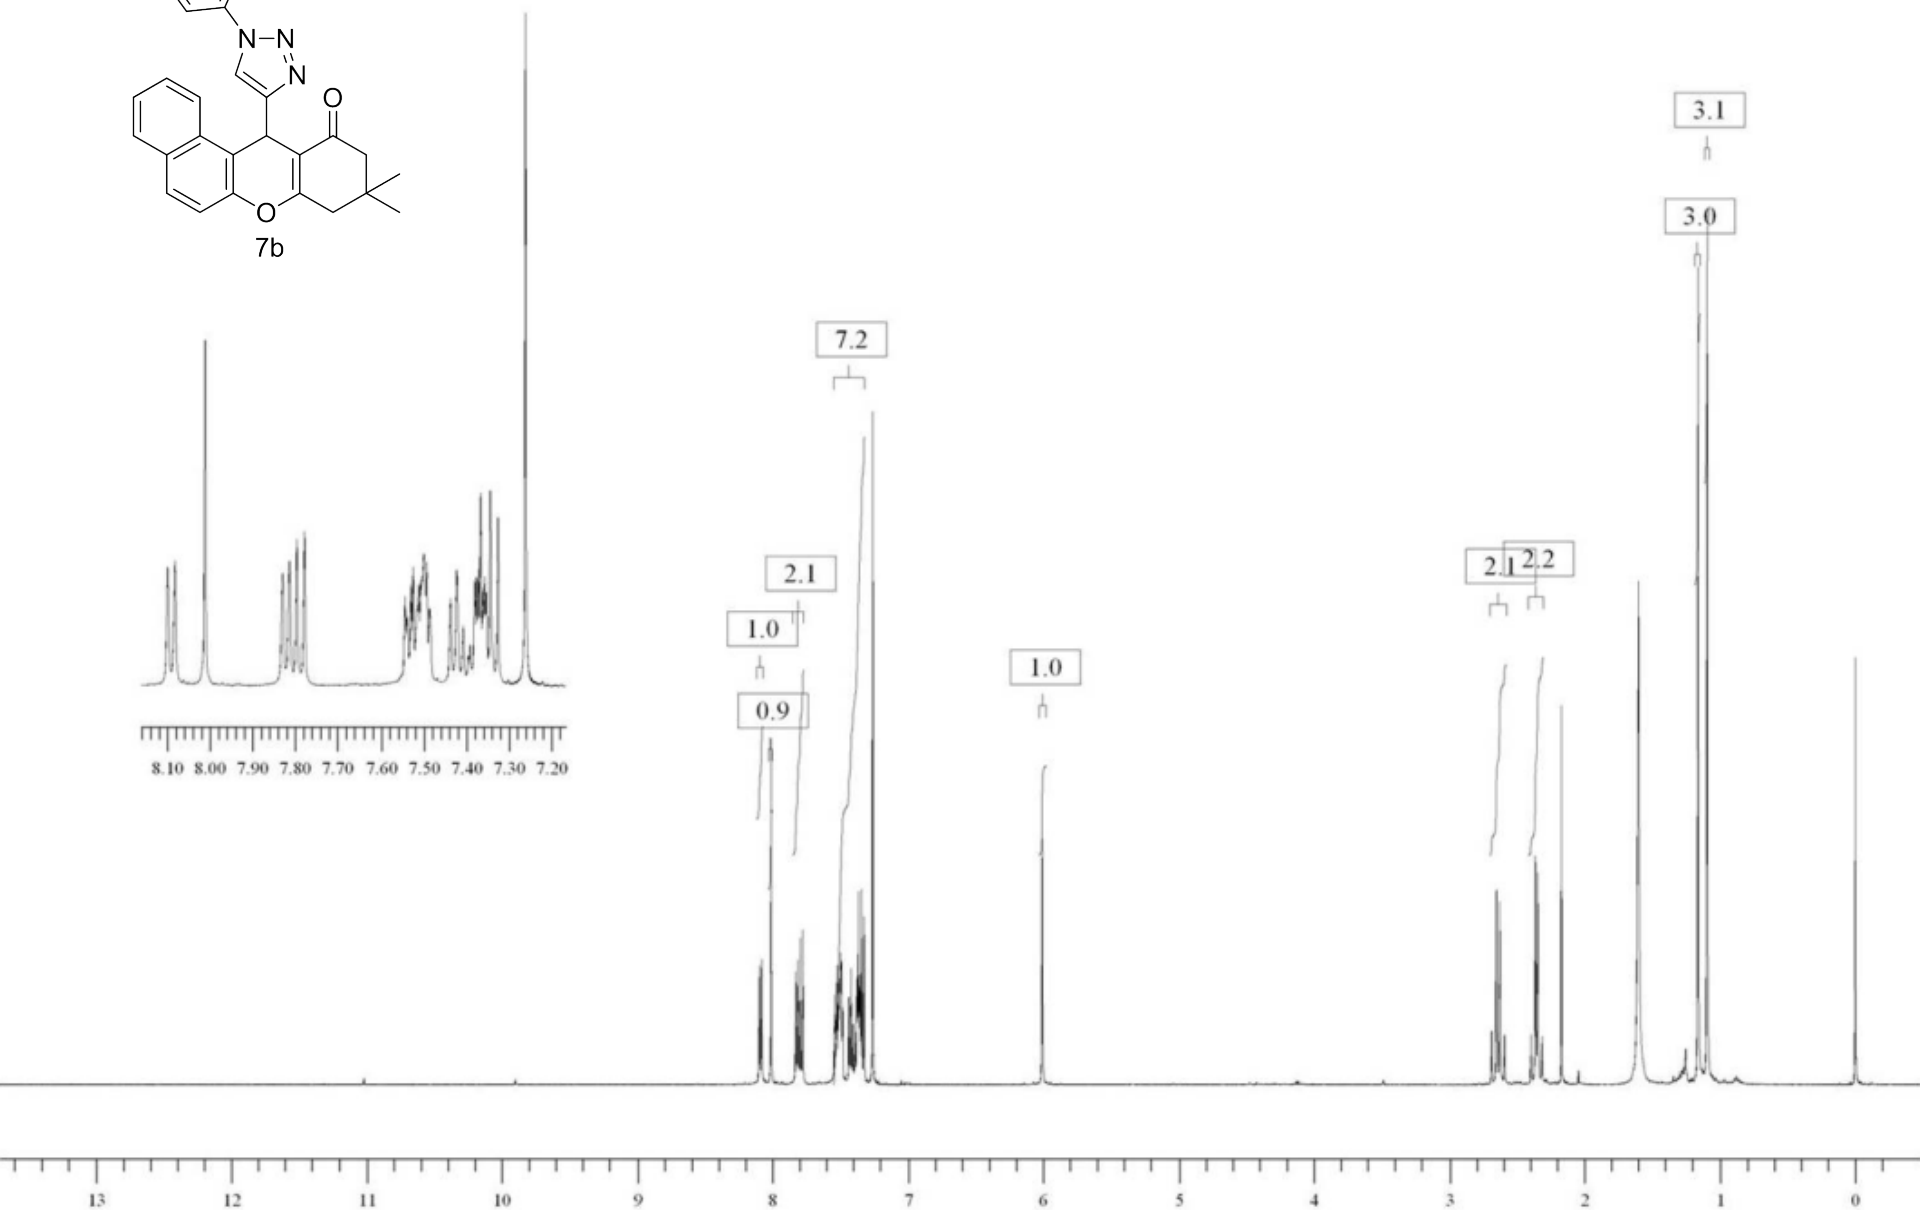

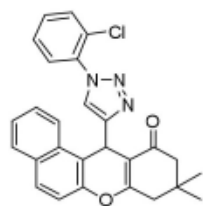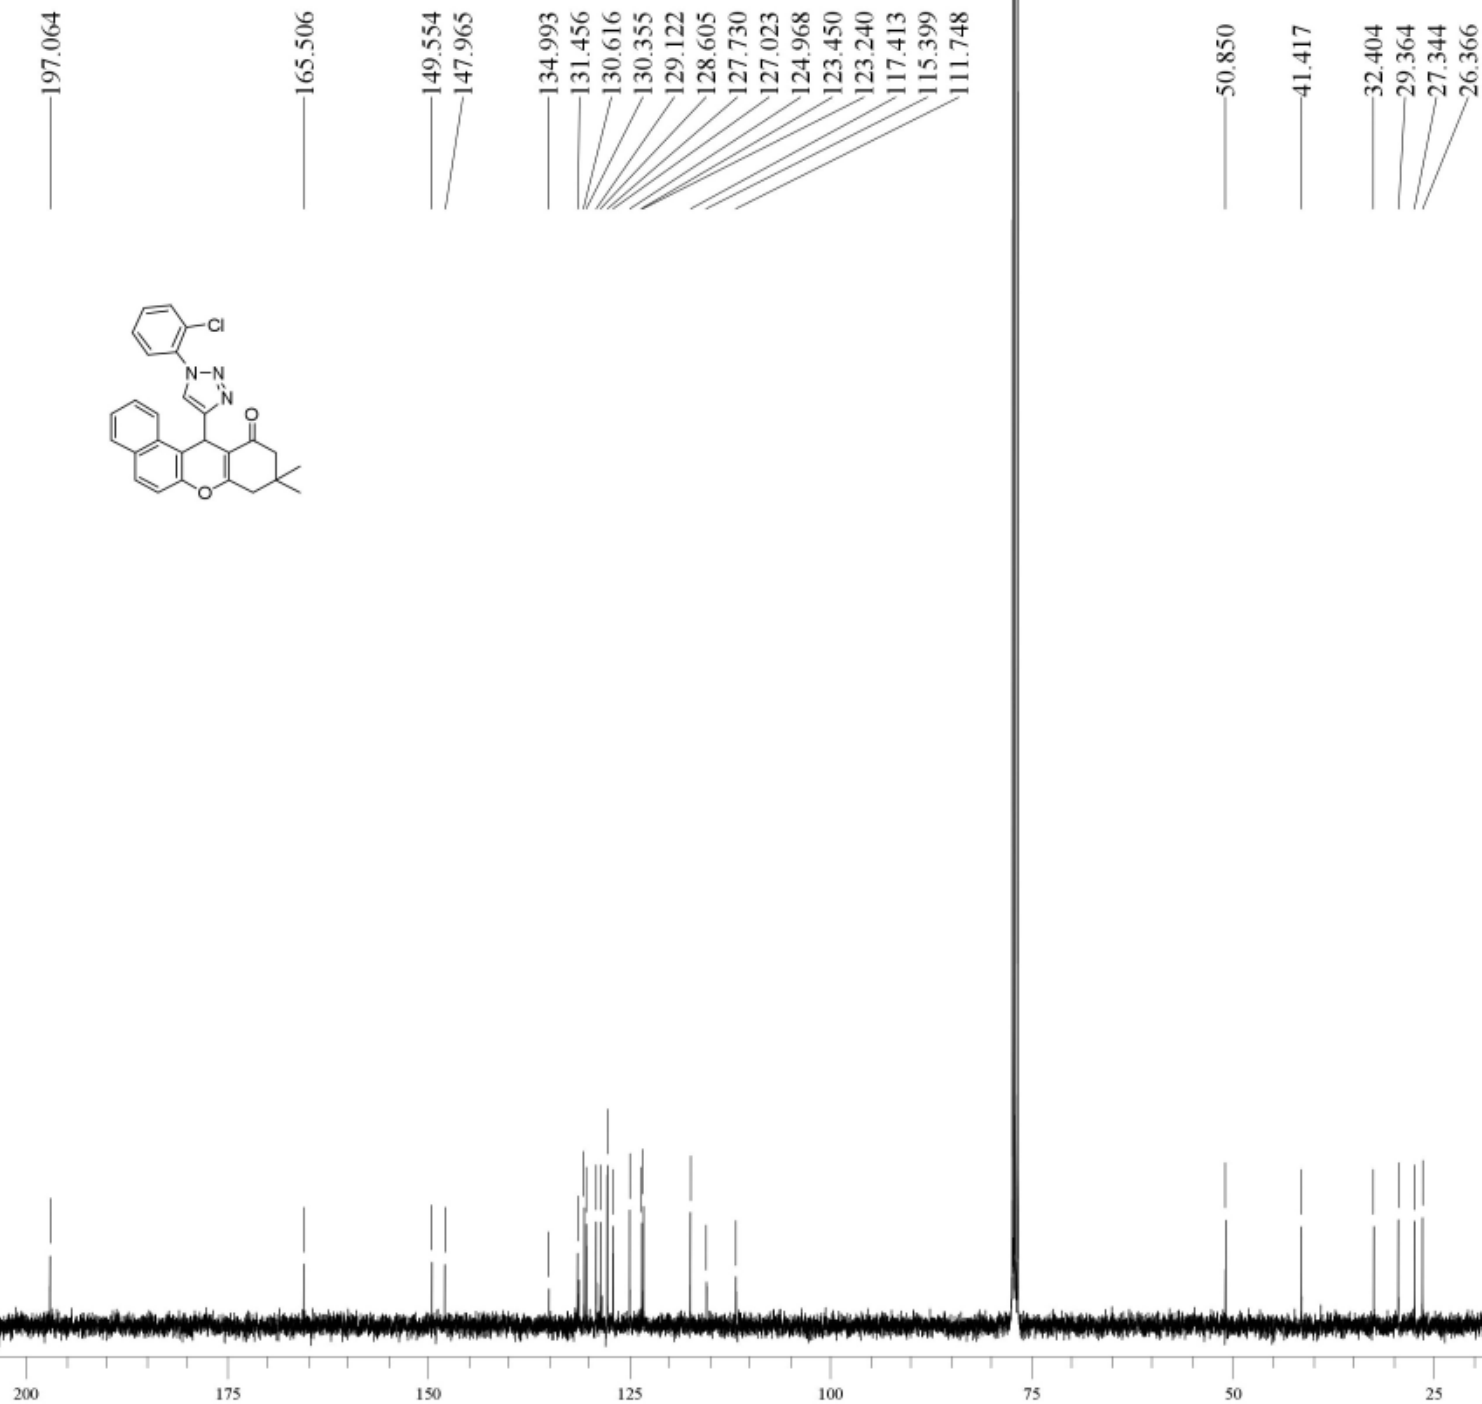

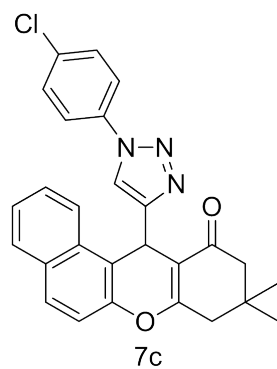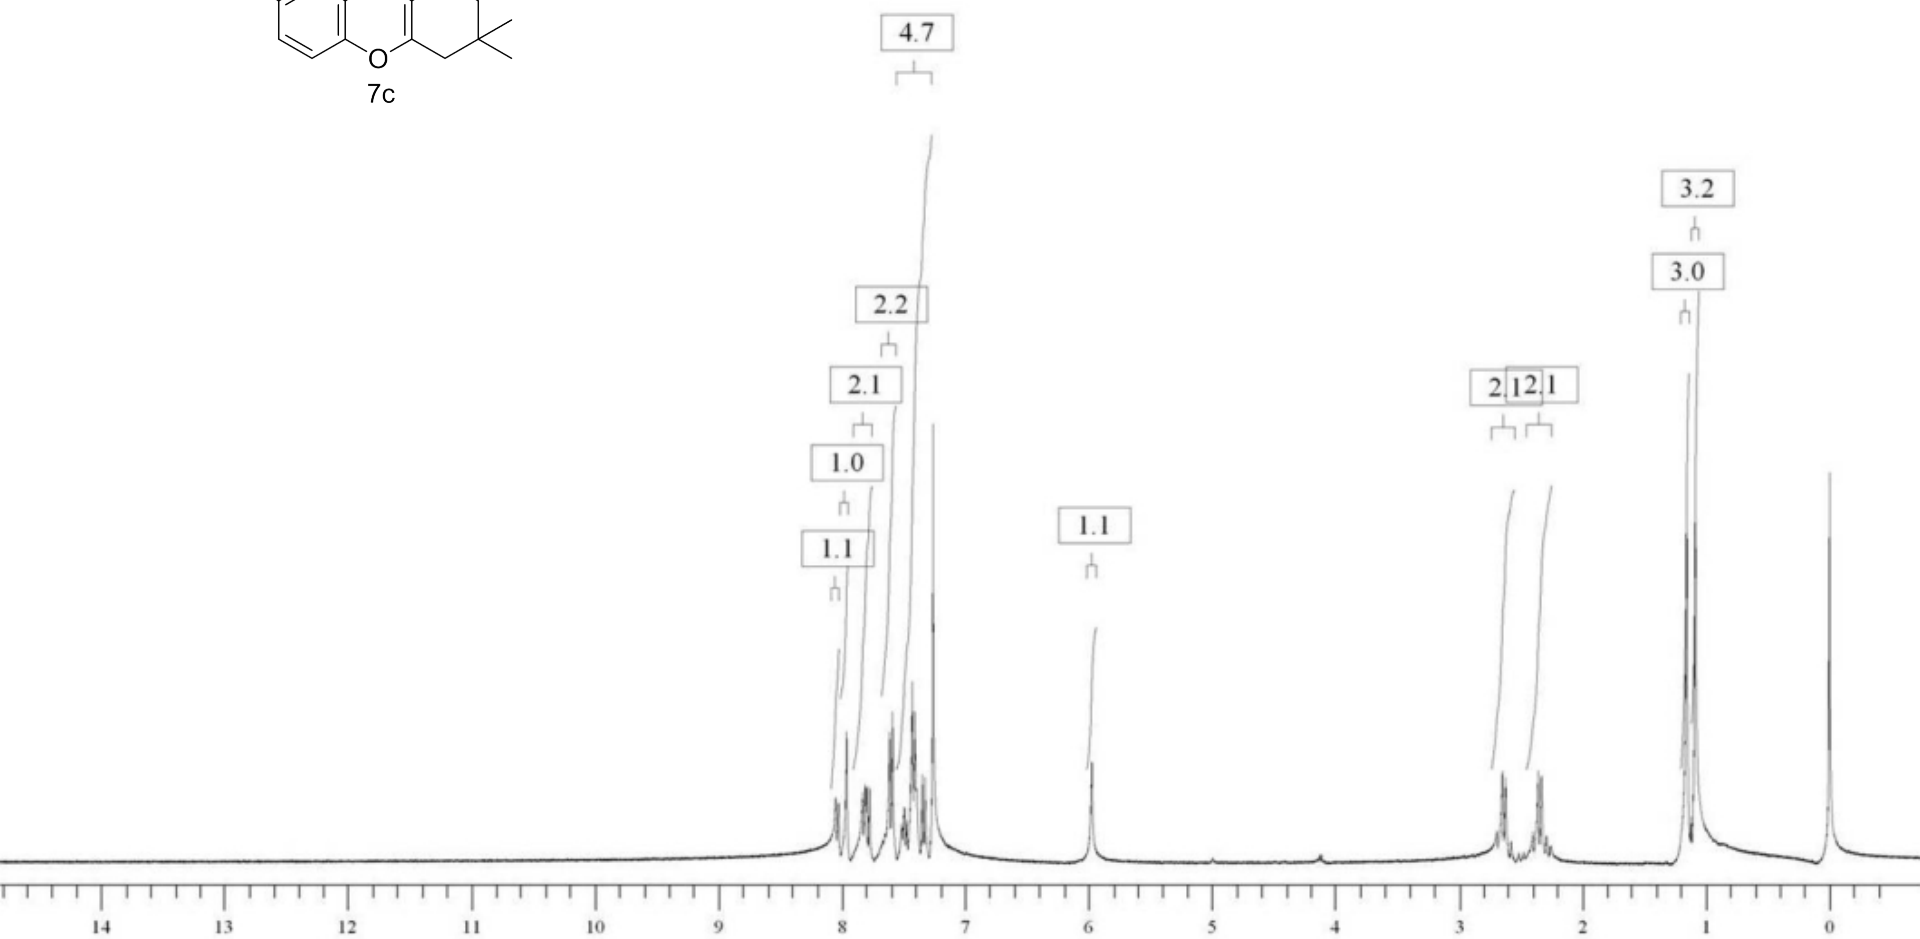

1309-1008.2.fid  
C1309-1008 P-Cl+Dimi+B-NA

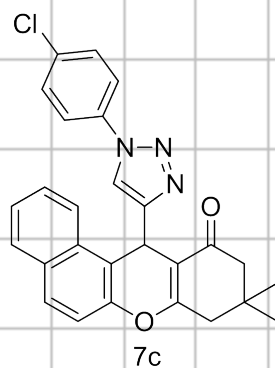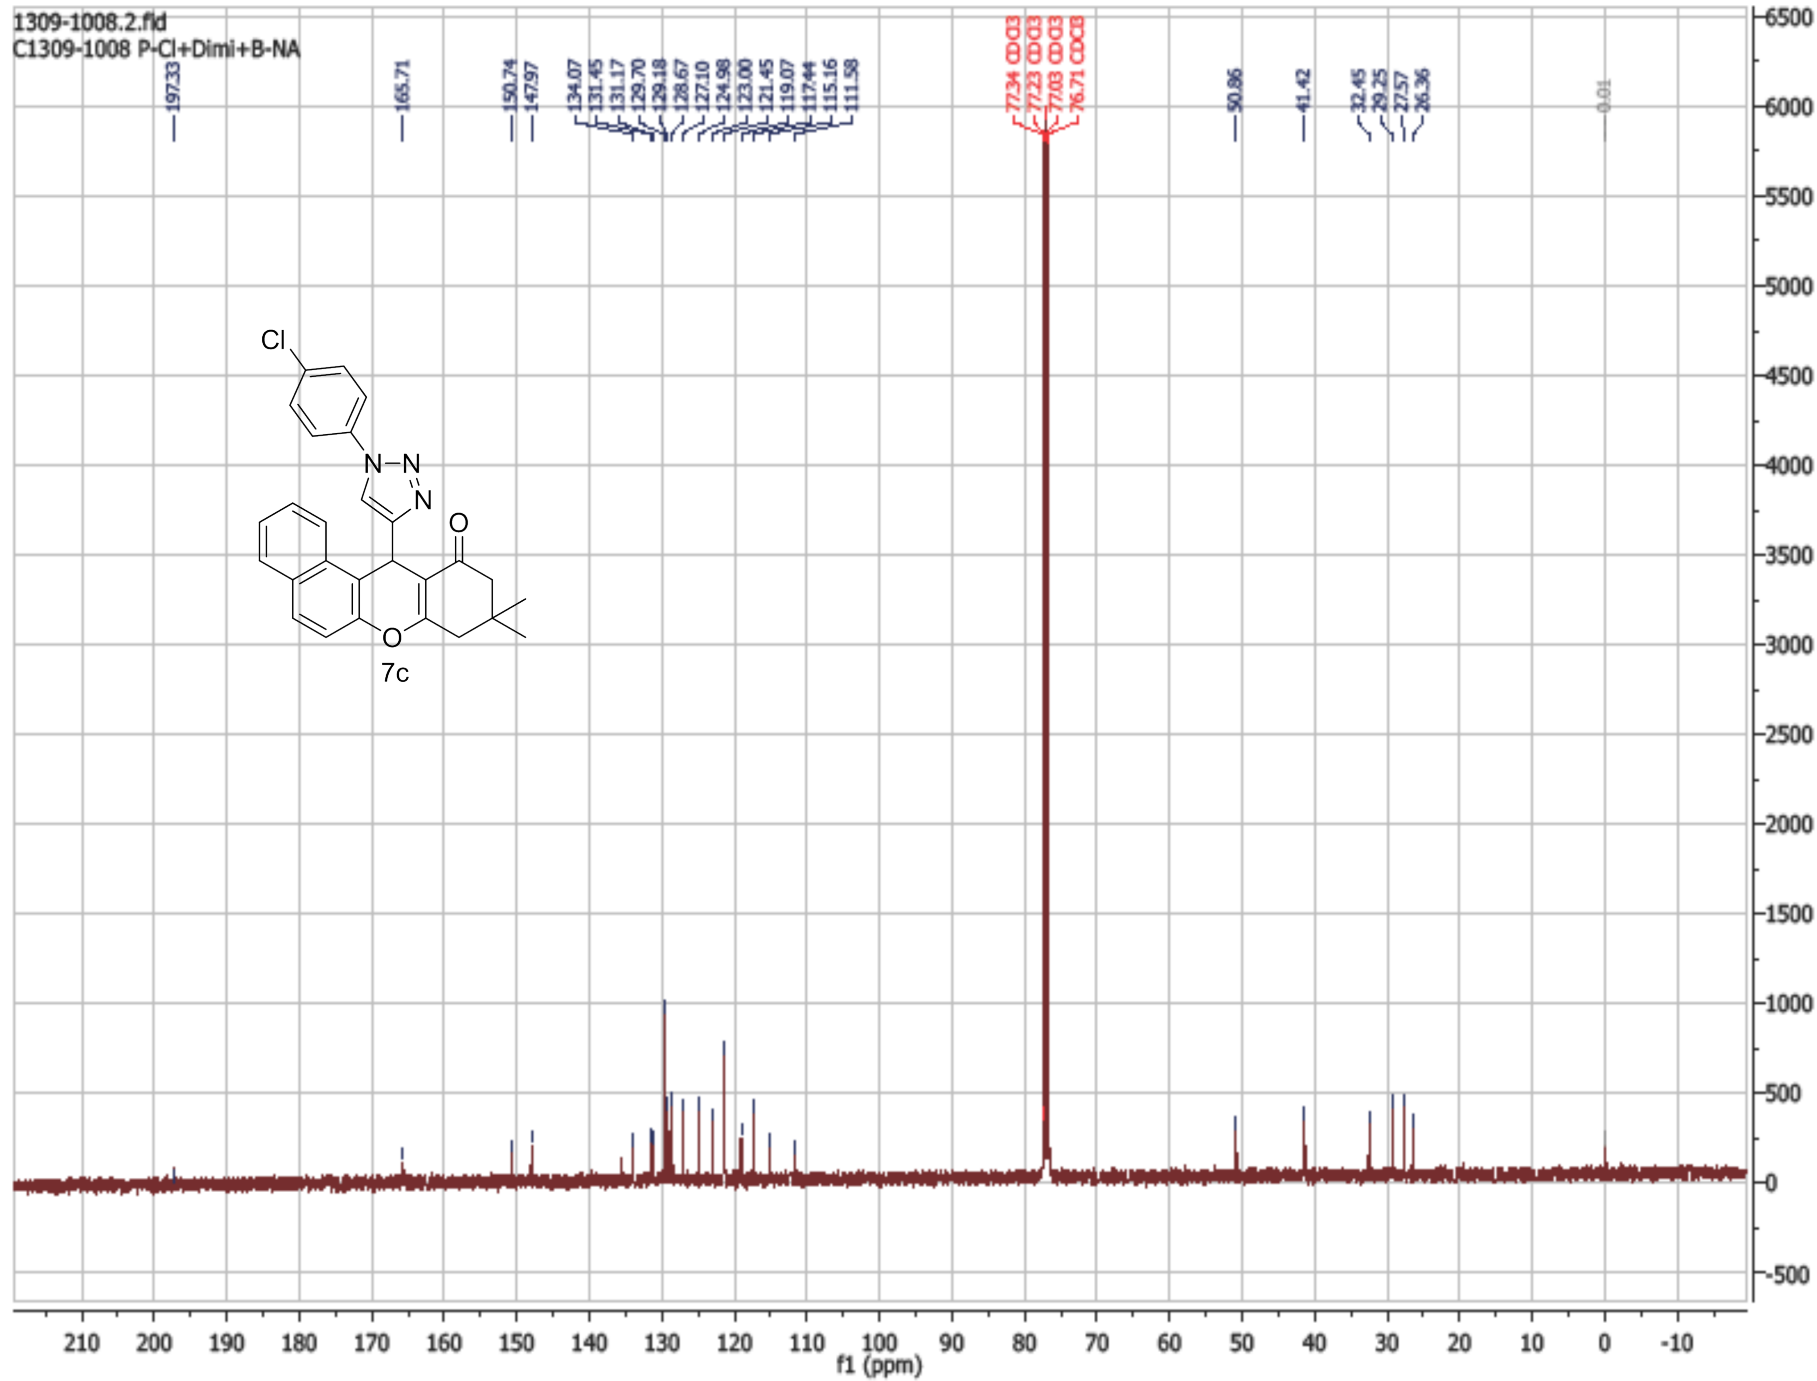

P-cl + Dimi

SHIMADZU

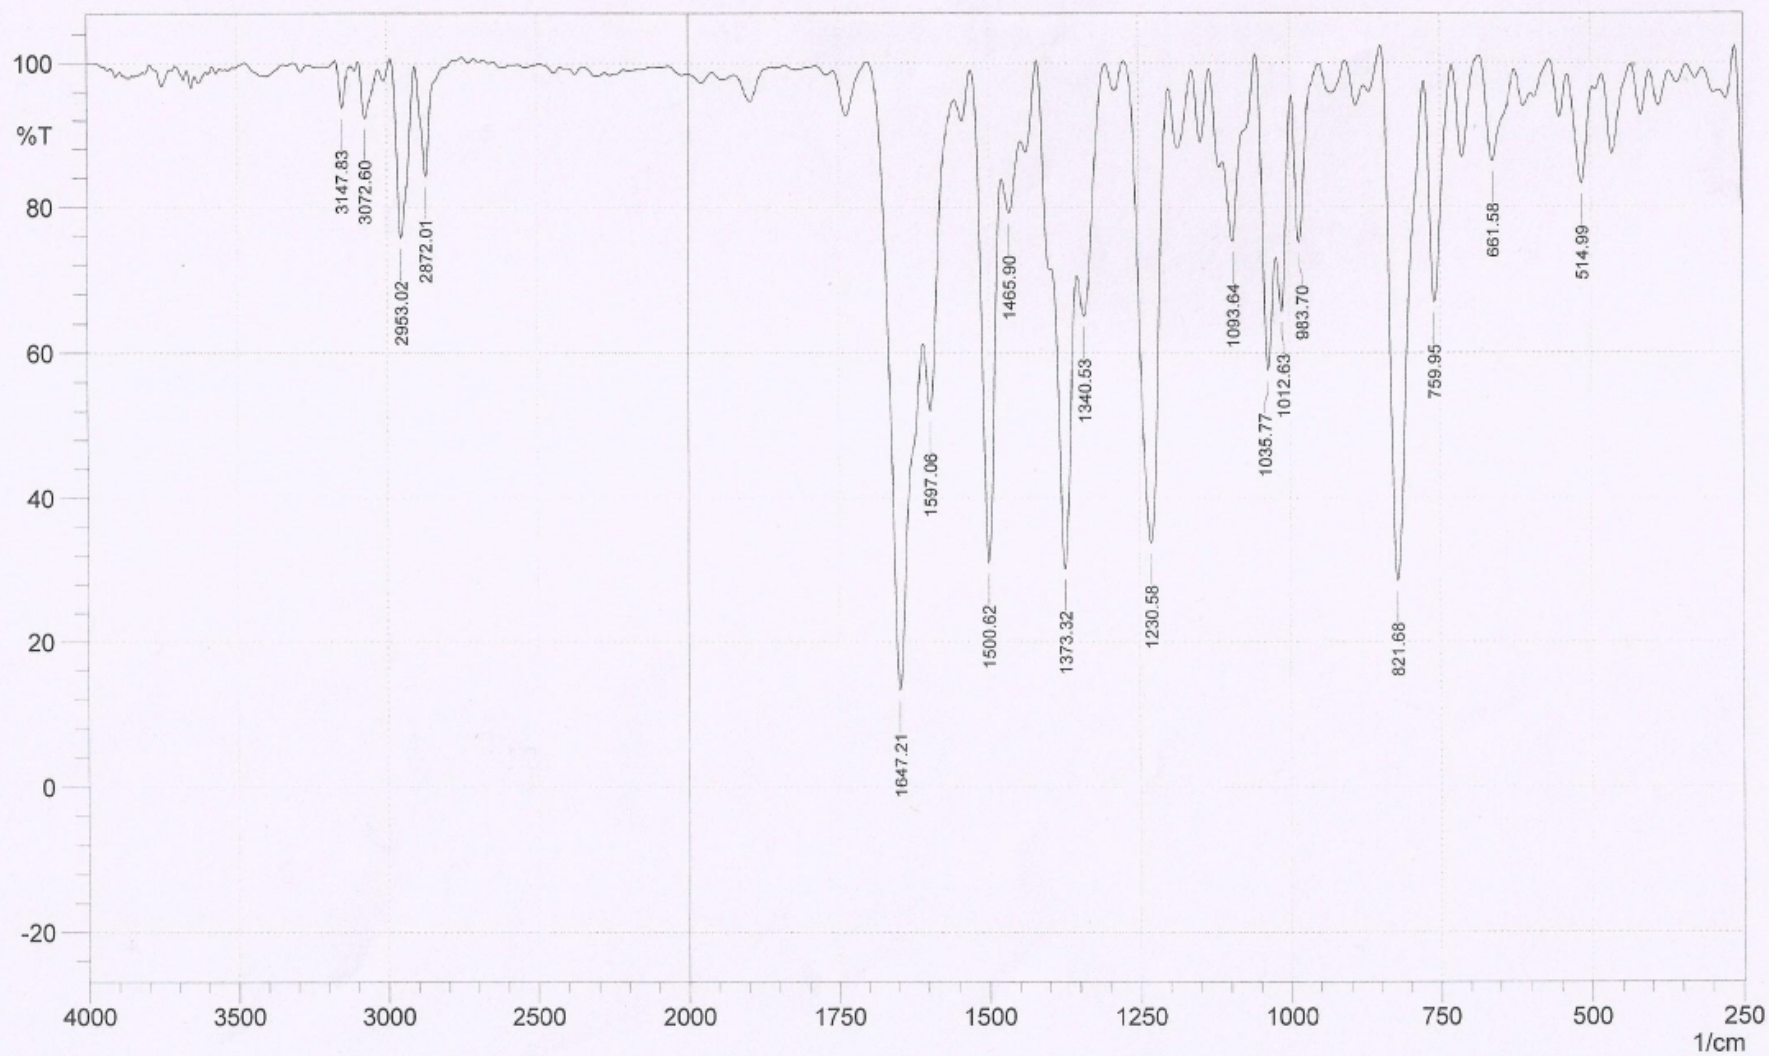

Comment;

No. of Scans;  
Resolution;  
Apodization;

Date/Time; 3/8/2016 2:35:26 PM  
User; user

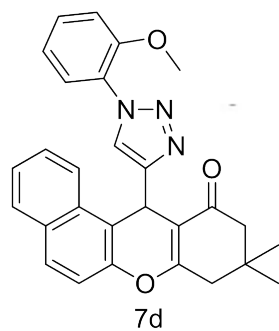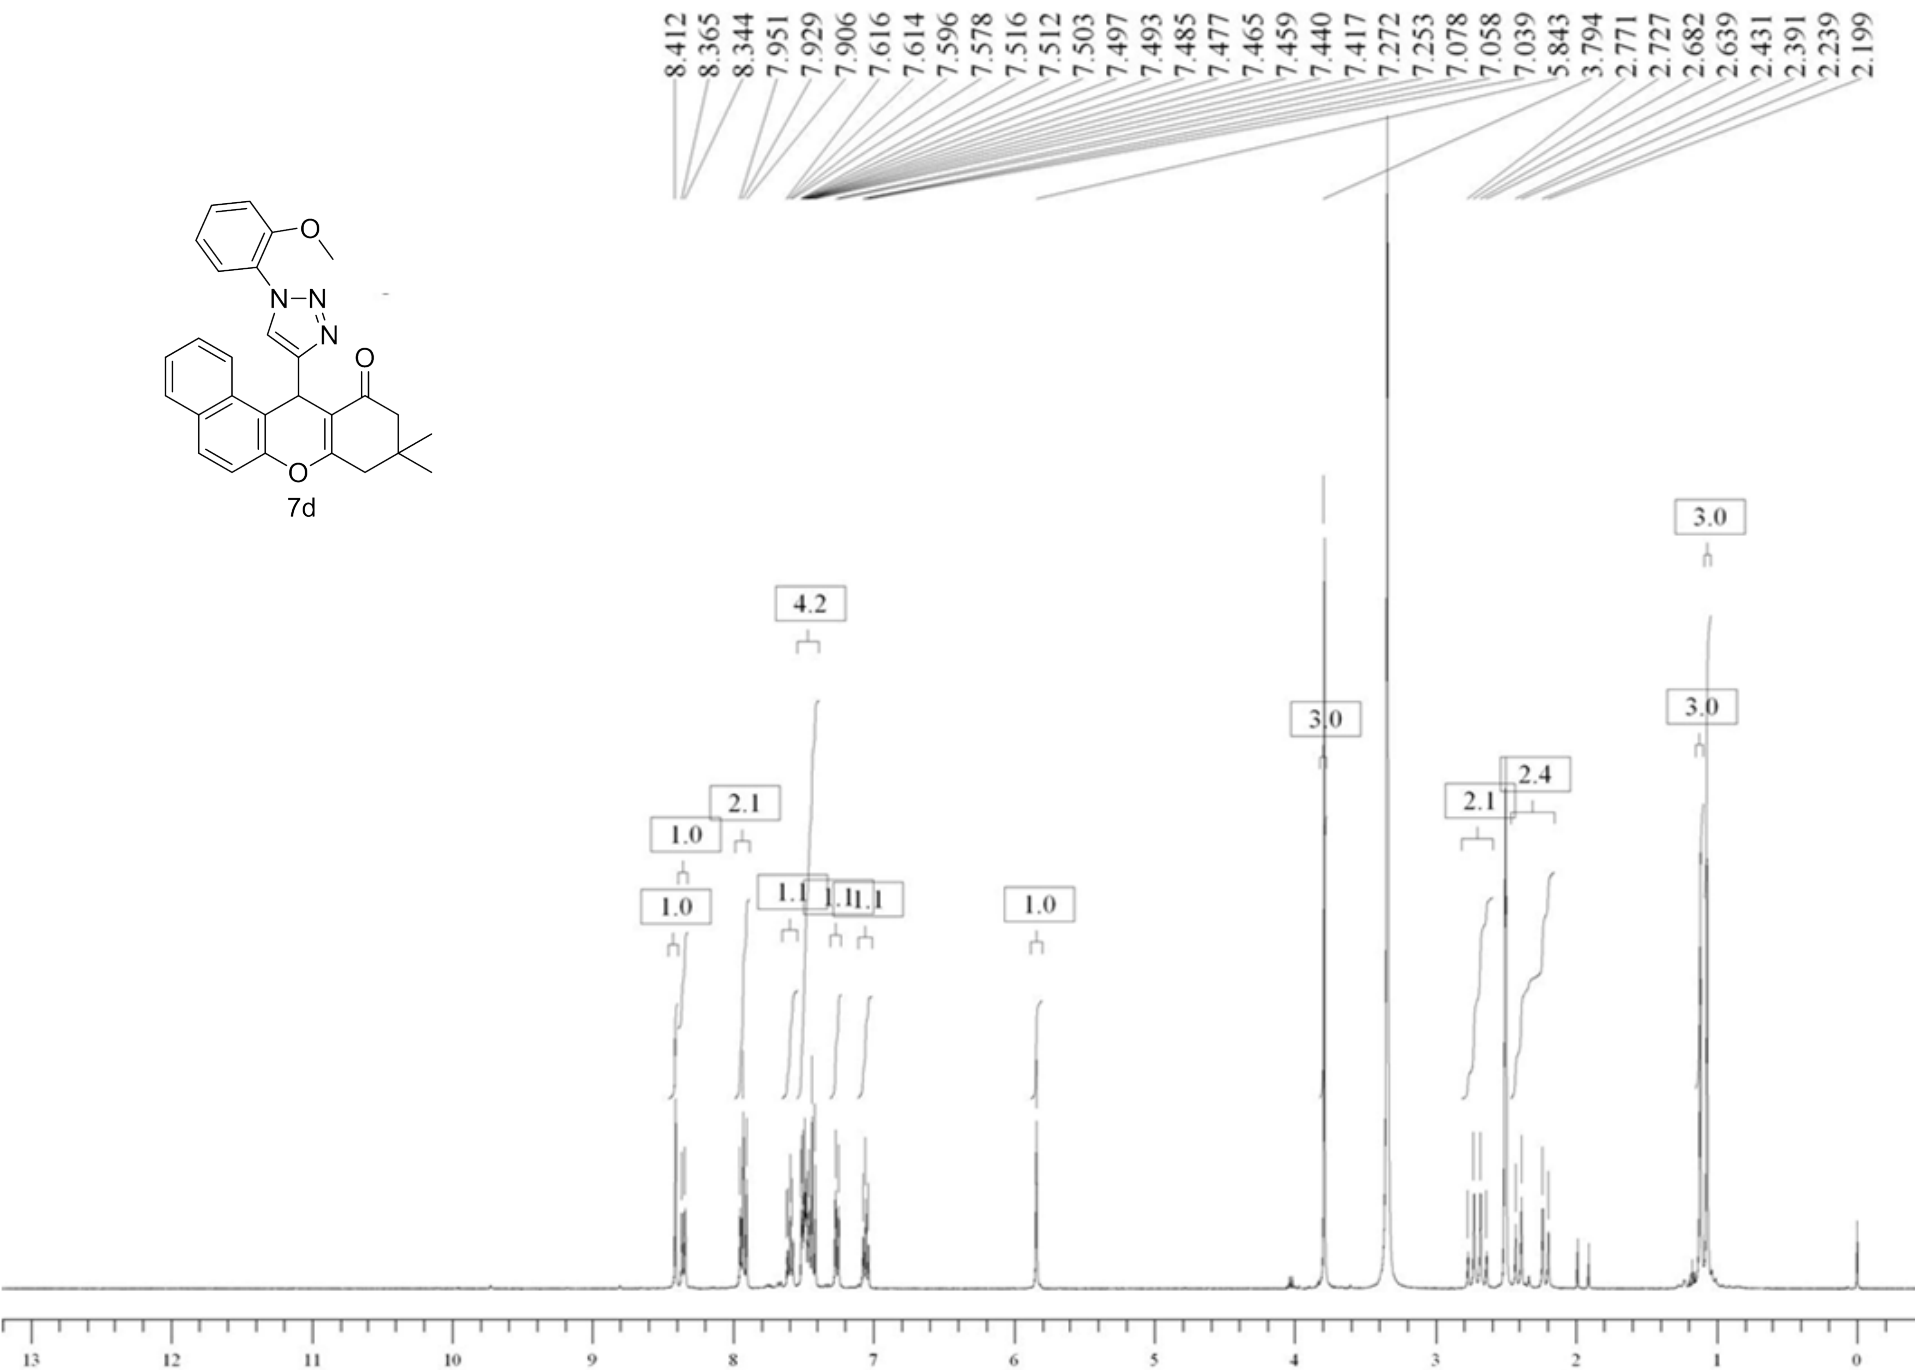



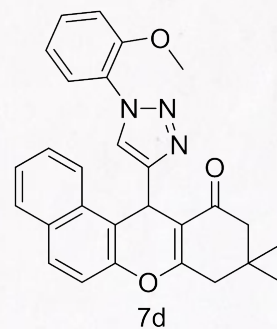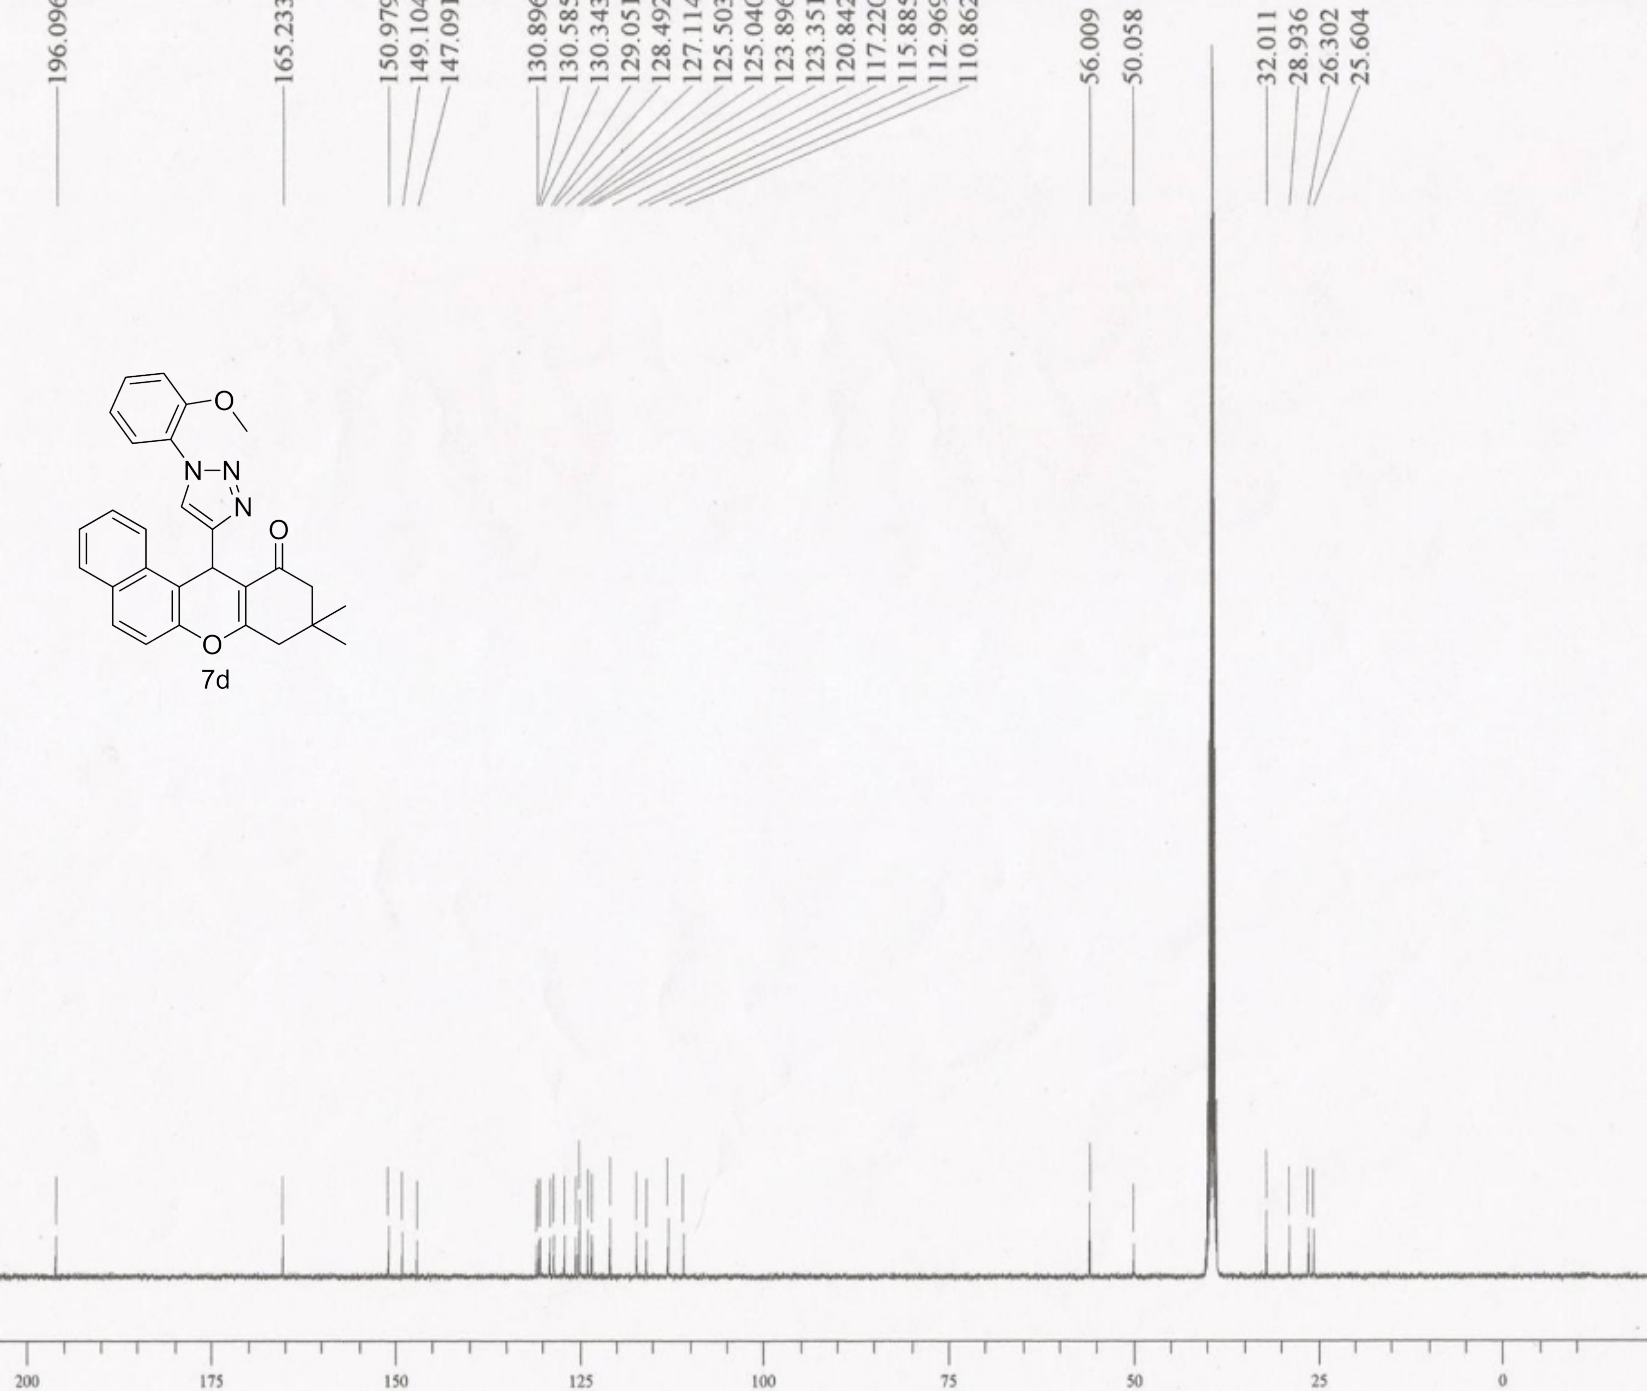



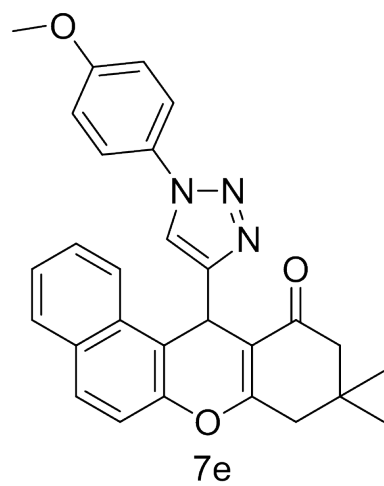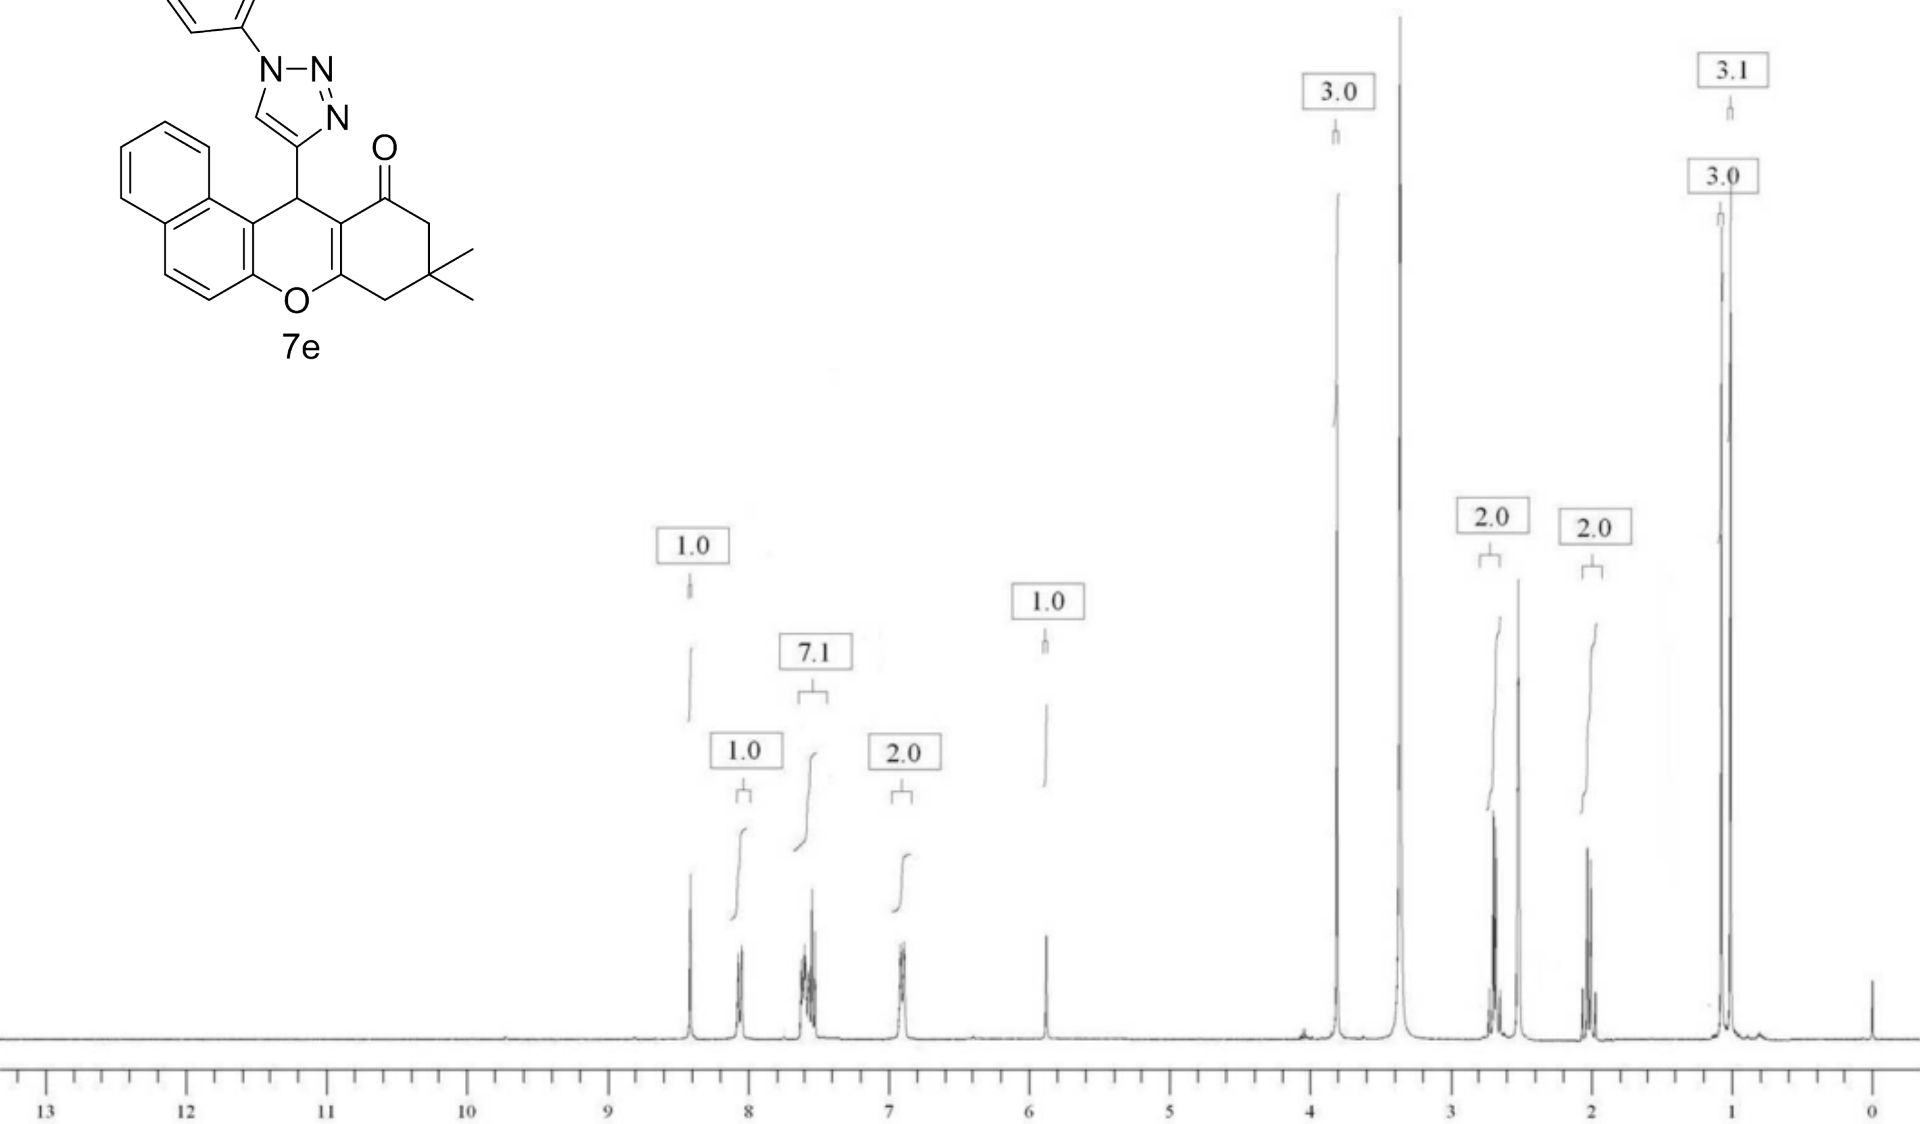

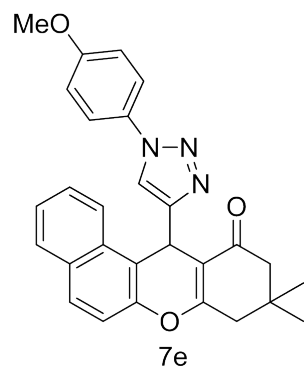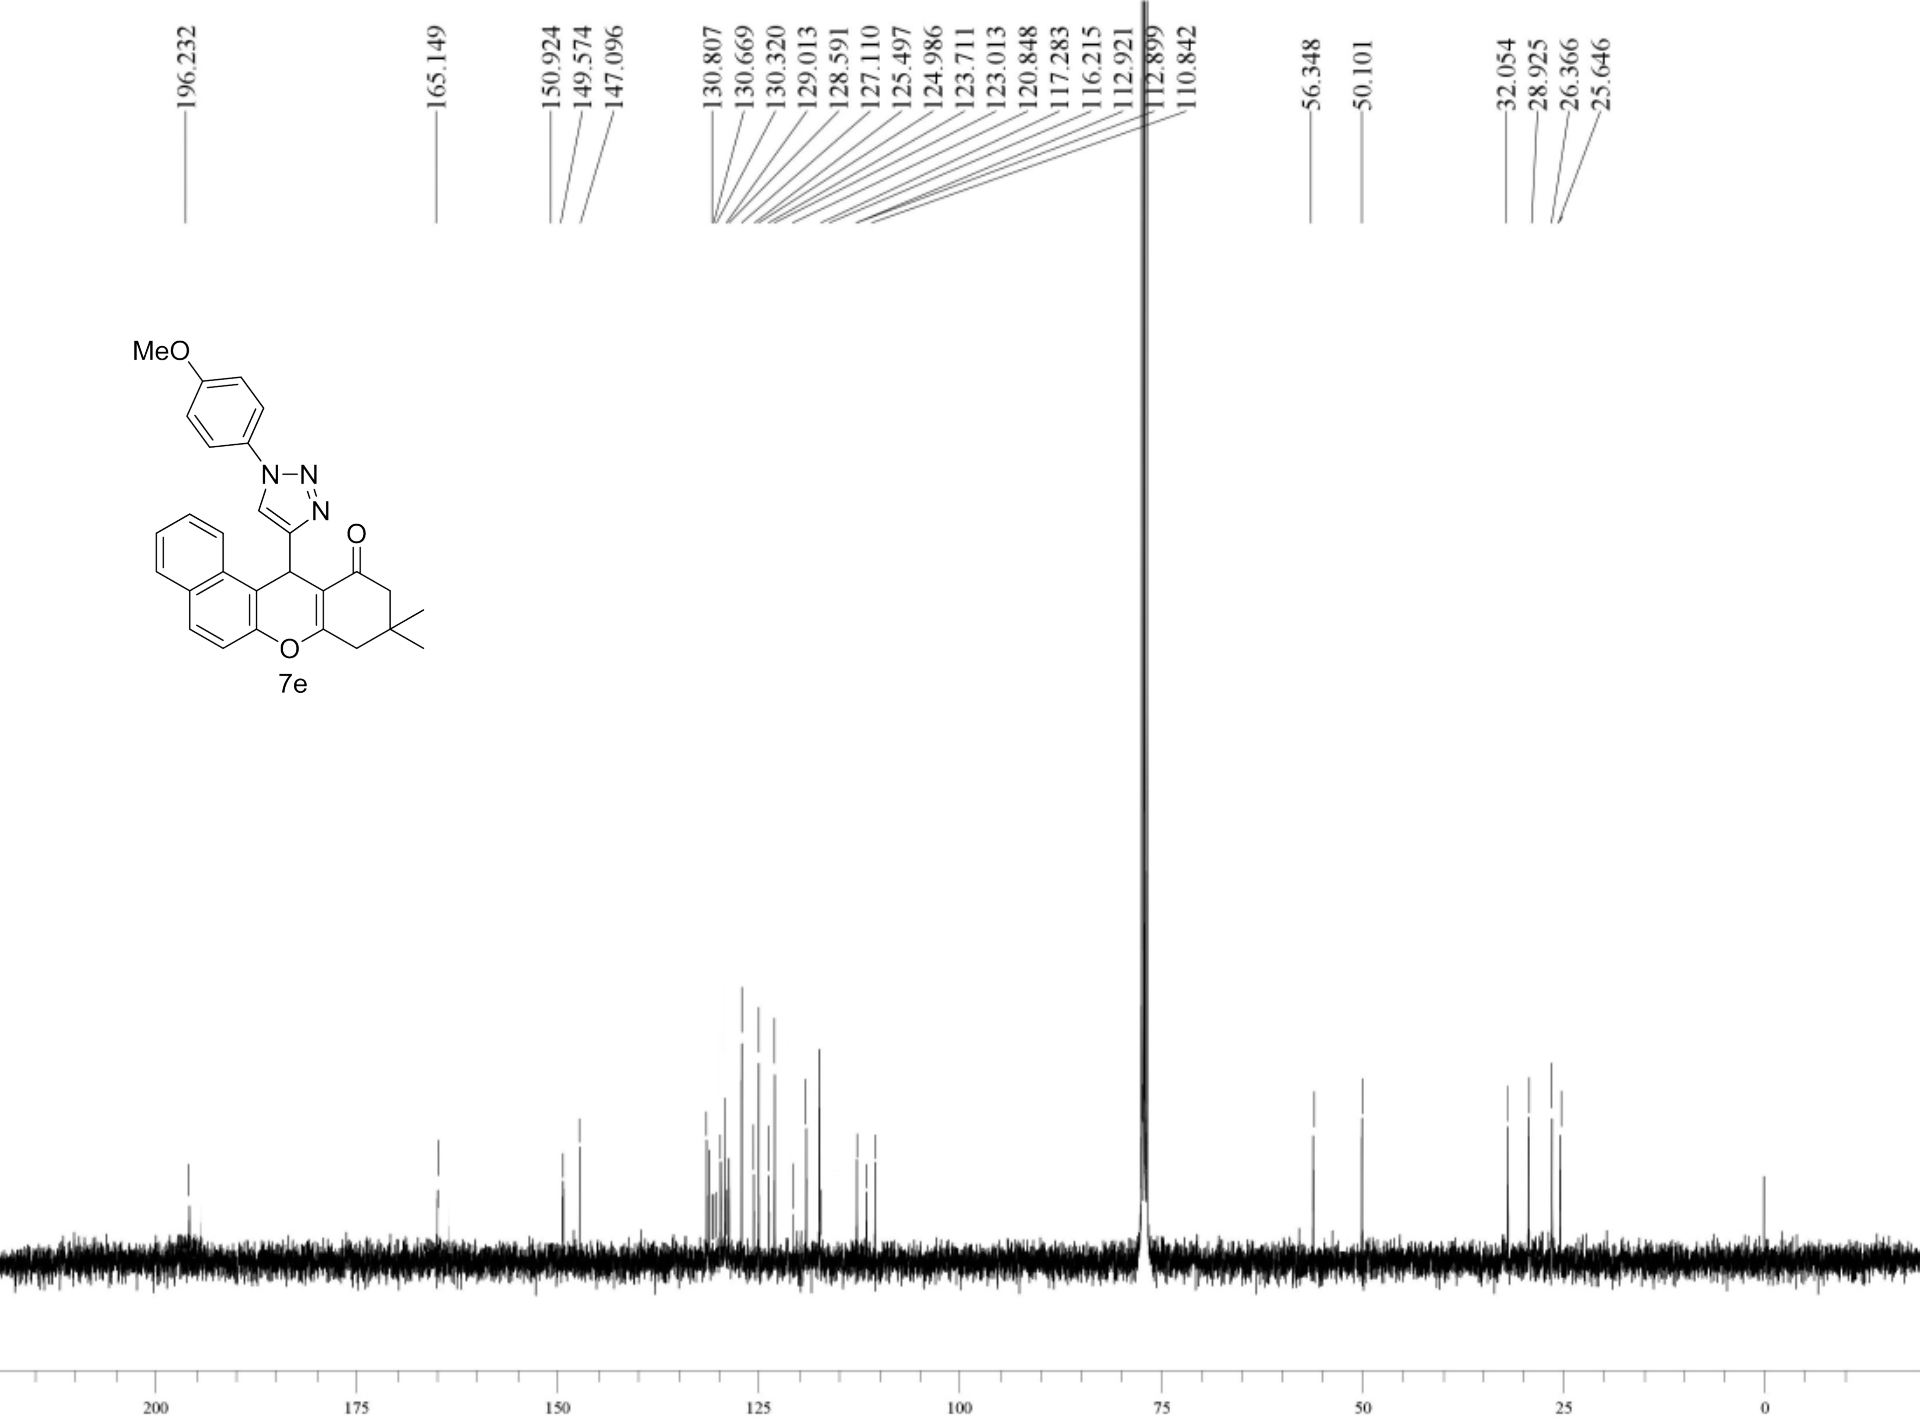

P-ome + Dimi

SHIMADZU

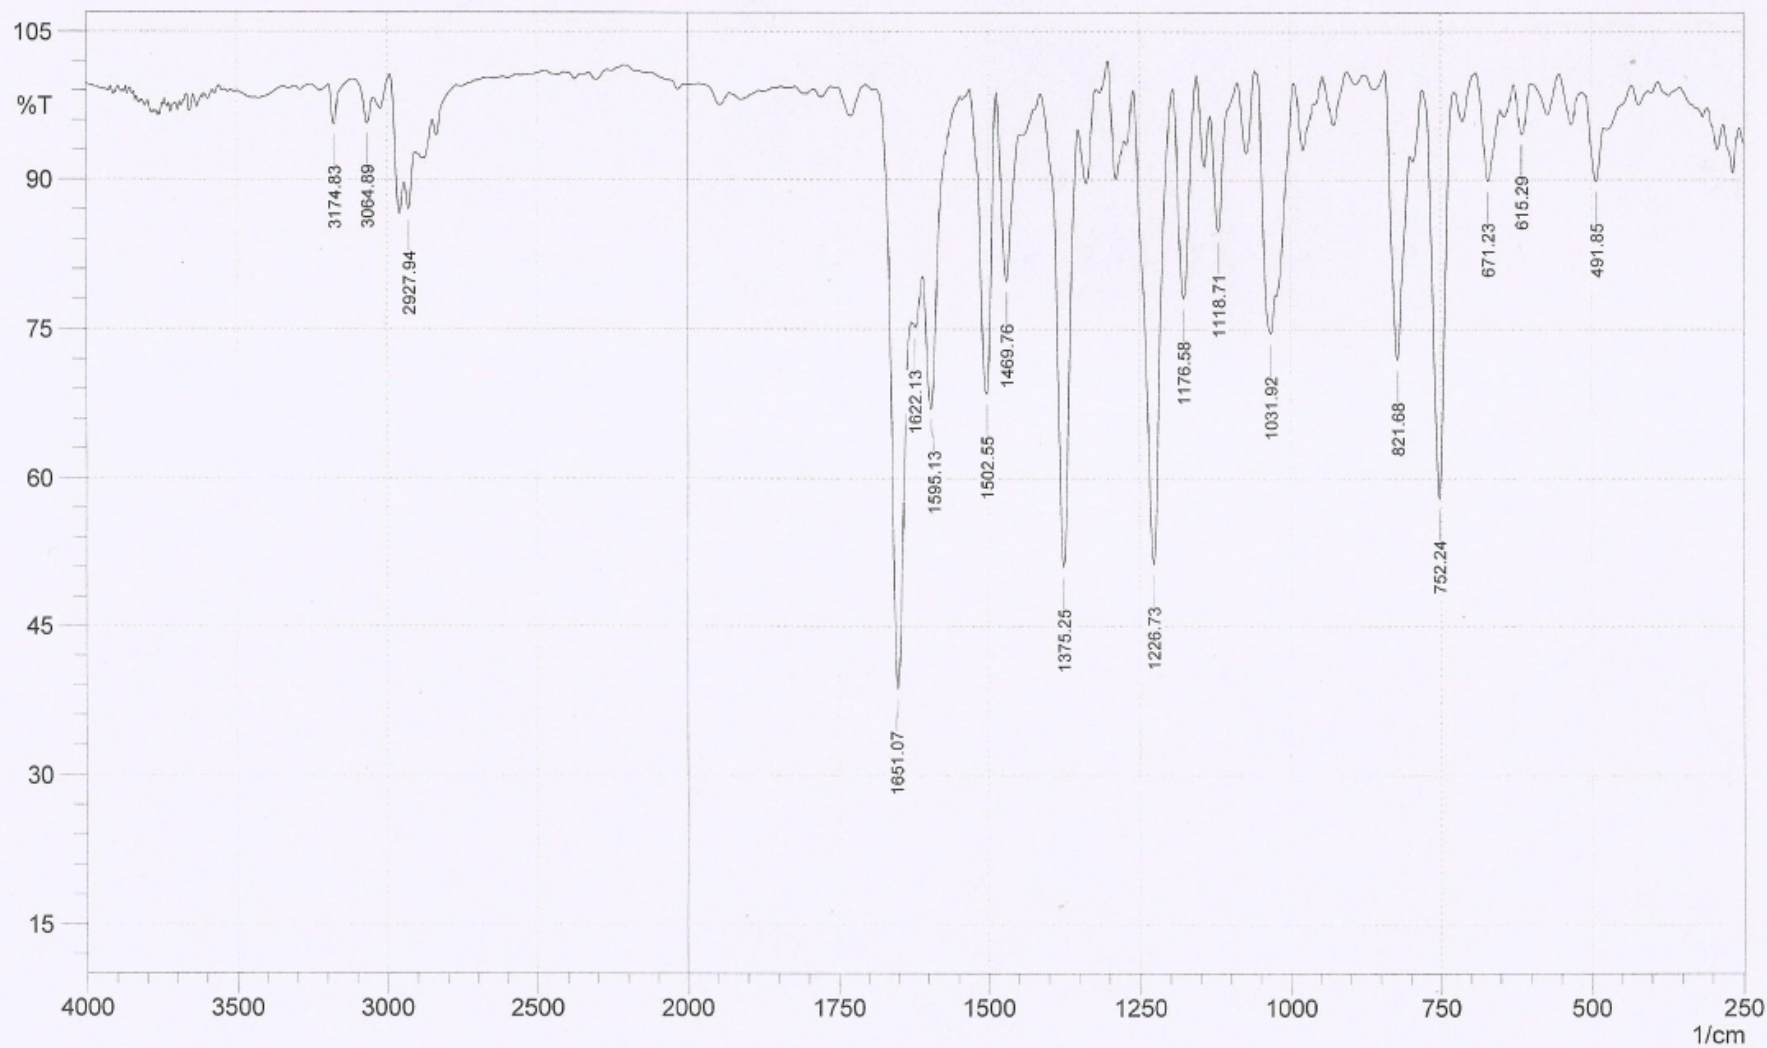

Comment;

No. of Scans;

Resolution;

Apodization;

Date/Time; 3/8/2016 2:52:35 PM

User; user

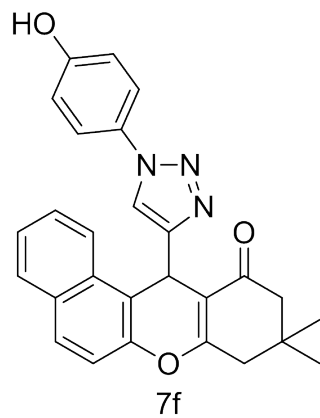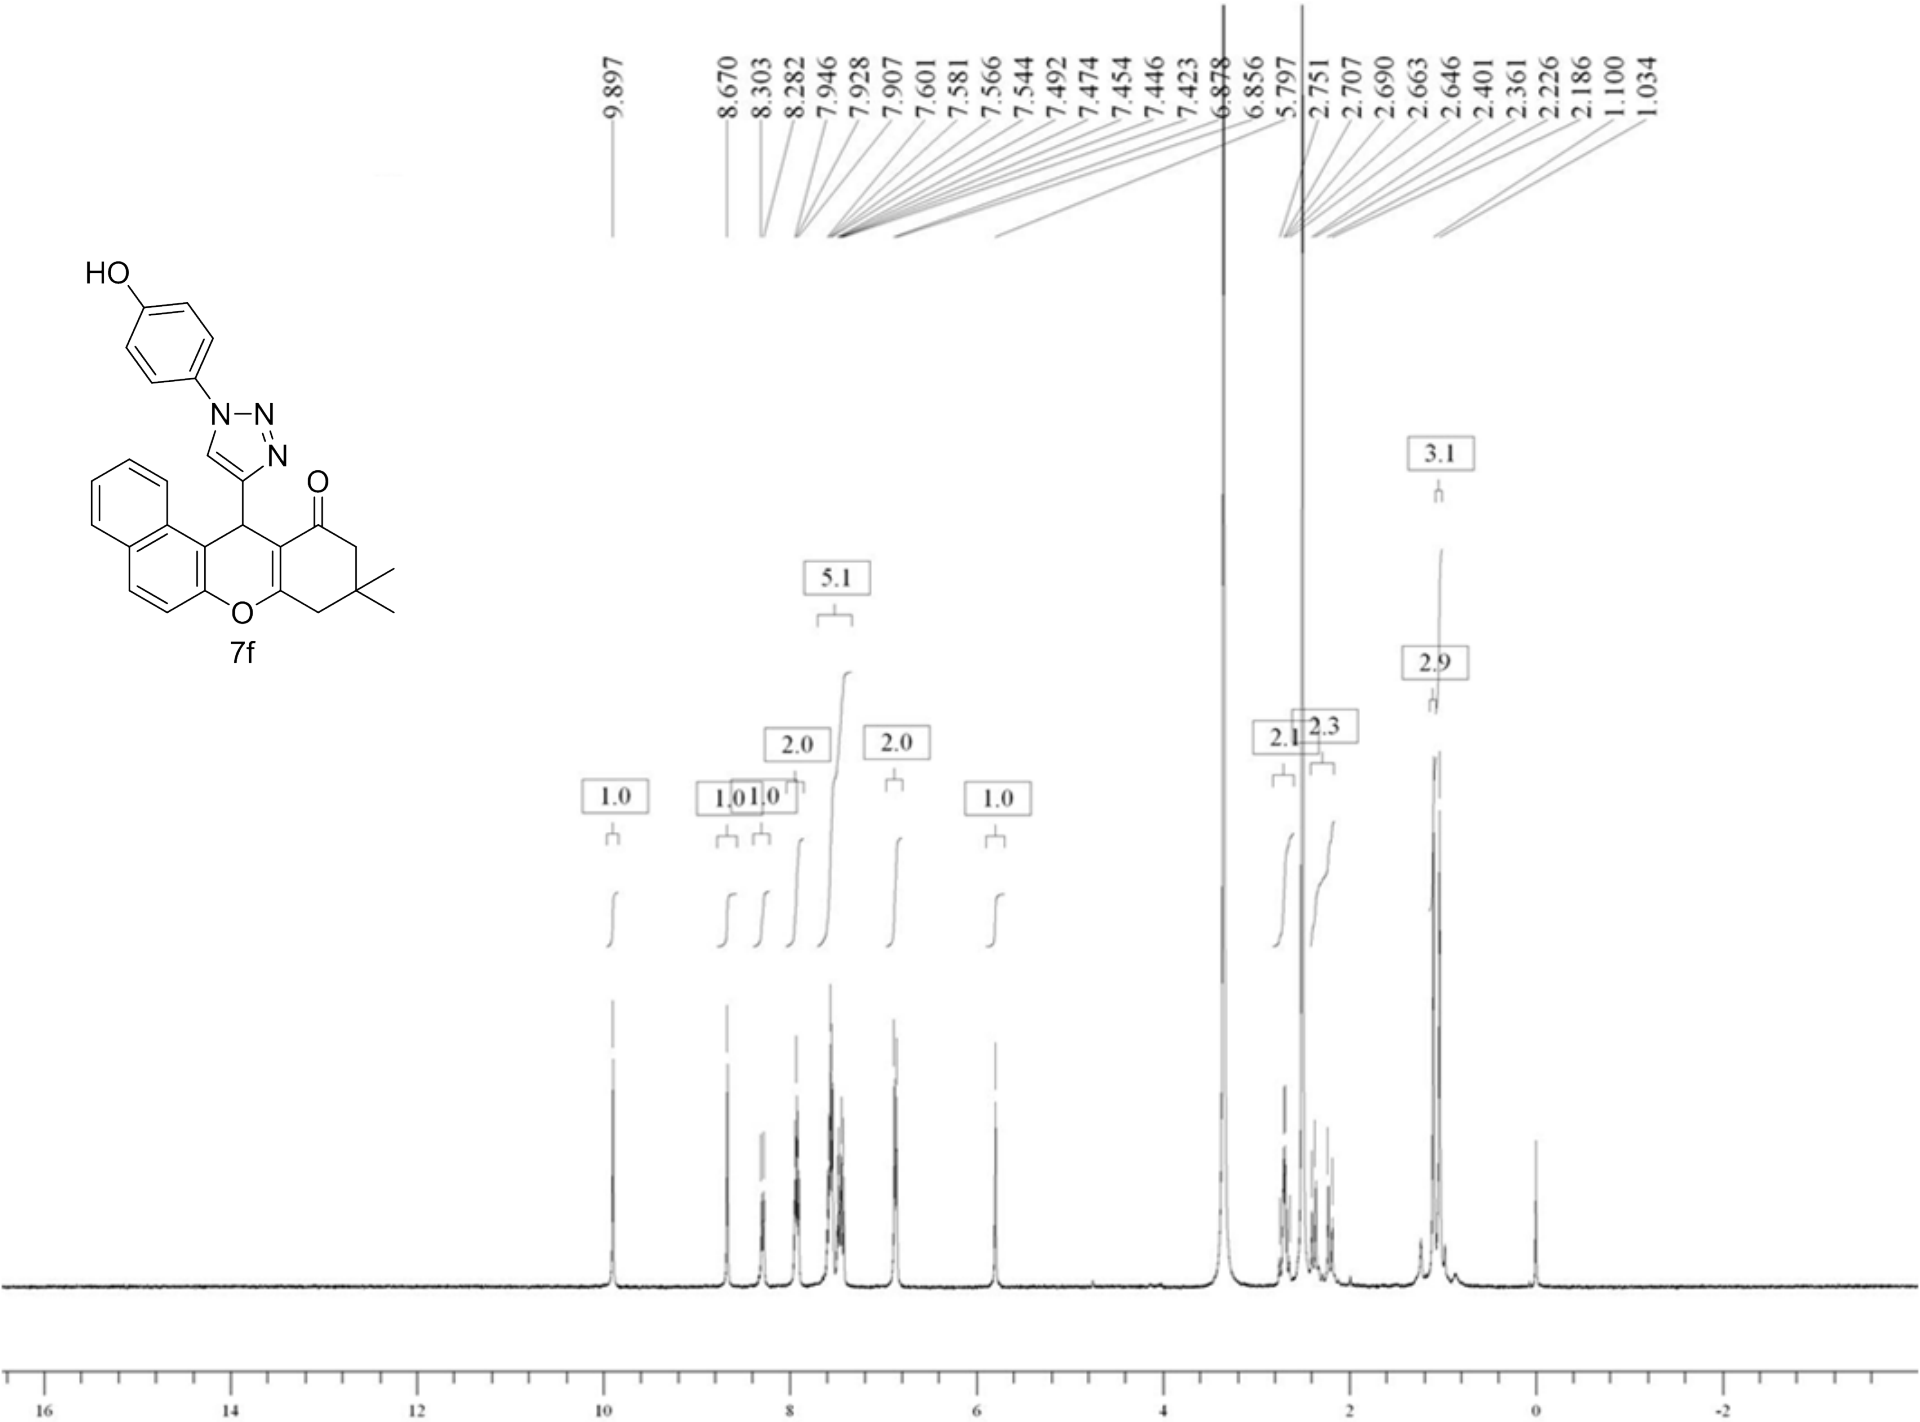

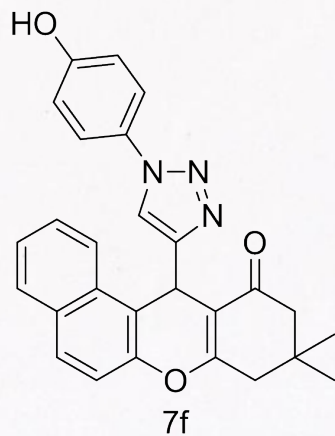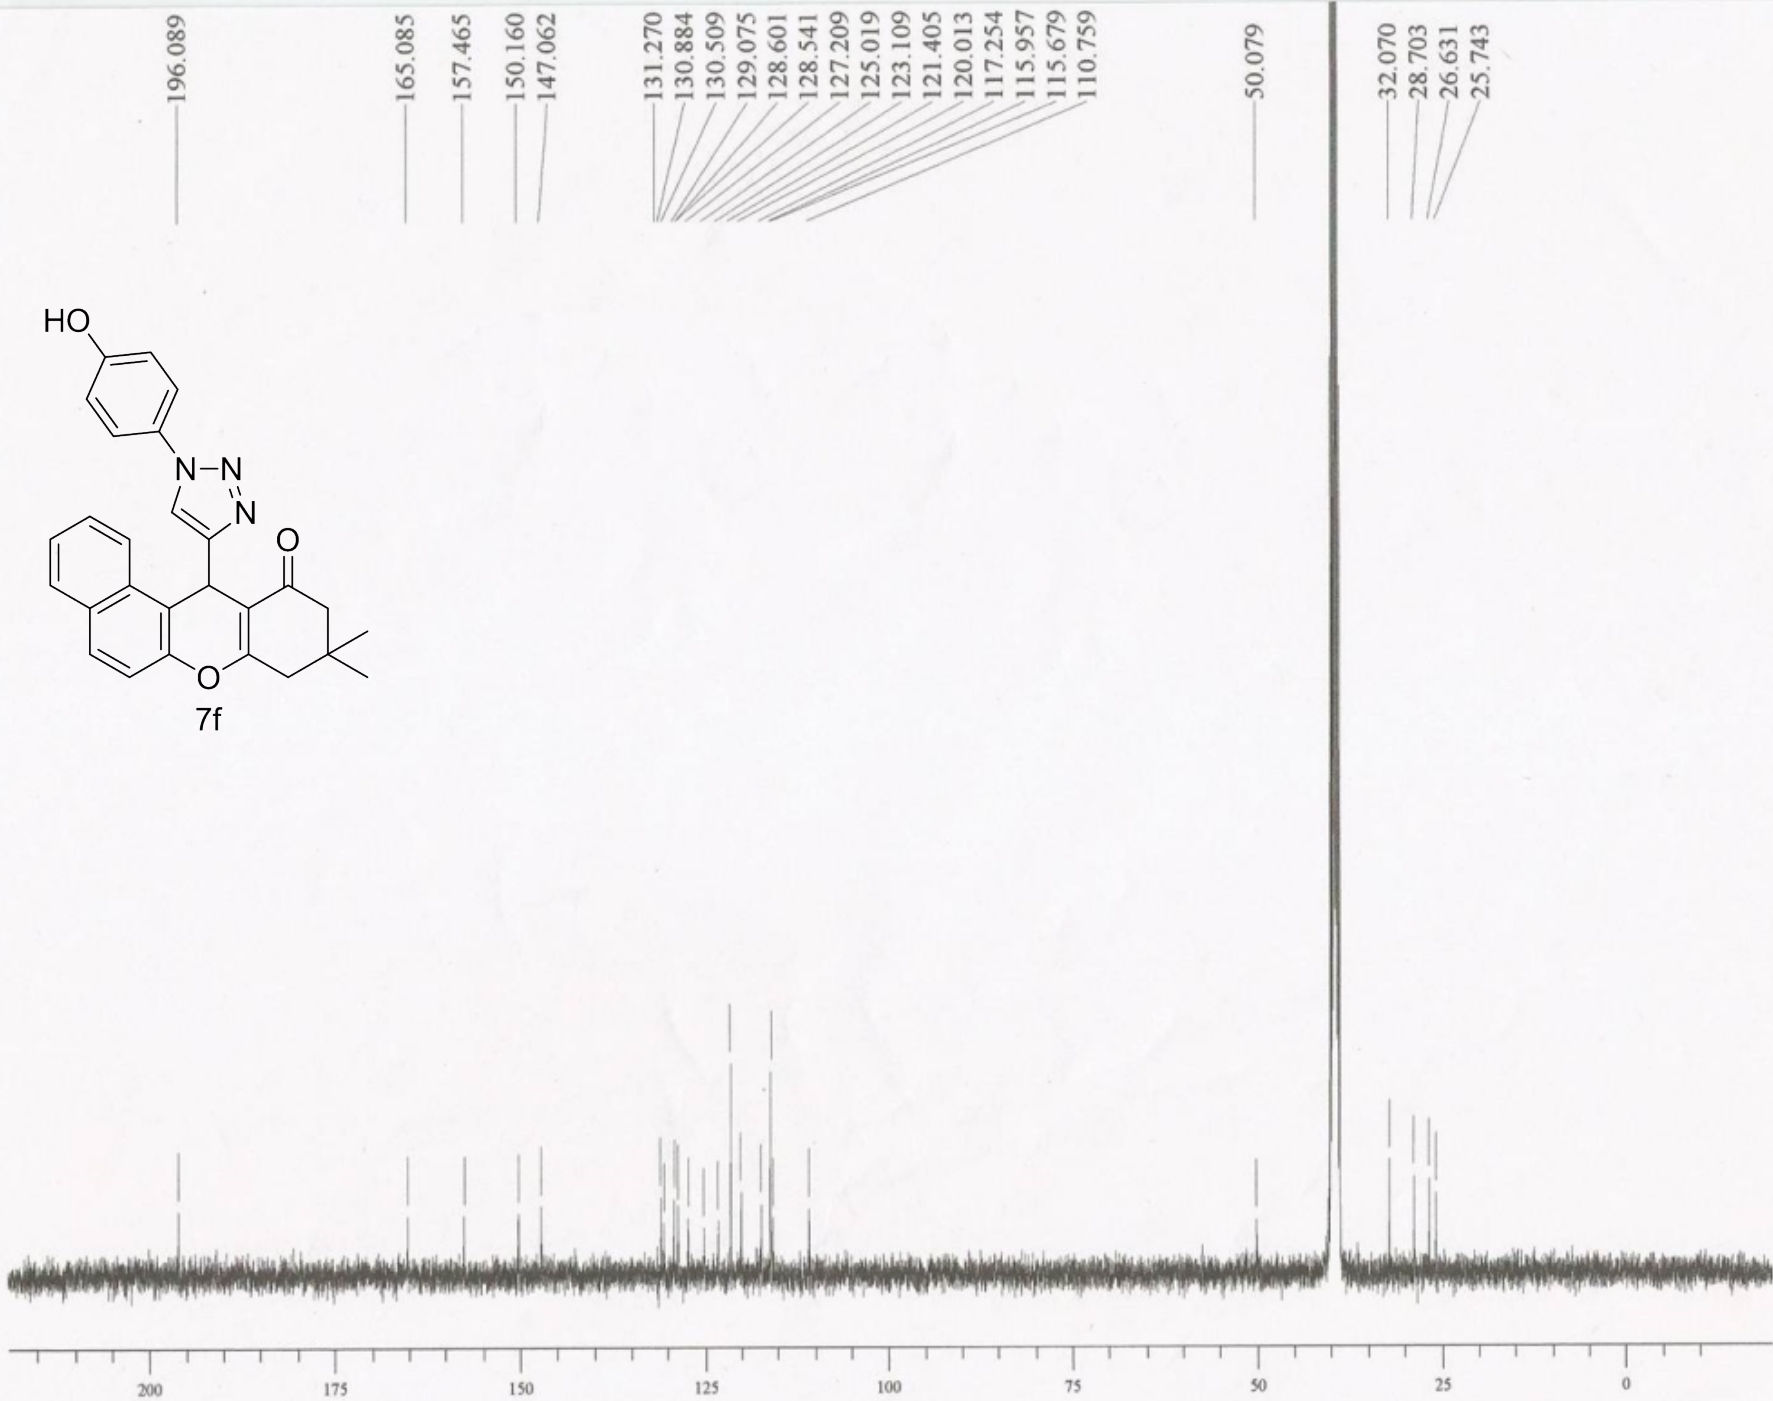

**Chemical Structure:**

O=C1CCCCC1c2cc(O)c3ccccc3c2N=Nc4ccccc4

**Peak Data:**

| Chemical Shift (ppm) | Integration |
|----------------------|-------------|
| ~8.03                | 2.07        |
| ~7.83                | 2.08        |
| ~7.81                | 2.23        |
| ~7.78                | 6.18        |
| ~6.00                | 1.00        |
| ~2.84                | 2.34        |
| ~2.78                | 2.37        |
| ~2.12                | 2.36        |

**Solvent Peaks:**

- CDCl<sub>3</sub>: ~2.26 ppm
- H<sub>2</sub>O: ~1.60 ppm

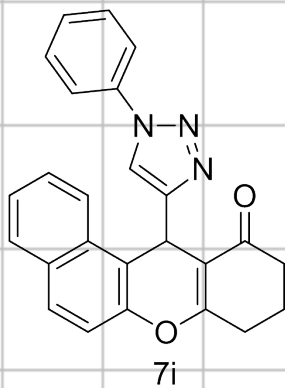

7i

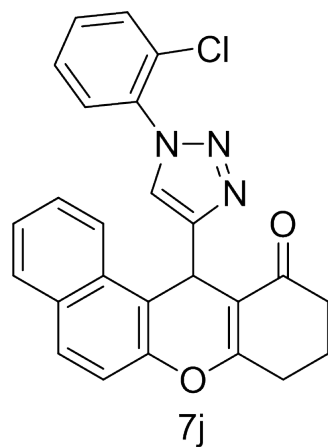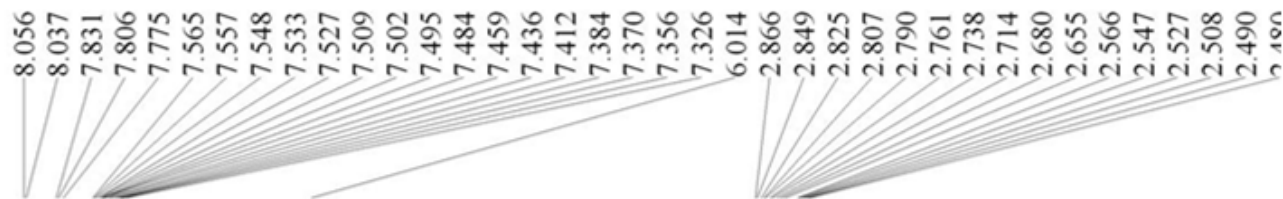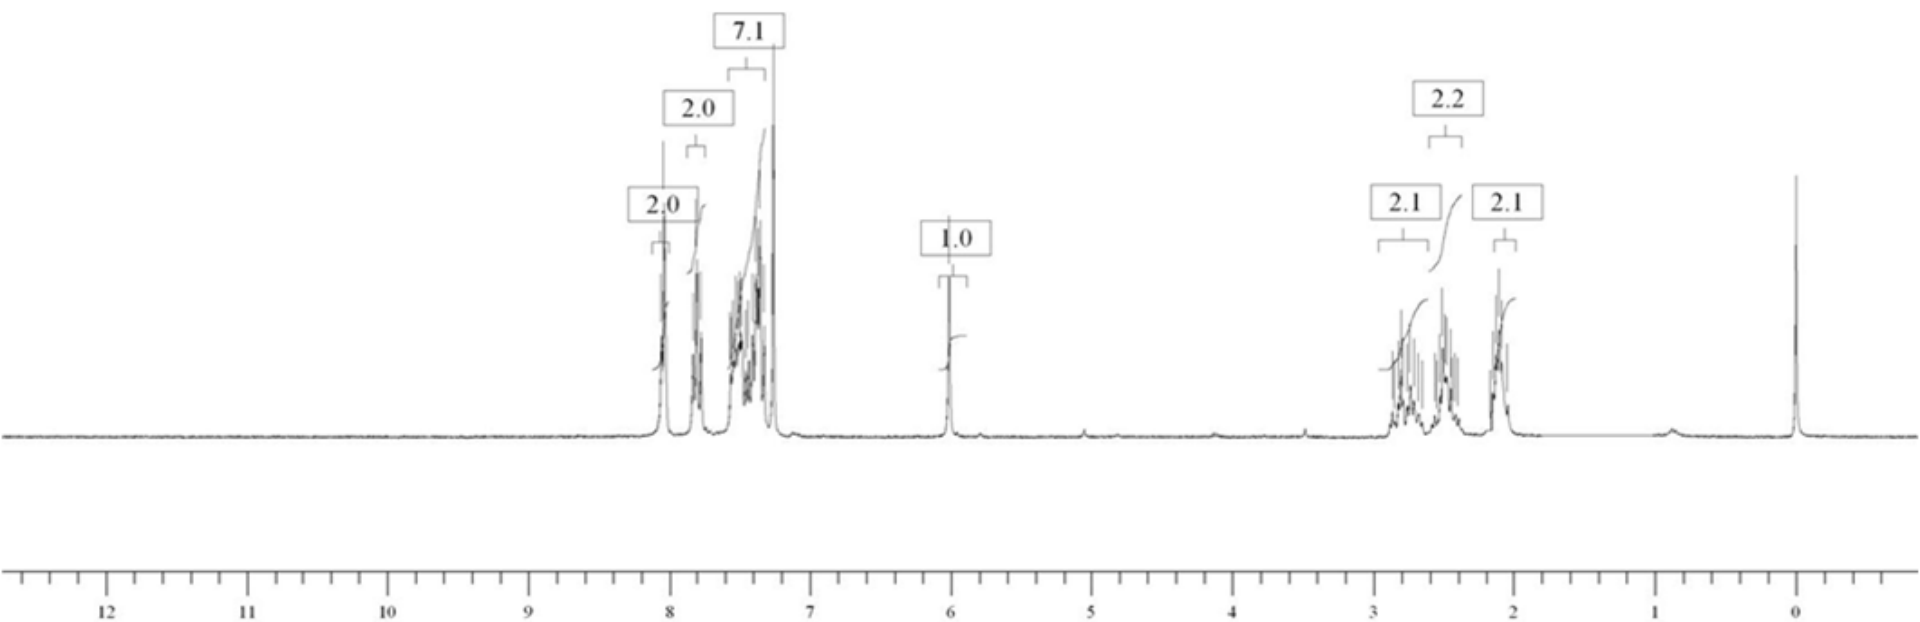

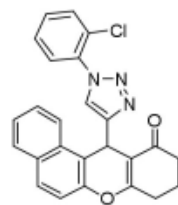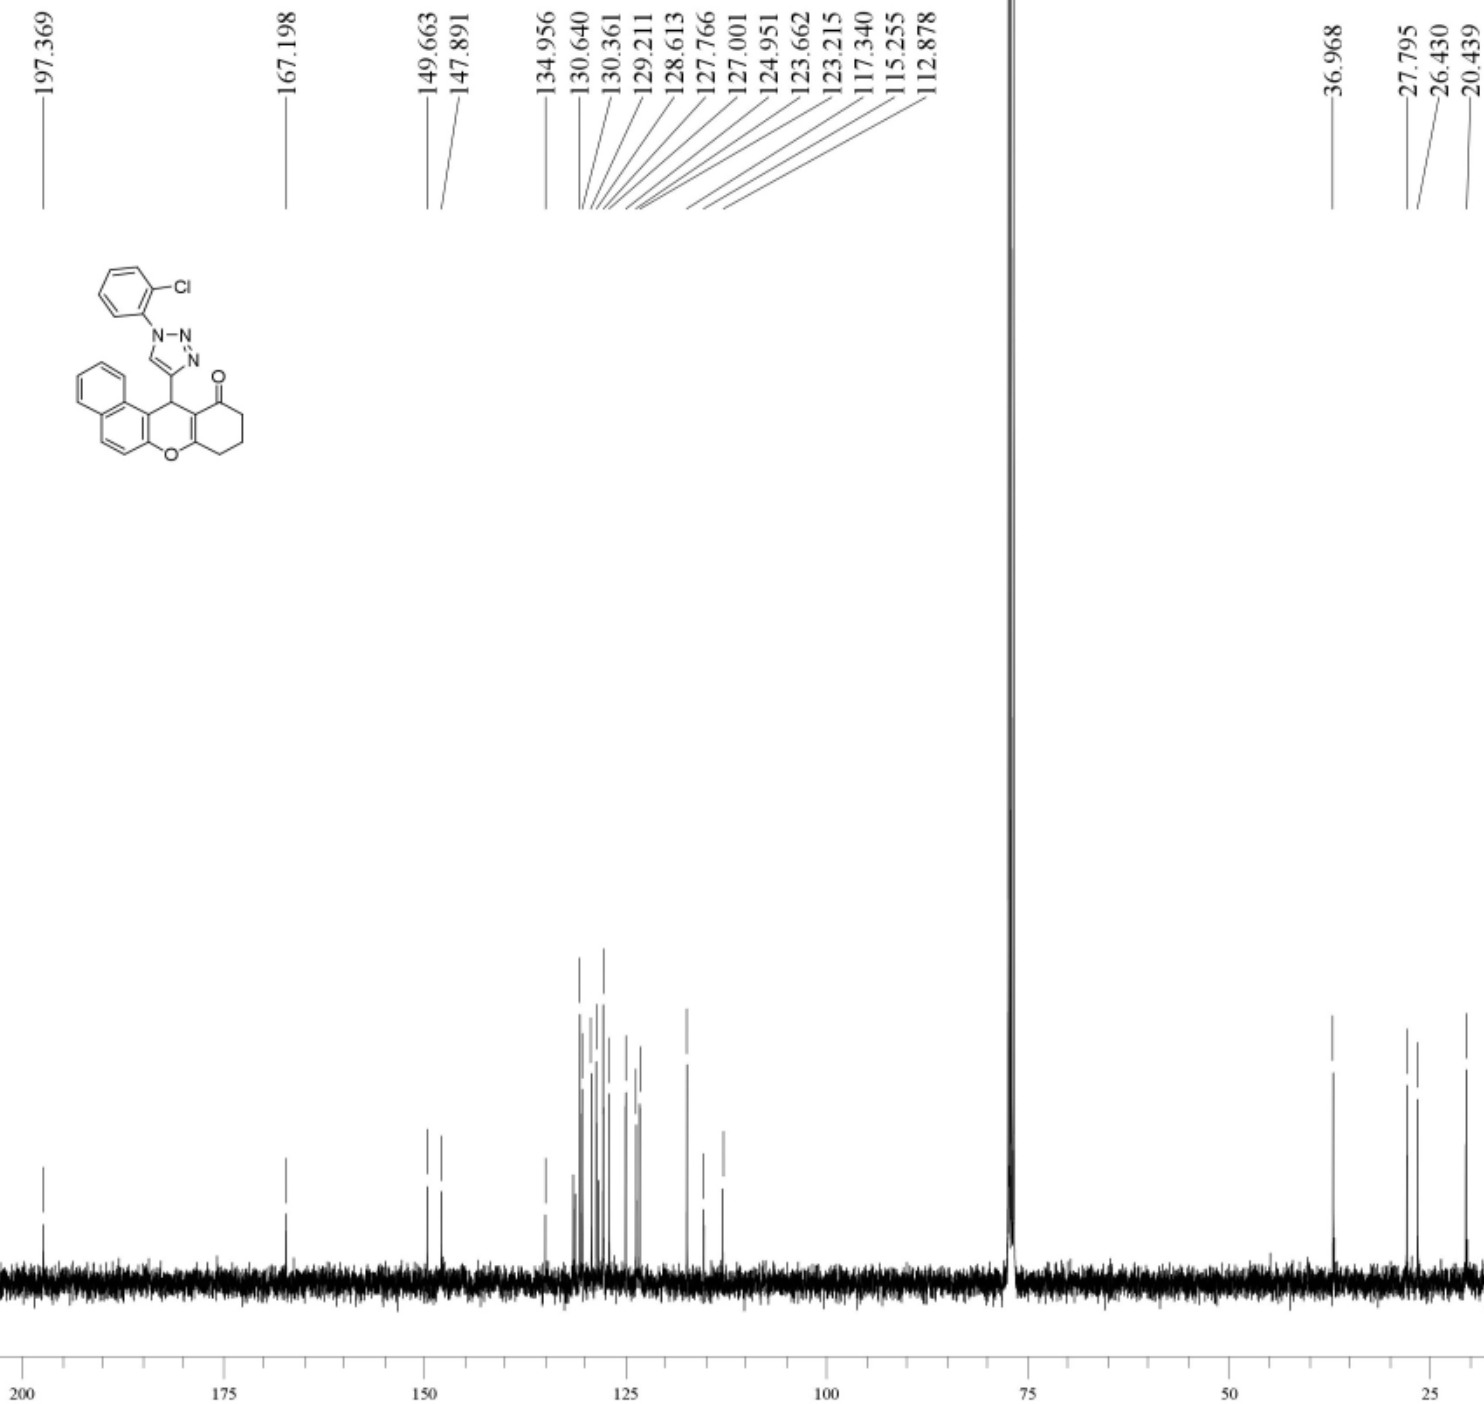



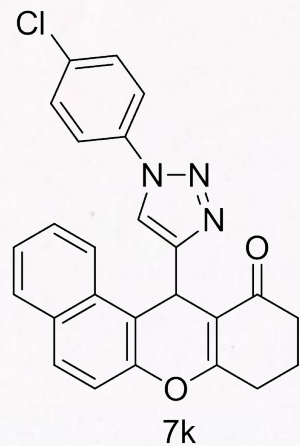

8.014  
7.992  
7.975  
7.830  
7.805  
7.782  
7.621  
7.615  
7.604  
7.599  
7.481  
7.477  
7.439  
7.431  
7.425  
7.414  
7.409  
7.356  
7.334  
7.262  
5.989

5.0

2.02020

1.0

1.8

1.9

1.8

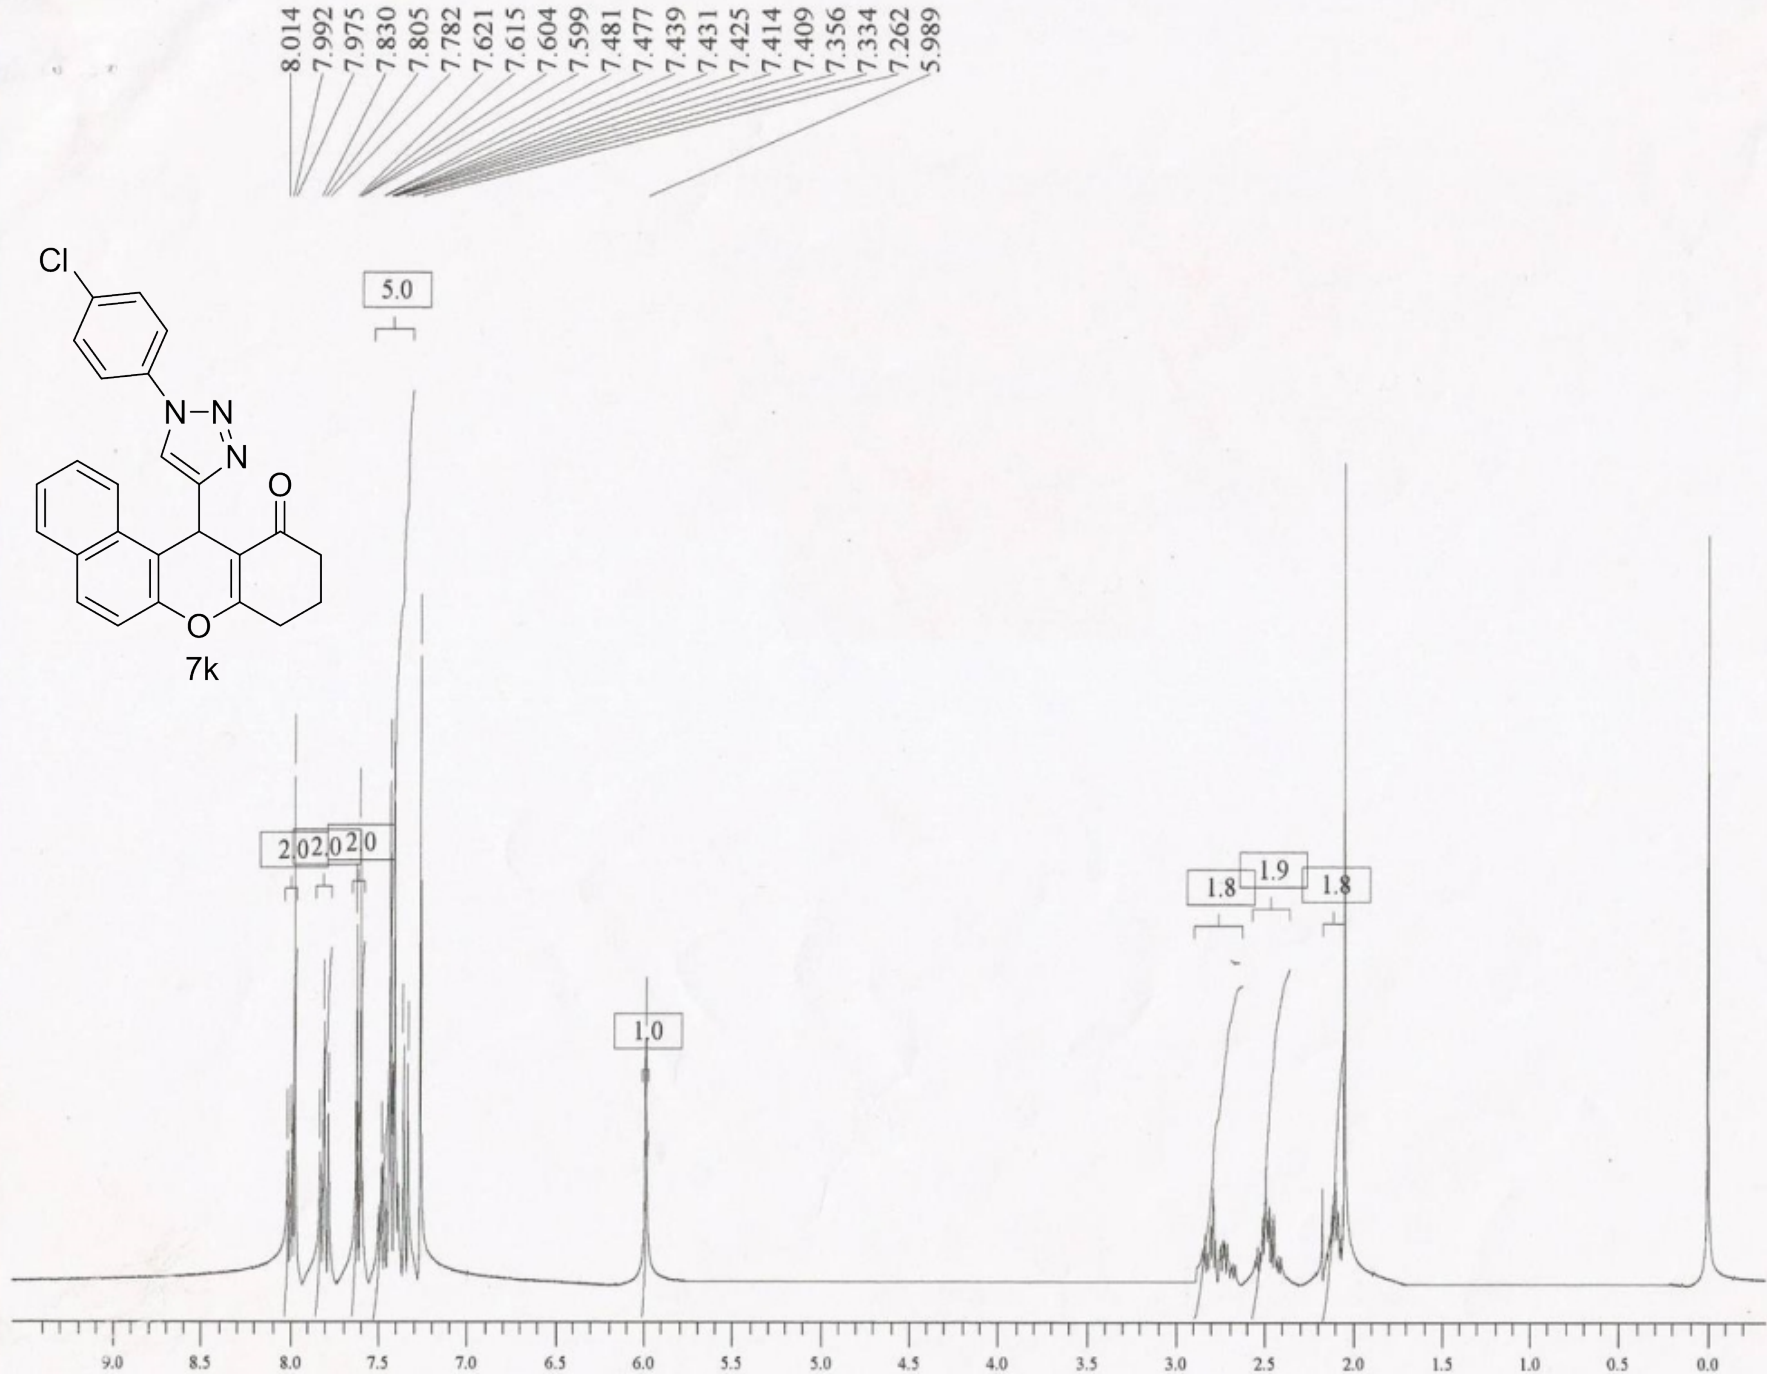

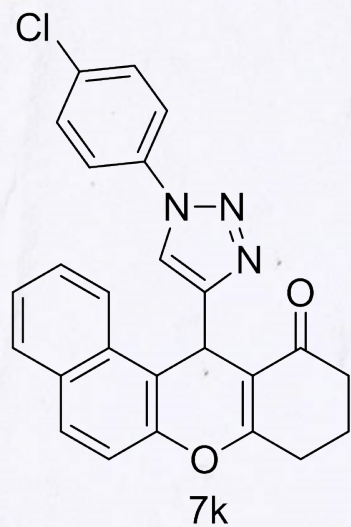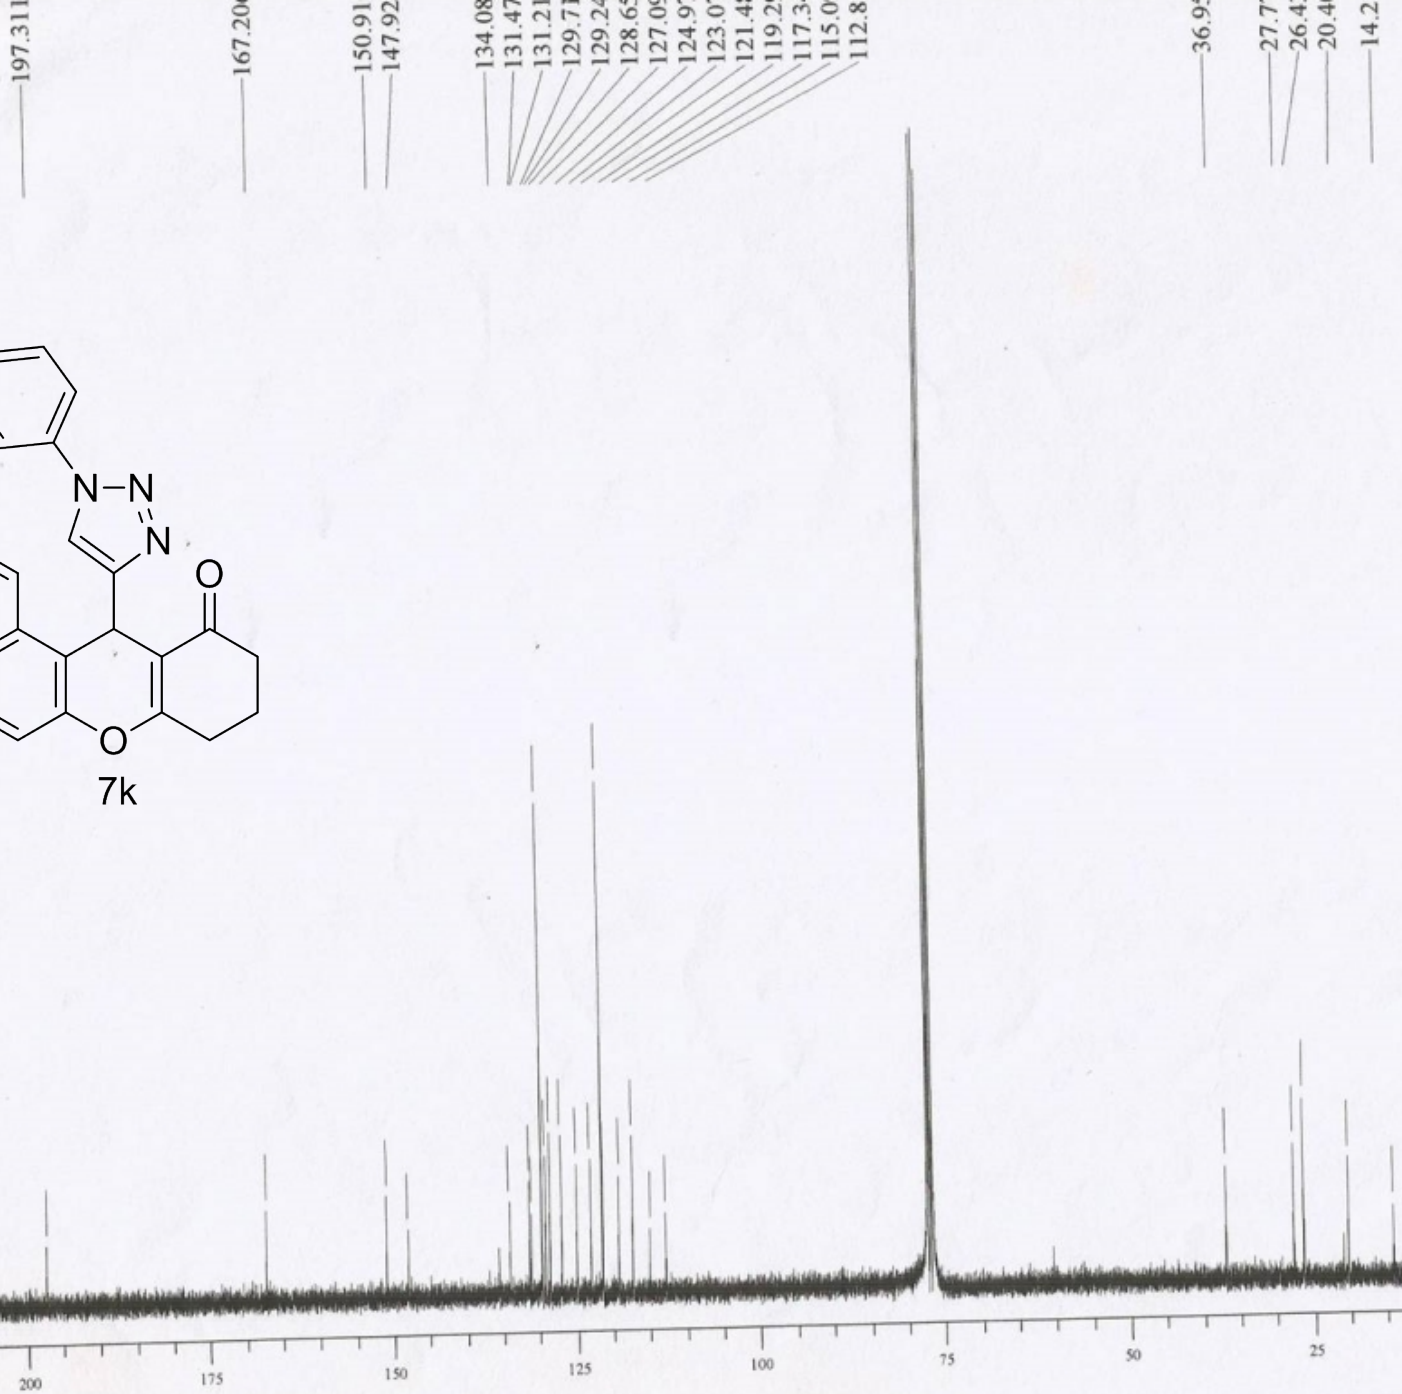

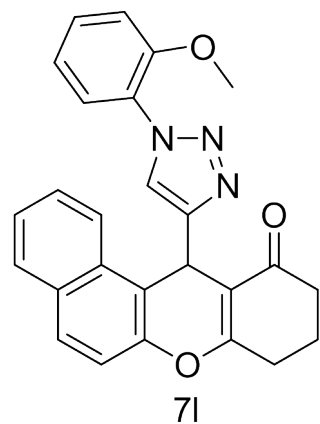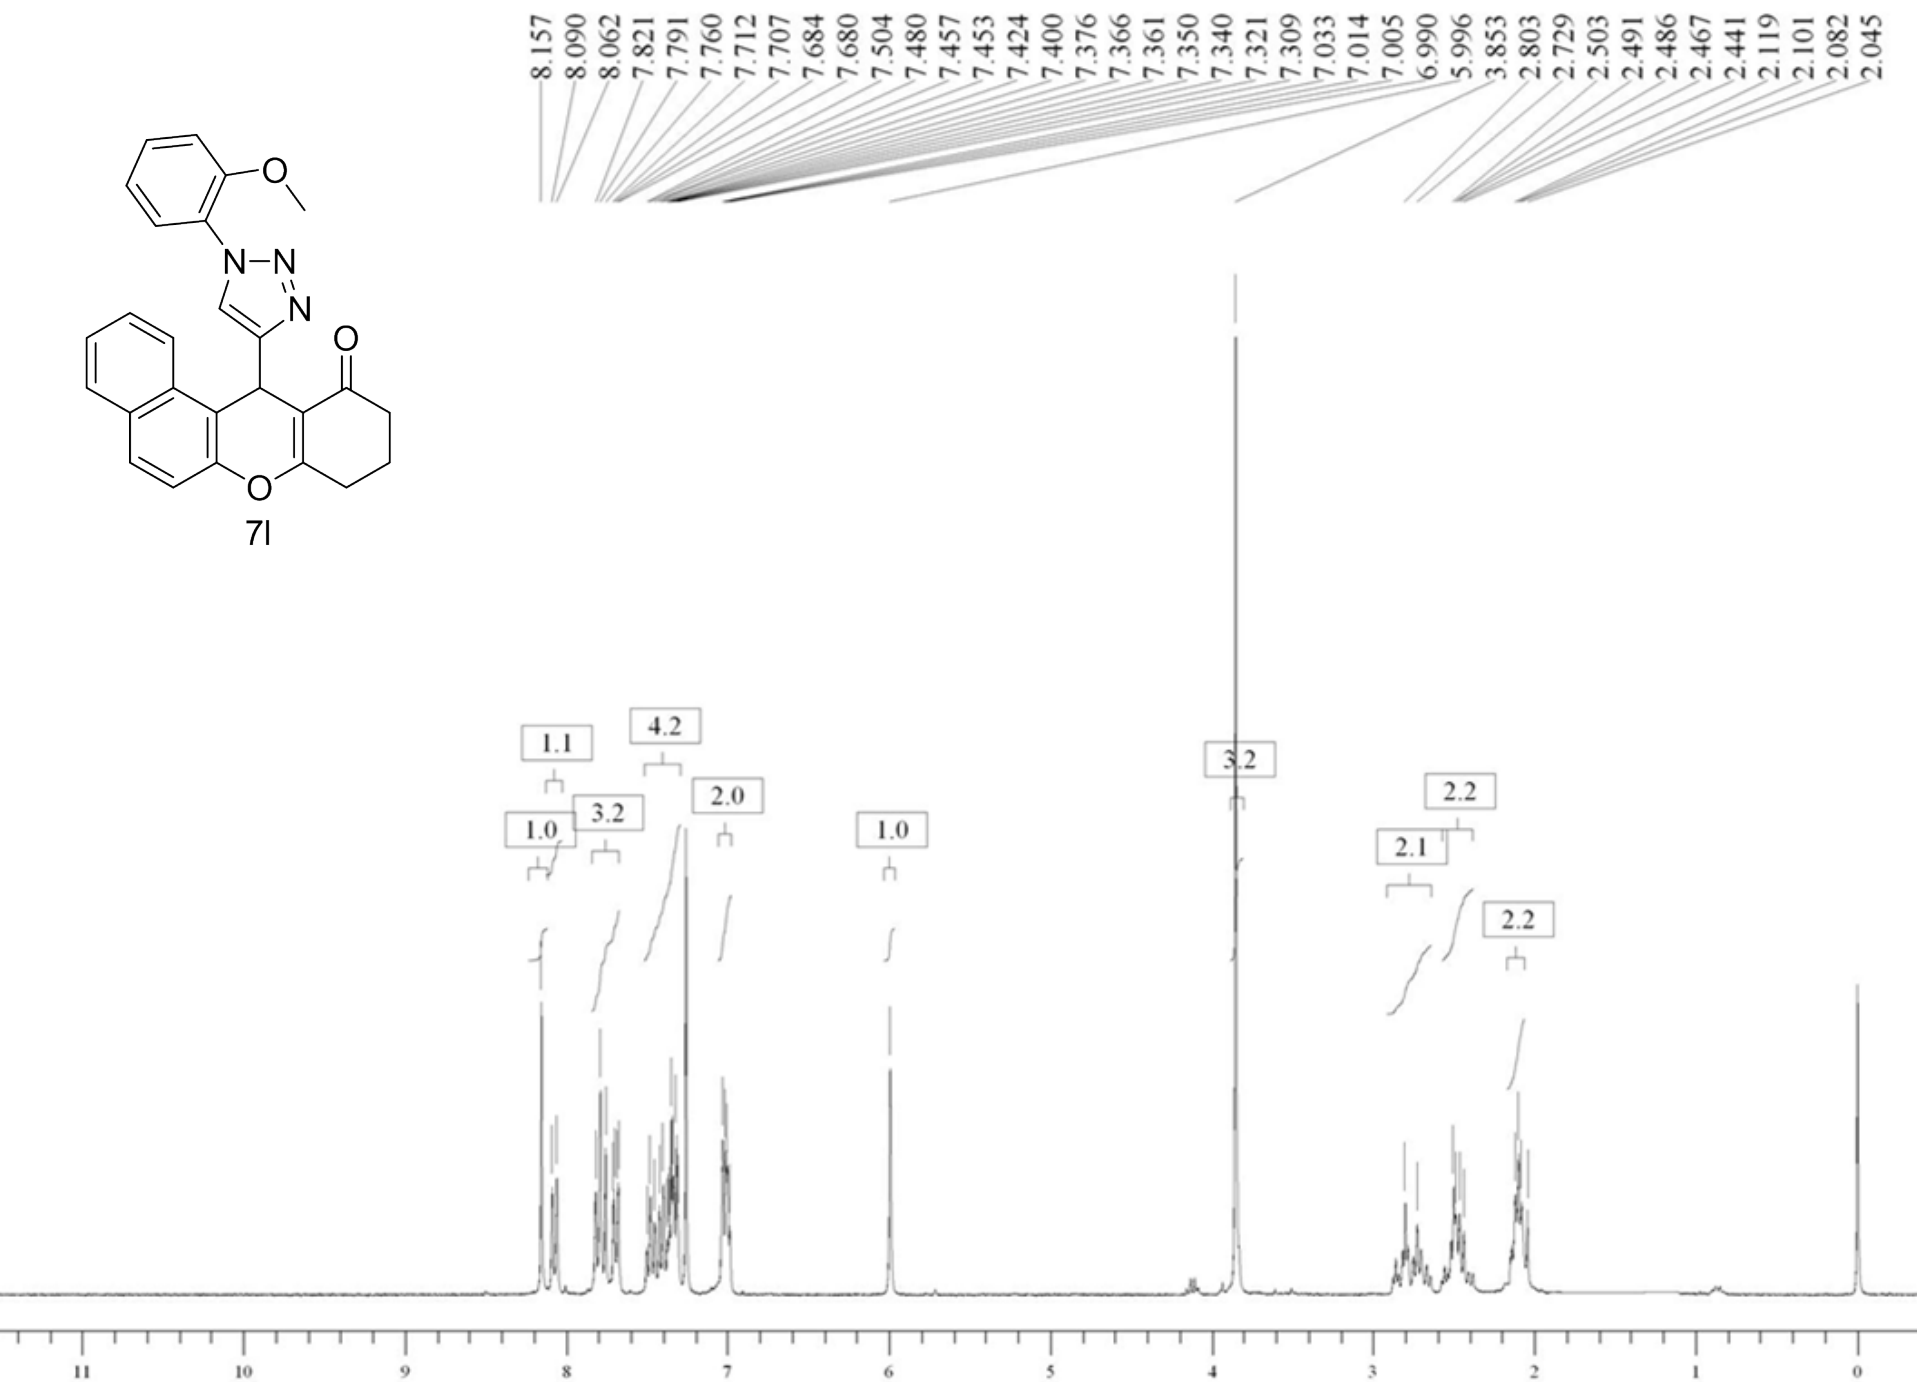

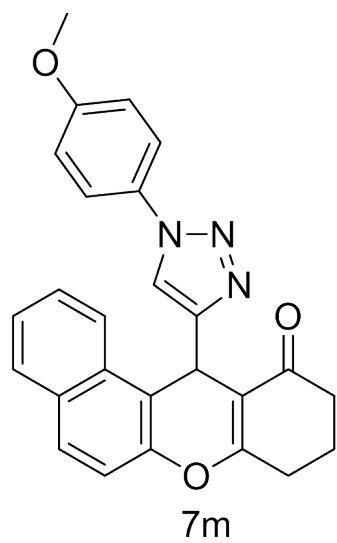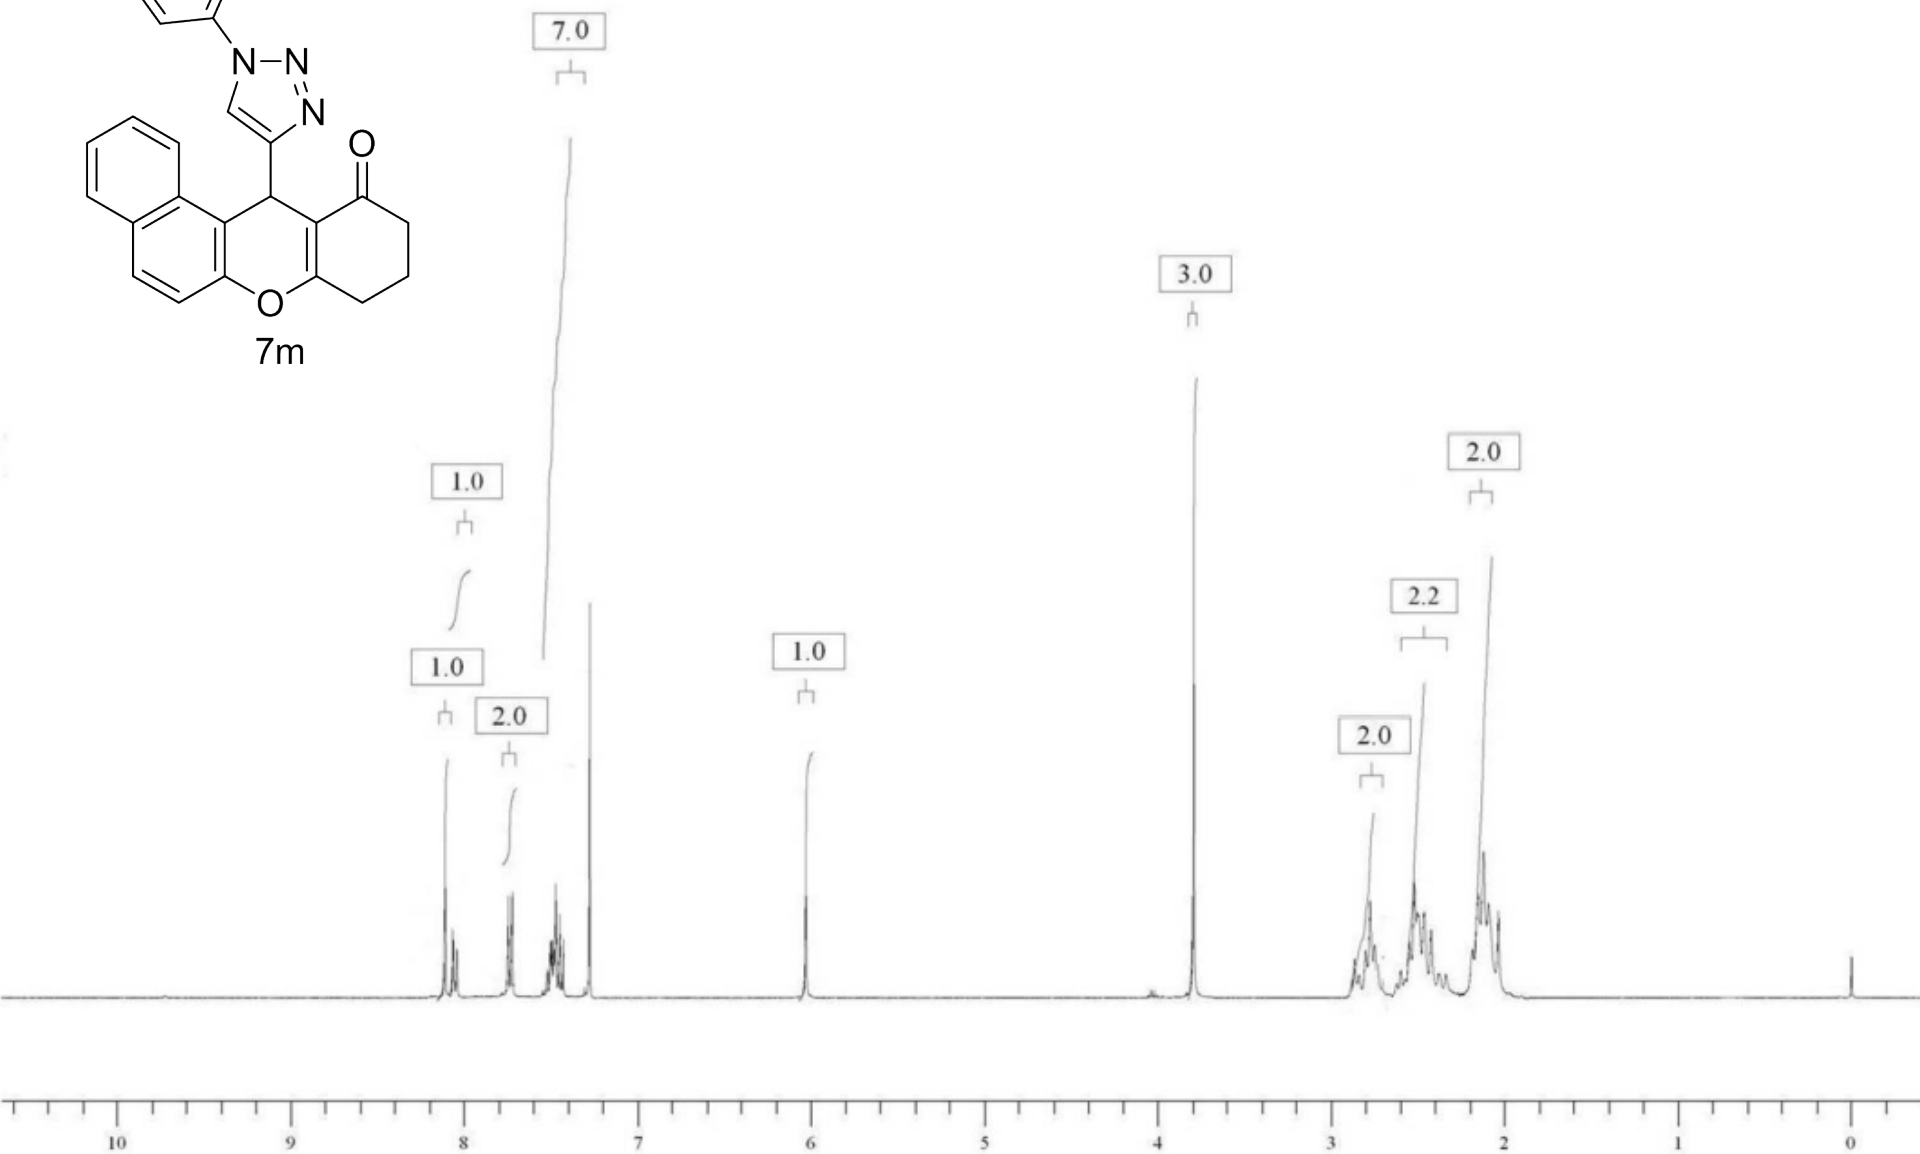

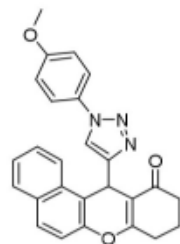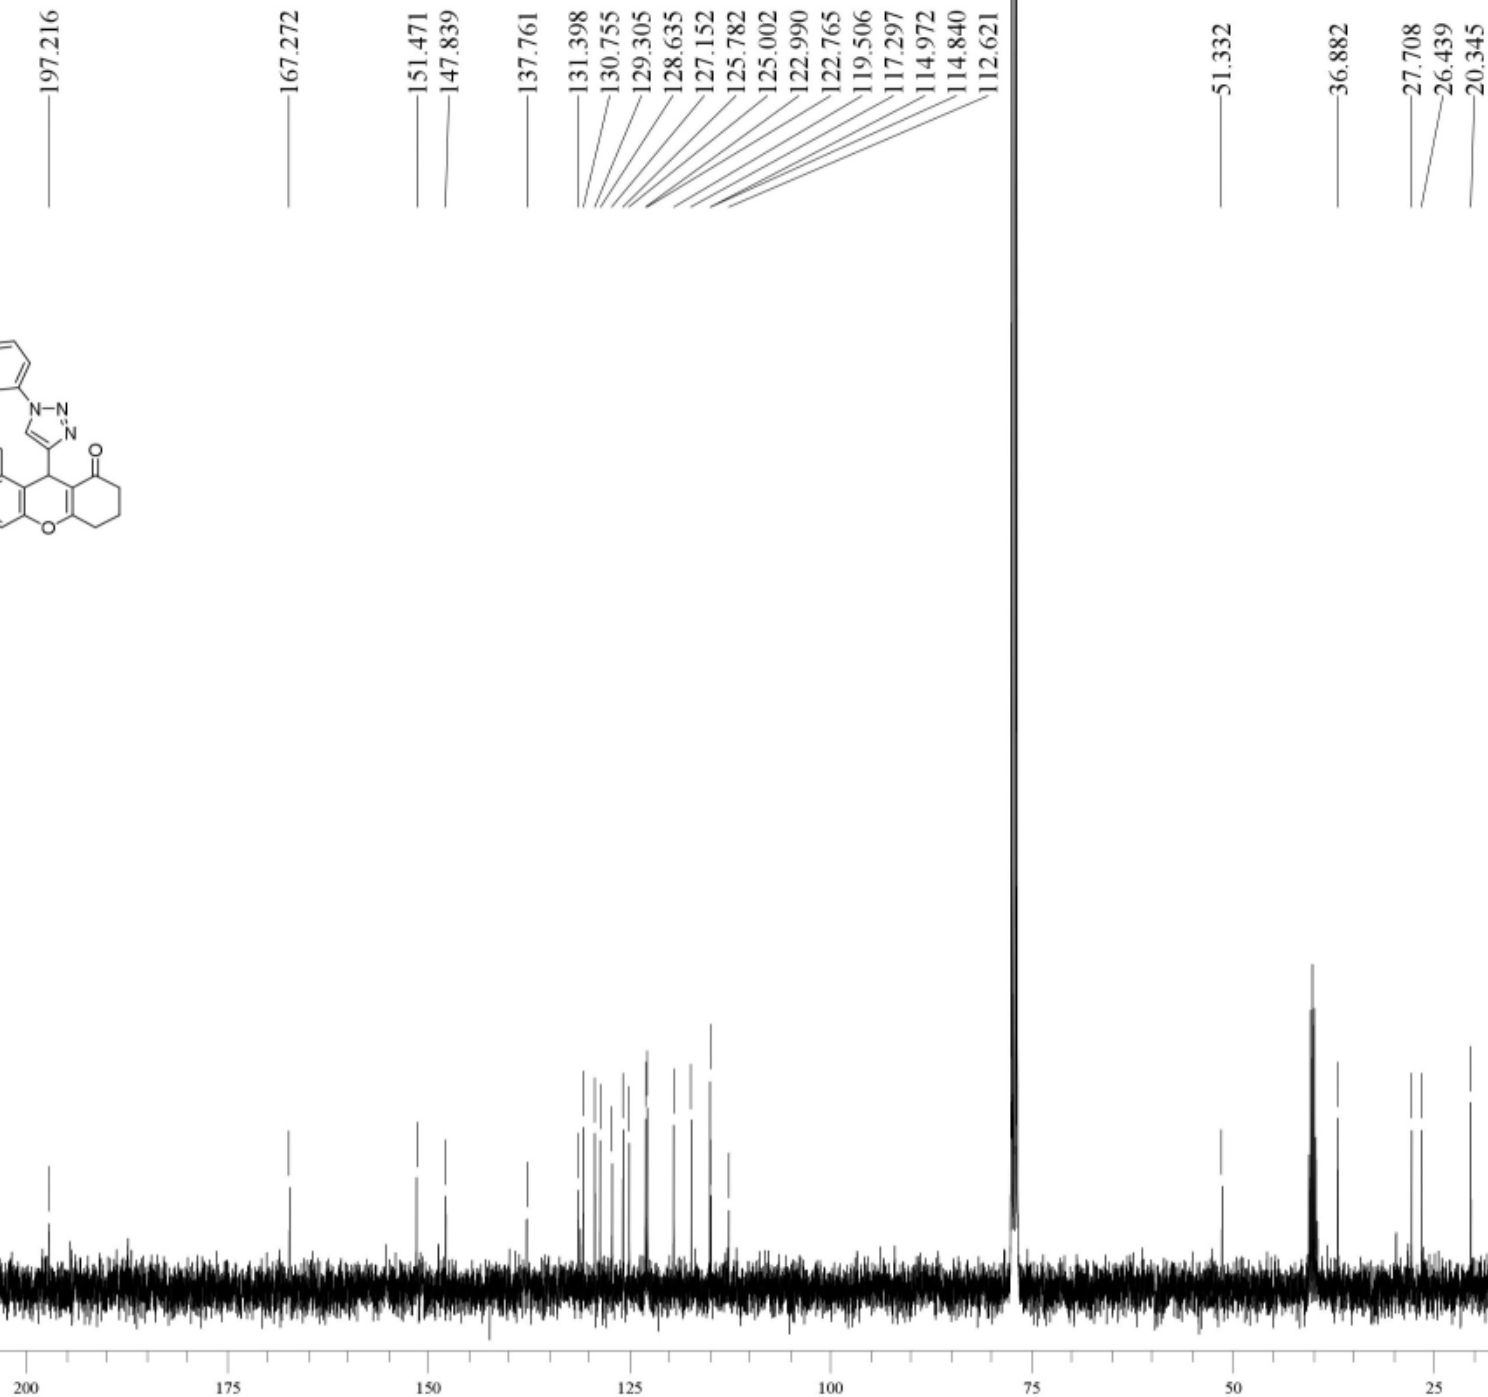

p-one + Dione

SHIMADZU

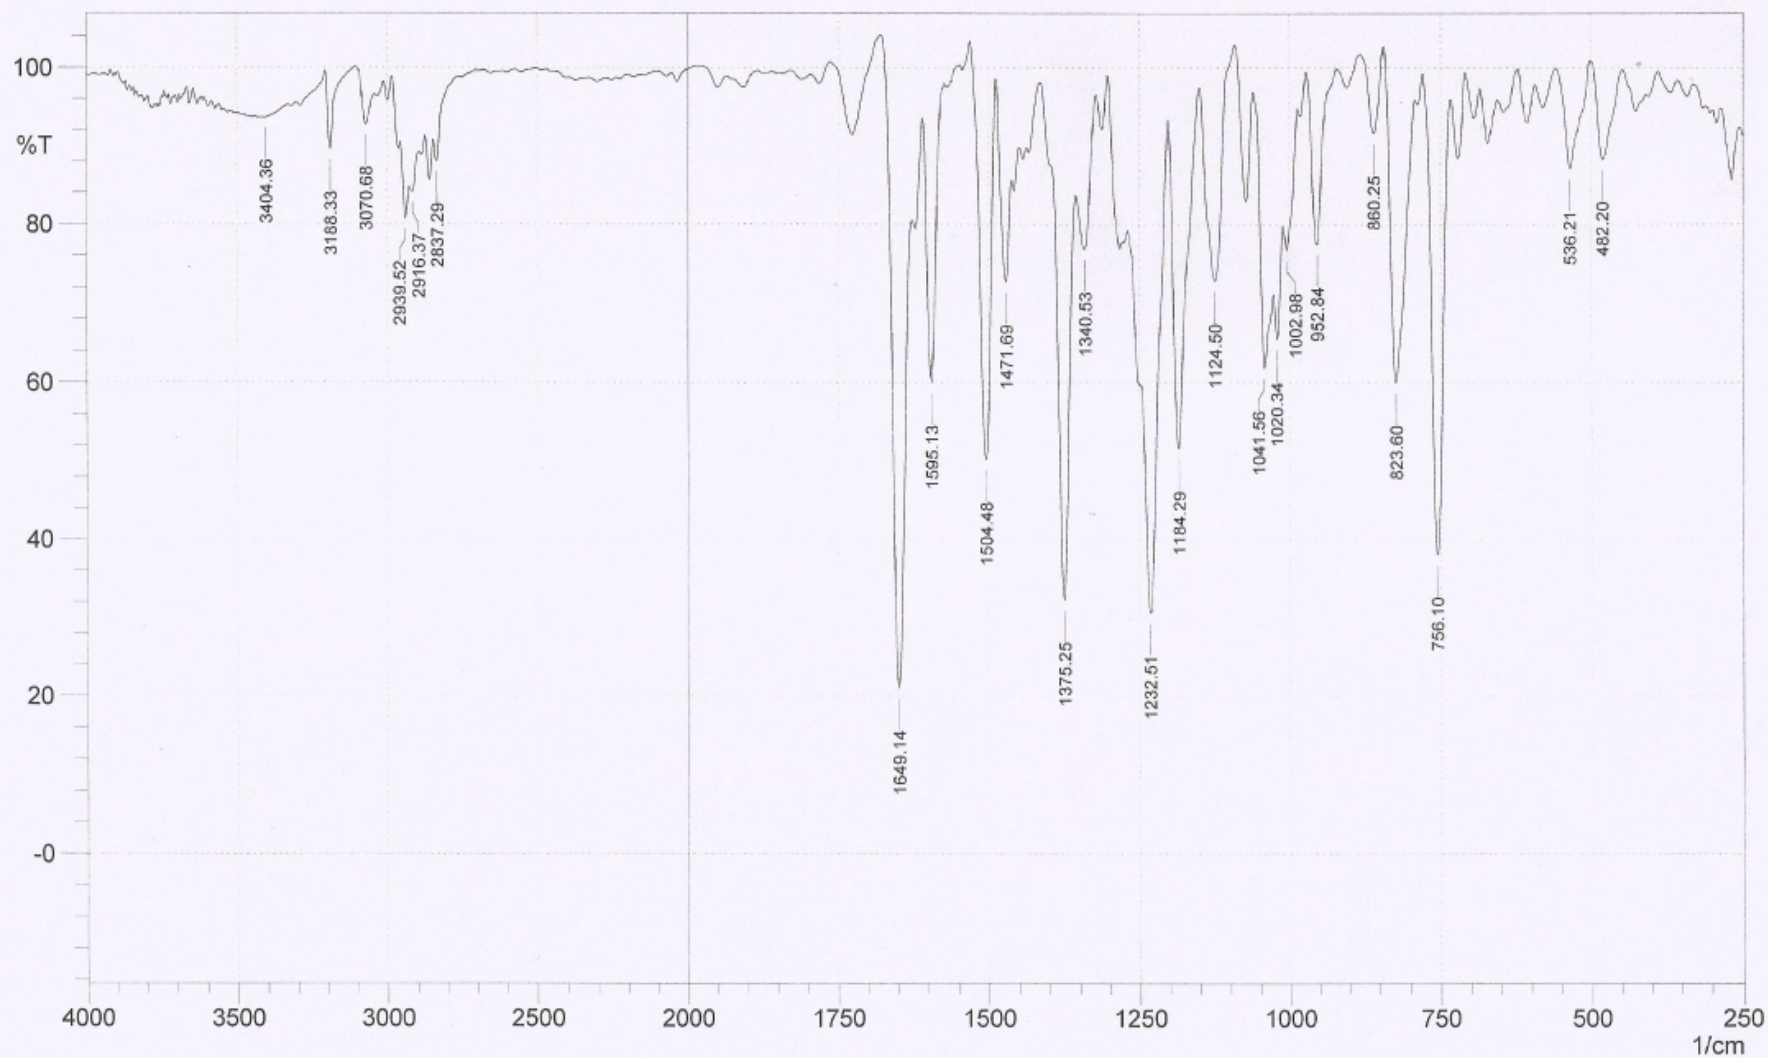

Comment;

No. of Scans;

Resolution;

Apodization;

Date/Time; 3/8/2016 2:58:21 PM

User; user



P1309-1042 3-CF3-Dione-B-Na

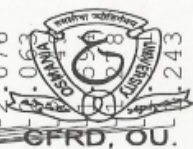

CFRD, OU.

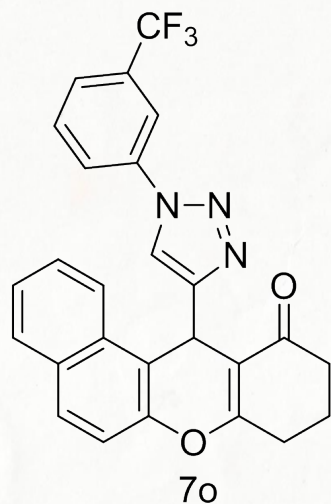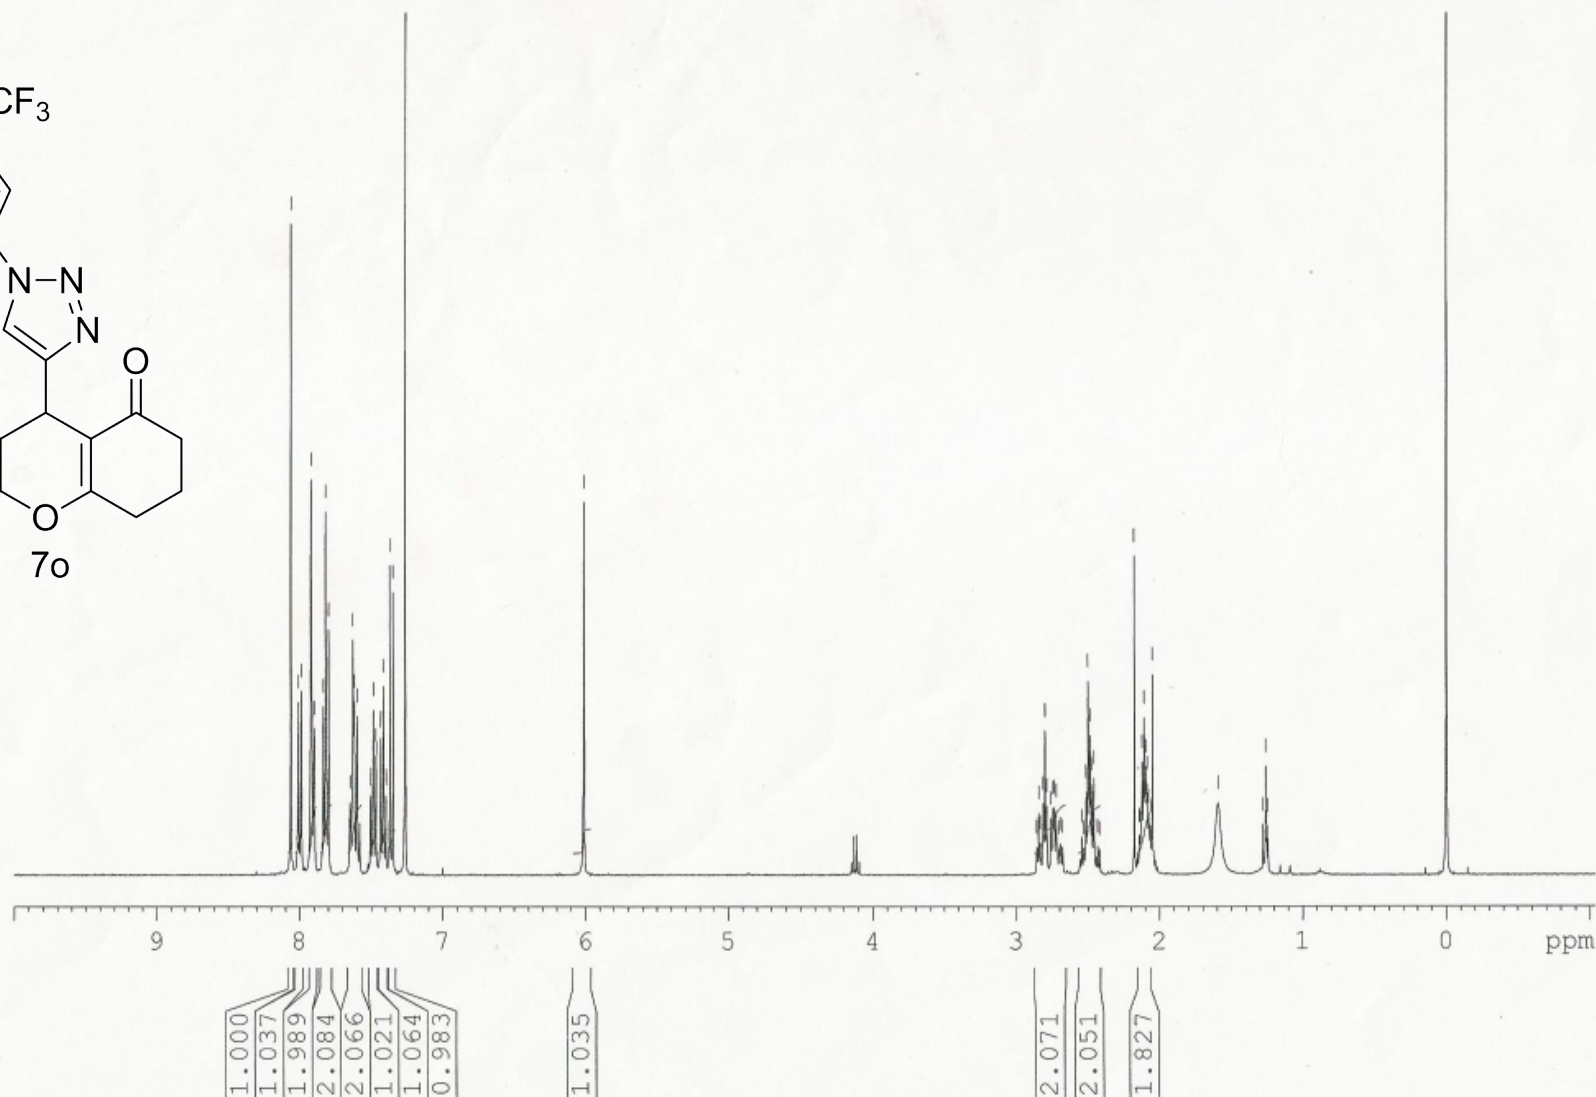

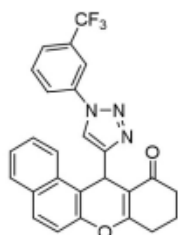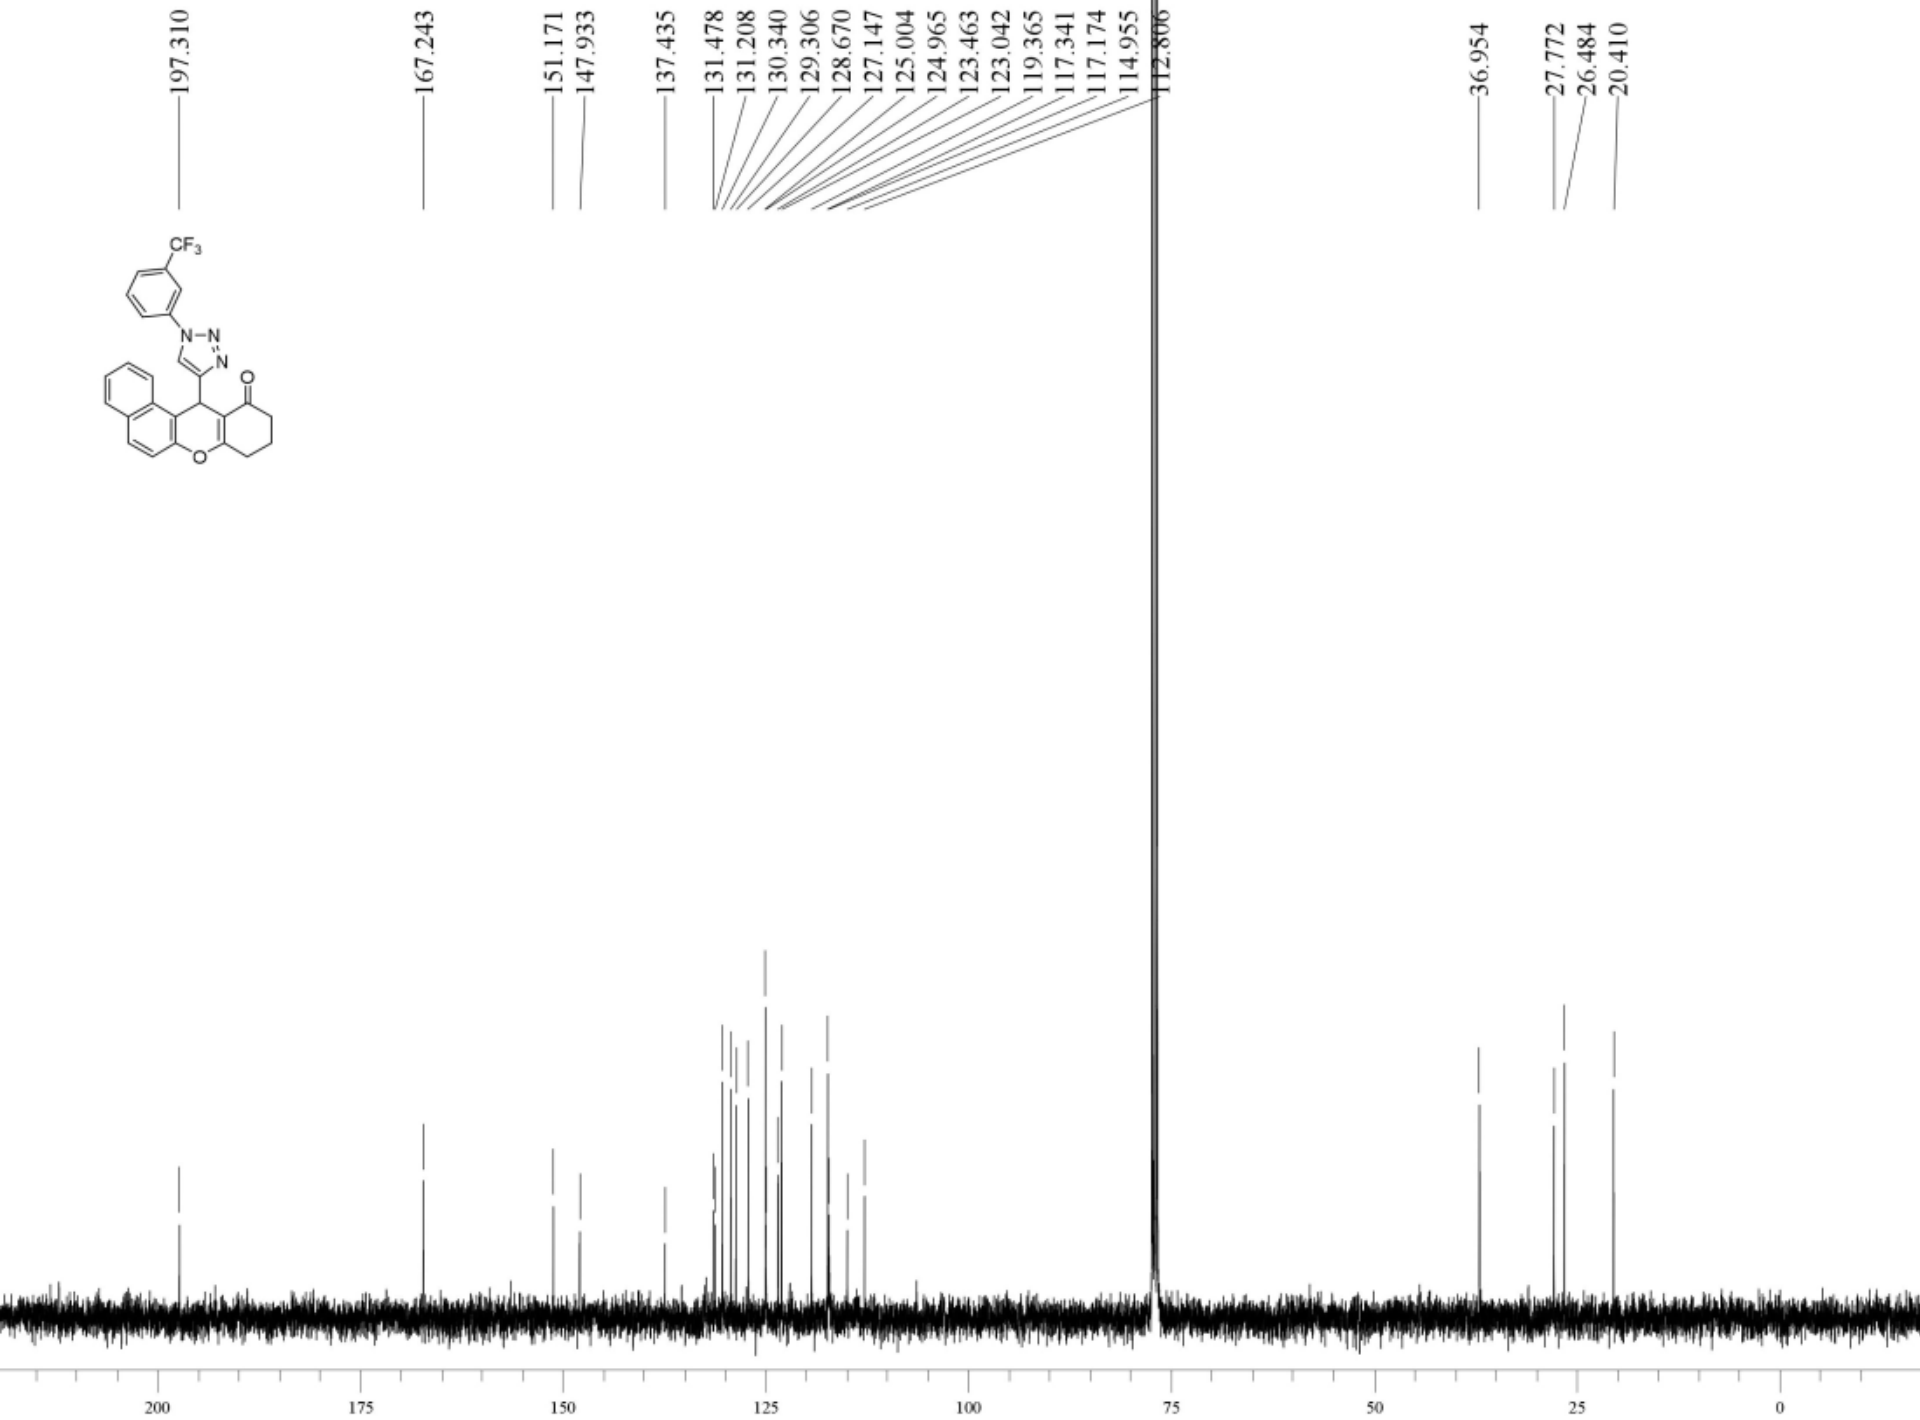



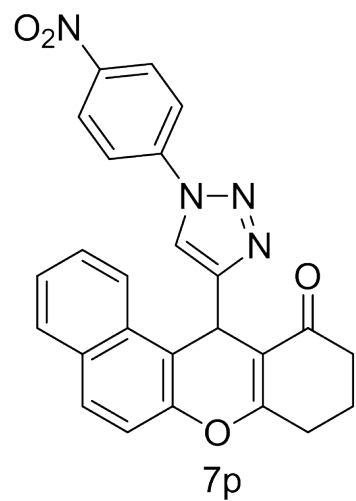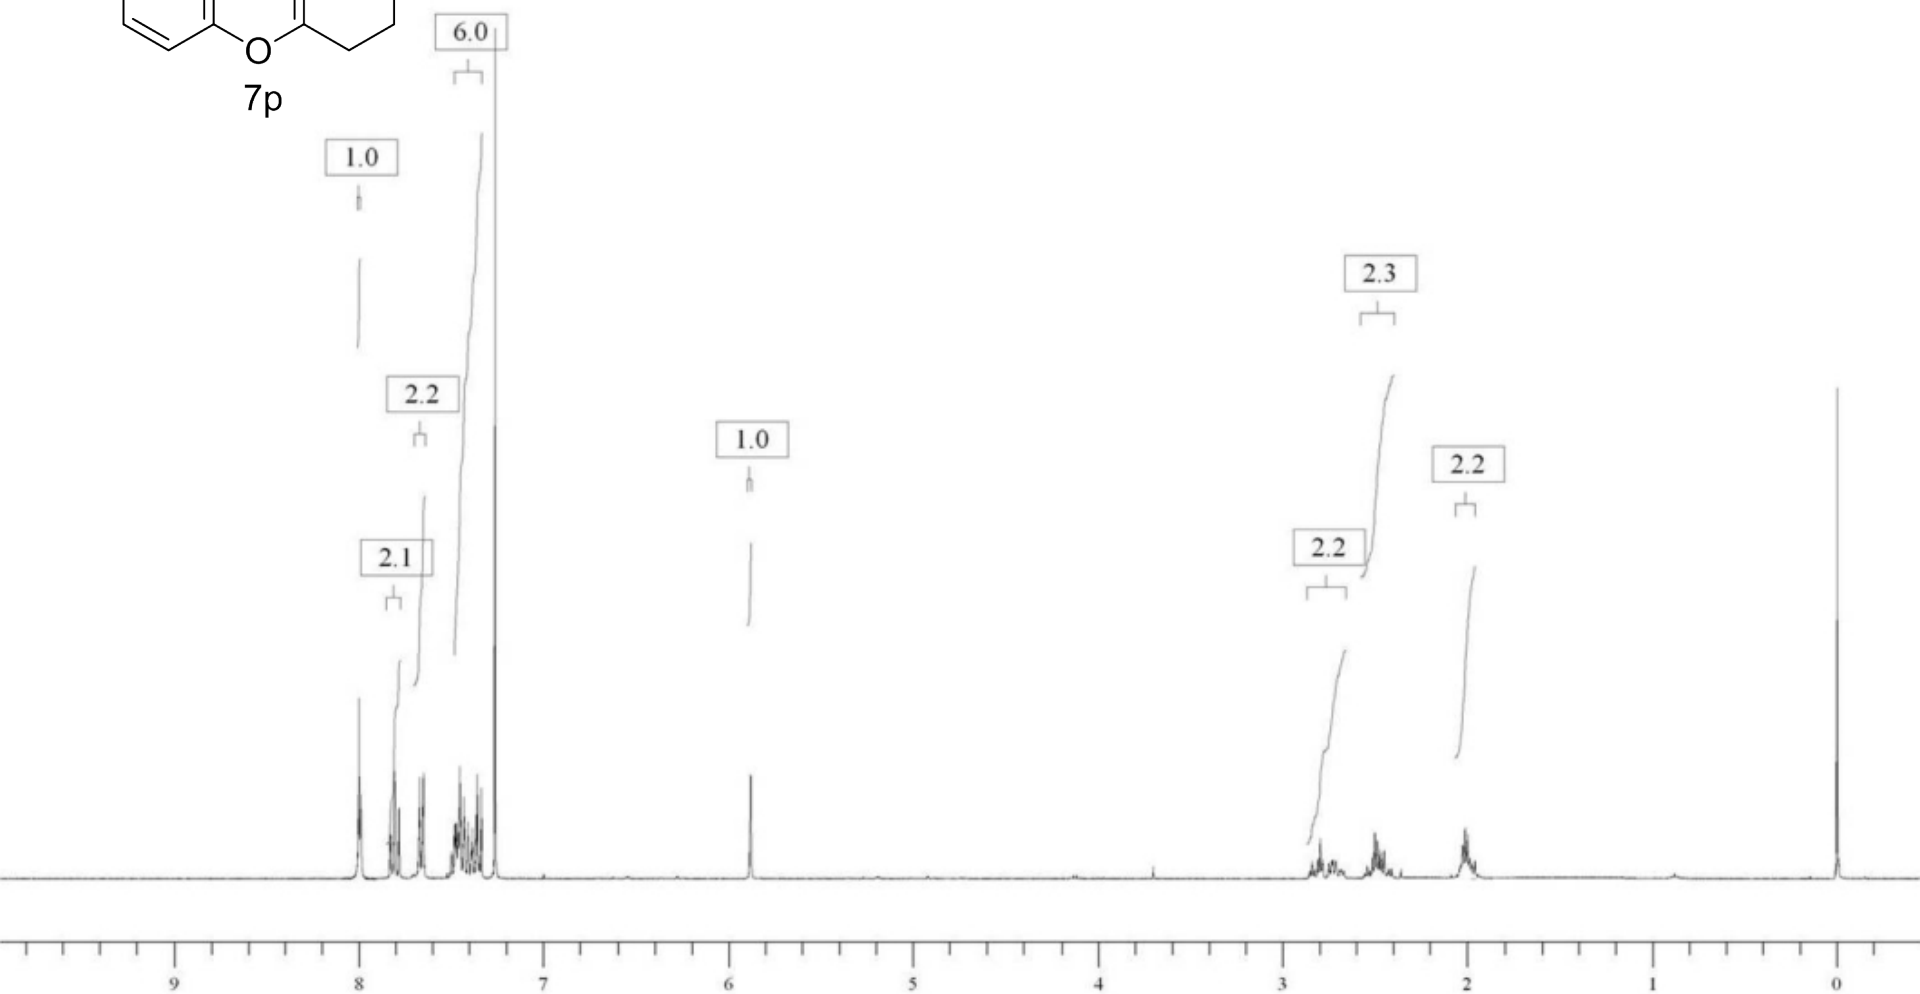

Supplement: c6md00593d1.pdf [file c6md00593d1.pdf]
