# Supplementary material for: Design, synthesis, molecular-docking and antimycobacterial evaluation of some novel 1,2,3-triazolyl xanthenones
Source: Royal Society of Chemistry journal article supplement (doi:10.1039/c6md00593d), 2017-01-01
Supplement: c6md00593d2.pdf [file c6md00593d2.pdf]

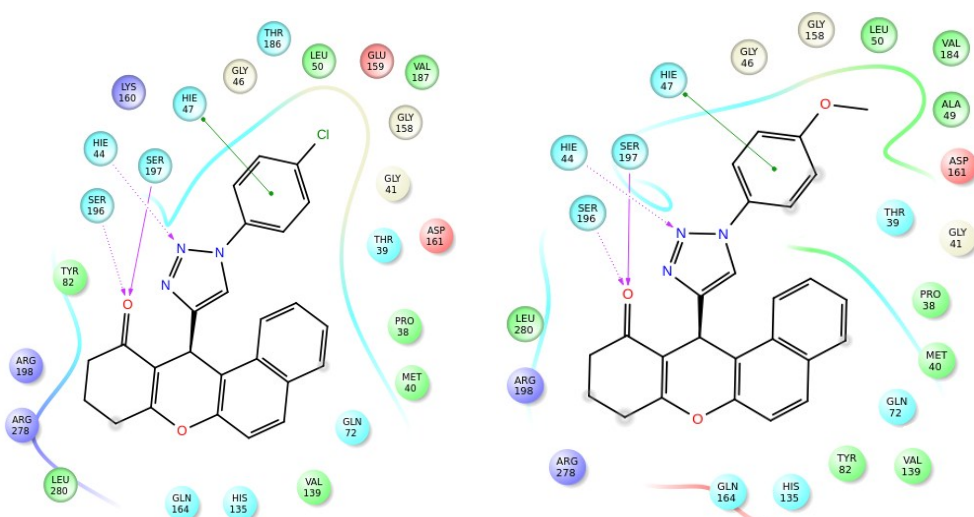

Figure 1: Ligand interaction diagram of *S*-configuration 7k and 7m

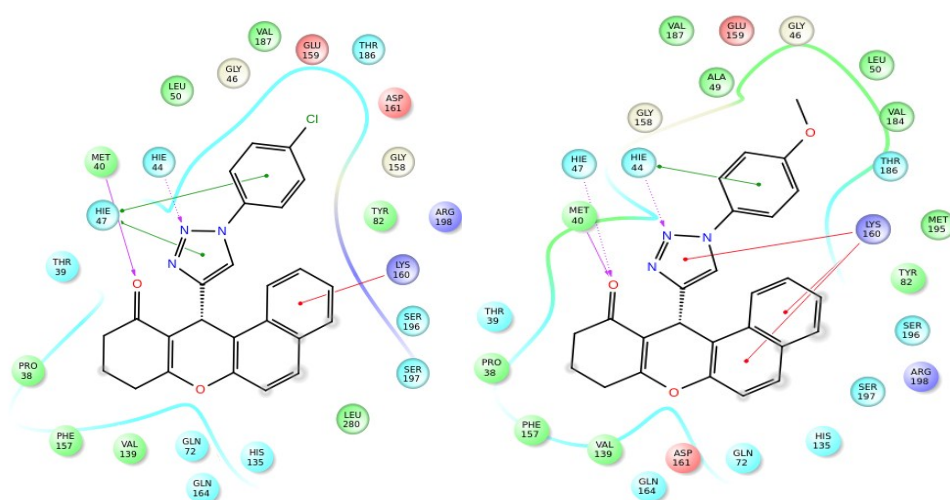

Figure 2: Ligand interaction diagram of *R*-configuration 7k and 7m

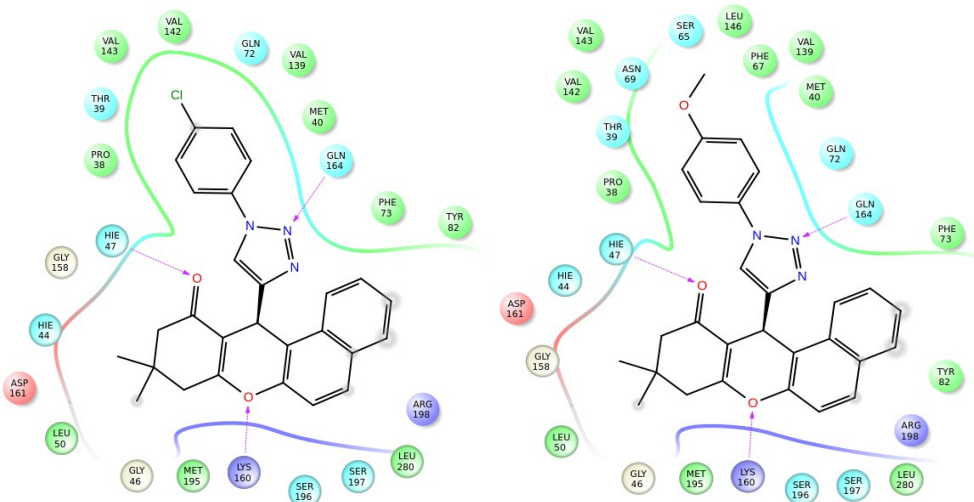

Figure 3: Ligand interaction diagram of *S*-configuration 7c and 7e

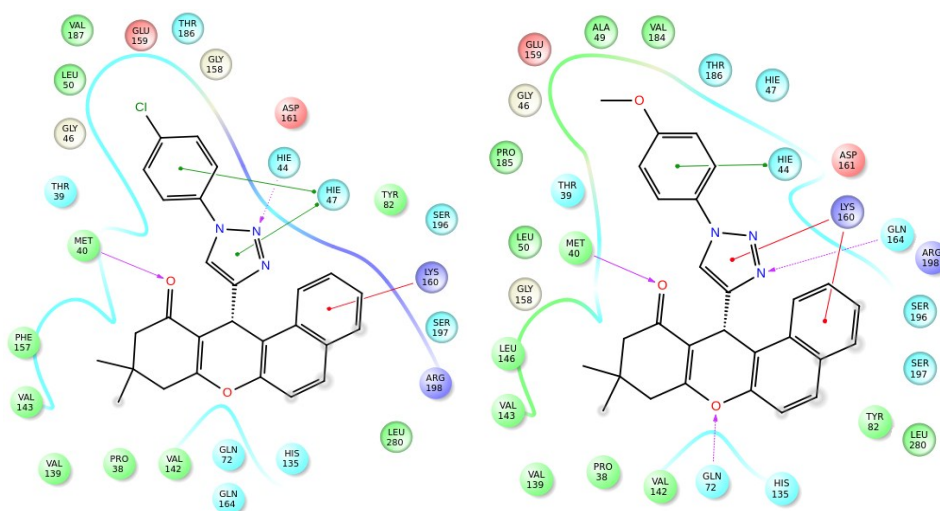

Figure 4: Ligand interaction diagram of *R*-configuration 7c and 7e

**Table 1:** Dock score, Emodel, bond length and bond angles of *R* and *S*-compounds of 7c, 7e, 7k and 7m.

| Compound     | Dock score | Emodel | Bond length                                                          | Bond angle |
|--------------|------------|--------|----------------------------------------------------------------------|------------|
| <i>R</i> -7c | -6.63      | -64.66 | 2.24 Å° (MET 40)<br>2.72 Å° (HIE 44)                                 | 105.0°     |
| <i>R</i> -7e | -6.77      | -60.12 | 2.41 Å° (MET 40)<br>2.40 Å° (GLN 72)<br>2.38 Å° (GLN 164)            | 106.8°     |
| <i>R</i> -7k | -6.03      | -59.56 | 2.37 Å° (MET 40)<br>2.71 Å° (HIE 44)                                 | 92.6°      |
| <i>R</i> -7m | -6.58      | -59.40 | 2.22 Å° (MET 40)<br>2.56 Å° (HIE 44)<br>2.77 Å° (HIE 47)             | 97.7°      |
| <i>S</i> -7c | -5.91      | -54-70 | 1.93 Å° (HIE 47)<br>2.26 Å° (GLN 164)<br>2.30 Å° (LYS 160)           | 69.9°      |
| <i>S</i> -7e | -5.52      | -51.66 | 1.95 Å° (HIE 47)<br>2.27 Å° (GLN 164)<br>2.24 Å° (LYS 160)           | 76.2°      |
| <i>S</i> -7k | -6.77      | -58.79 | 2.05 Å° (SER 196)<br>2.01 Å° & 2.64 Å° (SER 197)<br>2.03 Å° (HIE 44) | 67.2°      |
| <i>S</i> -7m | -6.98      | -58.25 | 2.14 Å° (SER 196)<br>1.82 Å° & 2.39 Å° (SER 197)<br>2.09 Å° (HIE 44) | 62.5°      |
